# Supplementary material for: Functional Complexity of the Axonal Growth Cone: A Proteomic Analysis
Source: PubMed Central journal article supplement (PMC3288056; doi:10.1371/journal.pone.0031858), 2012-02-27
Supplement: pone.0031858.s001.pdf [file pone.0031858.s001.pdf]

**Table S1: Gene Symbols and Protein Names**

| <b>Gene Symbol</b> | <b>Protein Name</b>                                                                         |
|--------------------|---------------------------------------------------------------------------------------------|
| Aars               | alanyl-tRNA synthetase                                                                      |
| Actb               | actin, beta                                                                                 |
| Actc1              | actin, alpha, cardiac muscle 1                                                              |
| Actg1              | actin, gamma 1                                                                              |
| Actn4              | actinin alpha 4                                                                             |
| Actr3              | ARP3 actin-related protein 3 homolog (yeast)                                                |
| Add1               | adducin 1 (alpha)                                                                           |
| Afp                | alpha-fetoprotein                                                                           |
| Alb                | albumin                                                                                     |
| Aldoa              | aldolase A, fructose-bisphosphate                                                           |
| Aldoc              | aldolase C, fructose-bisphosphate                                                           |
| Anapc1             | anaphase promoting complex subunit 1                                                        |
| Apex1              | APEX nuclease (multifunctional DNA repair enzyme) 1                                         |
| Apoa1              | apolipoprotein A-I                                                                          |
| Apob               | apolipoprotein B                                                                            |
| Arf1               | ADP-ribosylation factor 1                                                                   |
| Arf3               | ADP-ribosylation factor 3                                                                   |
| Arf5               | ADP-ribosylation factor 5                                                                   |
| Arpc2              | actin related protein 2/3 complex, subunit 2                                                |
| Arpc4              | actin related protein 2/3 complex, subunit 4                                                |
| Atp5a              | ATP synthase H <sup>+</sup> transporting, mitochondrial F1 complex, alpha subunit 1 (human) |
| Atp5b              | ATP synthase, H <sup>+</sup> transporting, mitochondrial F1 complex, beta polypeptide       |
| Basp1              | brain abundant, membrane attached signal protein 1                                          |
| Cadps              | Ca <sup>++</sup> -dependent secretion activator                                             |
| Canx               | calnexin                                                                                    |
| Cap1               | CAP, adenylate cyclase-associated protein 1 (yeast)                                         |
| Cct2               | chaperonin containing TCP1, subunit 2 (beta)                                                |
| Cct3               | chaperonin containing Tcp1, subunit 3 (gamma)                                               |
| Cct4               | chaperonin containing Tcp1, subunit 4 (delta)                                               |
| Cct5               | chaperonin containing Tcp1, subunit 5 (epsilon)                                             |
| Cct6a              | chaperonin containing Tcp1, subunit 6A (zeta 1)                                             |
| Cct7               | chaperonin containing Tcp1, subunit 7 (eta)                                                 |
| Cct8               | chaperonin containing Tcp1, subunit 8 (theta)                                               |
| Cdc42              | cell division cycle 42 (GTP binding protein)                                                |
| Cdk5               | cyclin-dependent kinase 5                                                                   |
| Cfl1               | cofilin 1, non-muscle                                                                       |
| Ckb                | creatine kinase, brain                                                                      |
| Clasp2             | cytoplasmic linker associated protein 2                                                     |
| Cltc               | clathrin, heavy chain (Hc)                                                                  |
| Copa               | coatamer protein complex subunit alpha                                                      |
| Copb1              | coatamer protein complex, subunit beta 1                                                    |
| Copb2              | coatamer protein complex, subunit beta 2 (beta prime)                                       |
| Copg               | coatamer protein complex, subunit gamma                                                     |
| Crmp1              | collapsin response mediator protein 1                                                       |
| Cul3               | cullin 3                                                                                    |

| <b>Gene Symbol</b> | <b>Protein Name</b>                                                                                                       |
|--------------------|---------------------------------------------------------------------------------------------------------------------------|
| Cyb5r3             | cytochrome b5 reductase 3                                                                                                 |
| Dbn1               | drebrin 1                                                                                                                 |
| Dctn2              | dynactin 2                                                                                                                |
| Dpysl2             | dihydropyrimidinase-like 2                                                                                                |
| Dpysl3             | dihydropyrimidinase-like 3                                                                                                |
| Dpysl5             | dihydropyrimidinase-like 5                                                                                                |
| Dync1h1            | dynein cytoplasmic 1 heavy chain 1                                                                                        |
| Ecm29              | proteasome-associated protein ECM29 homolog                                                                               |
| Eef1a1             | eukaryotic translation elongation factor 1 alpha 1                                                                        |
| Eef1b2             | eukaryotic translation elongation factor 1 beta 2                                                                         |
| Eef1g              | eukaryotic translation elongation factor 1 ga                                                                             |
| Eef2               | eukaryotic translation elongation factor 2                                                                                |
| Eif2b5             | eukaryotic translation initiation factor 2B, subunit 5 epsilon                                                            |
| Eif3a              | eukaryotic translation initiation factor 3, subunit A                                                                     |
| Eif3b              | eukaryotic translation initiation factor 3, subunit B                                                                     |
| Eif4a1             | eukaryotic translation initiation factor 4A1                                                                              |
| Eif4g1             | eukaryotic translation initiation factor 4 gamma, 1                                                                       |
| Enah               | enabled homolog (Drosophila)                                                                                              |
| Eno1               | enolase 1, (alpha)                                                                                                        |
| Eno2               | enolase 2, gamma, neuronal                                                                                                |
| Ephb2              | Eph receptor B2                                                                                                           |
| Exoc8              | exocyst complex component 8                                                                                               |
| Fasn               | fatty acid synthase                                                                                                       |
| Fdps               | farnesyl diphosphate synthase (farnesyl pyrophosphate synthetase, dimethylallyltranstransferase, geranyltranstransferase) |
| Gap43              | growth associated protein 43                                                                                              |
| Gapdh              | glyceraldehyde-3-phosphate dehydrogenase                                                                                  |
| Gars               | glycyl-tRNA synthetase                                                                                                    |
| Gdi1               | GDP dissociation inhibitor 1                                                                                              |
| Gdi2               | GDP dissociation inhibitor 2                                                                                              |
| Glrx3              | glutaredoxin 3                                                                                                            |
| Golph3             | Golgi phosphoprotein 3 (GMx33)                                                                                            |
| Gpi                | glucose phosphate isomerase                                                                                               |
| Hdac6              | histone deacetylase 6                                                                                                     |
| Hist1h2bl          | histone cluster 1, H2bl                                                                                                   |
| Hist3h2ba          | histone cluster 3, H2ba                                                                                                   |
| Hmgcs1             | 3-hydroxy-3-methylglutaryl-Coenzyme A synthase 1 (soluble)                                                                |
| Hsp90aa1           | heat shock protein 90, alpha (cytosolic), class A member 1                                                                |
| Hsp90ab1           | heat shock protein 90kDa alpha (cytosolic), class B member 1                                                              |
| Hspa4              | heat shock protein 4                                                                                                      |
| Hspa8              | heat shock protein A8                                                                                                     |
| Idi1               | isopentenyl-diphosphate delta isomerase 1                                                                                 |
| Ipo5               | Importin 5                                                                                                                |
| Kif1 (-21)         | kinesin family member 1 (-21)                                                                                             |
| Kif5c              | kinesin family member 5C                                                                                                  |
| Kpna2              | karyopherin $\alpha$ 2                                                                                                    |
| Kpnb1              | karyopherin (importin) beta 1                                                                                             |
| Ldhb               | lactate dehydrogenase B                                                                                                   |
| Man2a1             | mannosidase alpha, class 2A (member 1)                                                                                    |

| <b>Gene Symbol</b> | <b>Protein Name</b>                                                              |
|--------------------|----------------------------------------------------------------------------------|
| Map1b              | microtubule-associated protein 1B                                                |
| Map2b              | Microtubule-associated protein 2 (isoform B)                                     |
| Mapre1             | microtubule-associated protein, RP/EB family, member 1                           |
| Mapt               | microtubule-associated protein tau                                               |
| Mcm7               | minichromosome maintenance protein 7                                             |
| Mvd                | mevalonate (diphospho) decarboxylase                                             |
| Myh10              | myosin, heavy chain 10, non-muscle                                               |
| Ncam1              | neural cell adhesion molecule 1                                                  |
| Nckap1             | NCK-associated protein 1                                                         |
| Nrcam              | neuronal cell adhesion molecule                                                  |
| Nrp1               | neuropilin 1                                                                     |
| Pdia3              | protein disulfide isomerase family A, member 3                                   |
| Pdia6              | protein disulfide isomerase A6                                                   |
| Pena               | proliferating cell nuclear antigen                                               |
| Pkm2               | pyruvate kinase, muscle                                                          |
| Plxna1             | Plexin A1 (mouse)                                                                |
| Plxna2             | plexin A2                                                                        |
| Plxnb2             | plexin B2                                                                        |
| Ppia               | peptidylprolyl isomerase A (cyclophilin A)                                       |
| Ppp2r1a            | protein phosphatase 2 (formerly 2A), regulatory subunit A, alpha isoform         |
| Prdx1              | peroxiredoxin 1                                                                  |
| Prdx2              | peroxiredoxin 2                                                                  |
| Psma1 - Psma7      | proteasome (prosome, macropain) subunit, alpha type 1 (-7)                       |
| Psmb1 - Psmb7      | proteasome (prosome, macropain) subunit, beta type 1 (-7)                        |
| Psmc1 - Psmc6      | proteasome (prosome, macropain) 26S subunit, ATPase 1 (-6)                       |
| Psmd1              | proteasome (prosome, macropain) 26S subunit, non-ATPase, 1                       |
| Psmd1 - Psmd14     | proteasome (prosome, macropain) 26S subunit, non-ATPase, 1 (-14)                 |
| Psme1 - Psme4      | proteasome (prosome, macropain) activator subunit 1 (-4)                         |
| Psme3              | proteasome activator complex, subunit 3                                          |
| Qars               | glutaminyl-tRNA synthetase                                                       |
| Rab1 (-40)         | Ras-related protein 1 (-40)                                                      |
| Rac1               | ras-related C3 botulinum toxin substrate 1                                       |
| Rad23b             | RAD23 homolog B ( <i>S. cerevisiae</i> )                                         |
| Rala               | v-ral simian leukemia viral oncogene homolog A (ras related)                     |
| Rars               | arginyl-tRNA synthetase                                                          |
| Robo2              | roundabout, axon guidance receptor, homolog 2 ( <i>Drosophila</i> )              |
| Rpn1               | dolichyl-diphospho-oligosaccharide-protein glycosyltransferase (ribophorin)      |
| Rps3               | ribosomal protein S3                                                             |
| Rtf1               | Rtf1, Paf1/RNA polymerase II complex component, homolog ( <i>S. cerevisiae</i> ) |
| Sar1a              | SAR1 homolog A ( <i>S. cerevisiae</i> )                                          |
| Sec31a             | SEC31 homolog A ( <i>S. cerevisiae</i> )                                         |
| Slc1a2             | solute carrier family 1 (glial high affinity glutamate transporter), member 2    |
| Slc1a3             | solute carrier family 1 (glial high affinity glutamate transporter), member 3    |
| Snap25             | synaptosomal-associated protein 25                                               |
| Stx1b              | syntaxin 1B                                                                      |
| Stxbp1             | syntaxin binding protein 1                                                       |
| Tcp1               | t-complex 1                                                                      |
| Tf                 | transferrin                                                                      |
| Tgoln1             | trans-golgi network protein (TGN38)                                              |

| <b>Gene Symbol</b> | <b>Protein Name</b>                                                                         |
|--------------------|---------------------------------------------------------------------------------------------|
| Tkt                | transketolase                                                                               |
| Tmx1               | Thioredoxin-related transmembrane protein 1 (Txndc1)                                        |
| Tpi1               | Triose phosphate isomerase 1                                                                |
| Tpm3               | tropomyosin 3, gamma                                                                        |
| Tuba1a             | tubulin, alpha 1A                                                                           |
| Tubb2b             | tubulin, beta 2b                                                                            |
| Tubb3              | tubulin, beta 3                                                                             |
| Tubb5              | tubulin, beta 5                                                                             |
| Txnrd1             | thioredoxin reductase 1                                                                     |
| Uba1               | ubiquitin-like modifier activating enzyme 1                                                 |
| Ube2o              | ubiquitin-conjugating enzyme E2O                                                            |
| Ube3a              | ubiquitin protein ligase E3A                                                                |
| Ubqln2             | ubiquilin 2                                                                                 |
| Ubr4               | ubiquitin protein ligase E3 component n-recognin 4                                          |
| Uchl1              | ubiquitin carboxyl-terminal esterase L1 (ubiquitin thiolesterase)                           |
| Ugg1               | UDP-glucose glycoprotein glucosyltransferase 1                                              |
| Uso1               | USO1 homolog, vesicle docking protein (yeast)                                               |
| Vapa               | VAMP (vesicle-associated membrane protein)-associated protein A                             |
| Vcp                | valosin-containing protein                                                                  |
| Vps29              | vacuolar protein sorting 29 homolog (S. cerevisiae)                                         |
| Ywhae              | tyrosine 3-monooxygenase/tryptophan 5-monooxygenase activation protein, epsilon polypeptide |
| Ywhaz              | tyrosine 3-monooxygenase/tryptophan 5-monooxygenase activation protein, zeta polypeptide    |
