# Supplementary material for: Functional Complexity of the Axonal Growth Cone: A Proteomic Analysis
Source: PubMed Central journal article supplement (PMC3288056; doi:10.1371/journal.pone.0031858), 2012-02-27
Supplement: pone.0031858.s002.pdf [file pone.0031858.s002.pdf]

|     |                                                                                                                                                                                                                                                                                            |     |    |    |    |    |    |
|-----|--------------------------------------------------------------------------------------------------------------------------------------------------------------------------------------------------------------------------------------------------------------------------------------------|-----|----|----|----|----|----|
| 330 | COP9 (constitutive photomorphogenic) homolog, subunit 7b (Arabidopsis thaliana) (predicted), isoform CRA_a [Rattus norvegicus], gi 149016358 gb EDL75604.1  COP9 (constitutive photomorphogenic) homolog, subunit 7b (Arabidopsis thaliana) (predicted), isoform CRA_a [Rattus norvegicus] | 30  | 92 | 11 | 14 | 17 | 75 |
| 331 | PREDICTED: similar to hect (homologous to the E6-AP (UBE3A) carboxyl terminus and RCC1 (CHC1)-like domain (RLD) 2 [Rattus norvegicus]                                                                                                                                                      | 492 | 59 | 1  | 32 | 32 | 27 |
| 332 | esterase D/formylglutathione hydrolase [Rattus norvegicus], gi 193806001 sp B0BNE5.1 ESTD_RAT RecName: Full=S-formylglutathione hydrolase; Short=FGH; AltName: Full=Esterase D, gi 149049957 gb EDM02281.1  esterase D/formylglutathione hydrolase (mapped), is                            | 31  | 55 | 33 | 15 | 25 | 30 |
| 333 | thimet oligopeptidase 1 [Rattus norvegicus], gi 189038855 sp P24155.4 THOP1_RAT RecName: Full=Thimet oligopeptidase; AltName: Full=Endo-oligopeptidase A; AltName: Full=Endopeptidase 24.15; AltName: Full=P2-peptidase; AltName: Full=Soluble metallo-thimet                              | 78  | 43 | 62 | 5  | 25 | 18 |
| 334 | Rho GDP dissociation inhibitor (GDI) alpha [Mus musculus], gi 55742827 ref NP_001007006.1  Rho GDP dissociation inhibitor (GDI) alpha [Rattus norvegicus], gi 21759130 sp Q99PT1.3 GDIR1_MOUSE RecName: Full=Rho GDP-dissociation inhibitor 1; Short=Rho GDI 1;                            | 23  | 71 | 39 | 4  | 16 | 55 |
| 335 | catenin (cadherin associated protein), alpha 2 (predicted), isoform CRA_b [Rattus norvegicus]                                                                                                                                                                                              | 102 | 90 | 1  | 11 | 11 | 79 |
| 336 | splicing factor 3b, subunit 3 [Rattus norvegicus], gi 149038189 gb EDL92549.1  splicing factor 3b, subunit 3 (predicted) [Rattus norvegicus]                                                                                                                                               | 72  | 79 | 21 | 8  | 15 | 64 |
| 337 | culin 3 [Rattus norvegicus], gi 149016247 gb EDL75493.1  culin 3 (predicted), isoform CRA_a [Rattus norvegicus]                                                                                                                                                                            | 86  | 87 | 8  | 17 | 20 | 67 |
| 338 | protein-L-isospartate (D-aspartate) O-methyltransferase 1, isoform CRA_b [Rattus norvegicus]                                                                                                                                                                                               | 30  | 66 | 32 | 15 | 25 | 41 |
| 339 | coatamer protein complex, subunit gamma [Rattus norvegicus], gi 123797612 sp Q4AEF8.1 COPG_RAT RecName: Full=Coatamer subunit gamma; AltName: Full=Gamma-coat protein; Short=Gamma-COP, gi 17891597 dbj BAE16997.1  coatamer protein complex, subunit gamma [Ra                            | 98  | 75 | 6  | 25 | 27 | 48 |
| 340 | lysyl-tRNA synthetase [Rattus norvegicus], gi 53733461 gb AAH83652.1  Lysyl-tRNA synthetase [Rattus norvegicus], gi 149038242 gb EDL92602.1  lysyl-tRNA synthetase, isoform CRA_b [Rattus norvegicus]                                                                                      | 72  | 76 | 0  | 21 | 21 | 55 |
| 341 | prolyl endopeptidase-like [Rattus norvegicus], gi 57921016 gb AAH89111.1  Prolyl endopeptidase-like [Rattus norvegicus], gi 149050505 gb EDM02678.1  similar to RIKEN cDNA D030028016 [Rattus norvegicus]                                                                                  | 73  | 67 | 5  | 25 | 27 | 40 |
| 342 | squamous cell carcinoma antigen recognized by T-cells 3 [Rattus norvegicus], gi 149063643 gb EDM13966.1  squamous cell carcinoma antigen recognized by T-cells 3 (predicted) [Rattus norvegicus]                                                                                           | 109 | 59 | 16 | 24 | 29 | 30 |
| 343 | PREDICTED: similar to ubiquitin protein ligase E3A isoform 2 [Rattus norvegicus], gi 109462056 ref XP_001055915.1  PREDICTED: similar to ubiquitin protein ligase E3A isoform 2 [Rattus norvegicus]                                                                                        | 98  | 76 | 14 | 17 | 21 | 55 |
| 344 | phosphoribosyl pyrophosphate synthetase-associated protein 2 [Rattus norvegicus], gi 73955994 ref XP_546654.2  PREDICTED: similar to phosphoribosyl pyrophosphate synthetase-associated protein 2 isoform 1 [Canis familiaris], gi 24418482 sp O08618.1 KPRB_RA                            | 41  | 86 | 8  | 13 | 16 | 70 |
| 345 | cell division cycle 42 isoform 1 [Homo sapiens], gi 6753364 ref NP_033991.1  cell division cycle 42 [Mus musculus], gi 55742784 ref NP_001003254.1  cell division cycle 42 [Canis lupus familiaris], gi 616889112 ref NP_741991.3  cell division cycle 42 [Rattu                           | 21  | 81 | 24 | 0  | 8  | 73 |
| 346 | ADP-ribosylation factor-like 8A [Mus musculus], gi 157818451 ref NP_001102541.1  ADP-ribosylation factor-like 8A [Rattus norvegicus], gi 81902053 sp Q8VEH3.1 ARL8A_MOUSE RecName: Full=ADP-ribosylation factor-like protein 8A; AltName: Full=ADP-ribosylation                            | 21  | 94 | 15 | 0  | 5  | 89 |
| 347 | actin-related protein 10 homolog ARP10 actin-related protein 10 homolog [Rattus norvegicus], gi 56541122 gb AAH87143.1  Actin-related protein 10 homolog (S. cerevisiae) [Rattus norvegicus], gi 149051386 gb EDM03559.1  ARP10 actin-related protein 10 homolo                            | 46  | 79 | 0  | 29 | 29 | 50 |
| 348 | testicular dynamin [Rattus norvegicus]                                                                                                                                                                                                                                                     | 96  | 79 | 2  | 14 | 15 | 64 |
| 349 | phosphoglycerate dehydrogenase [Rattus norvegicus], gi 3122856 sp O08651.3 SERA_RAT RecName: Full=D-3-phosphoglycerate dehydrogenase; Short=3-PGDH, gi 1944614 emb CAA66374.1  D-3-phosphoglycerate dehydrogenase [Rattus norvegicus], gi 7688285 emb CAB89828.                            | 56  | 73 | 28 | 11 | 20 | 53 |
| 350 | rCG38346, isoform CRA_d [Rattus norvegicus]                                                                                                                                                                                                                                                | 110 | 61 | 30 | 12 | 21 | 40 |
| 351 | 6-phosphogluconolactonase (predicted), isoform CRA_a [Rattus norvegicus]                                                                                                                                                                                                                   | 39  | 78 | 29 | 5  | 14 | 64 |
| 352 | RecName: Full=Hypoxia up-regulated protein 1; AltName: Full=150 kDa oxygen-regulated protein; AltName: Full=Orp150; Flags: Precursor, gi 1480453 gb AAB05672.1  150 kDa oxygen regulated protein                                                                                           | 111 | 68 | 23 | 6  | 13 | 55 |
| 353 | contactin 2 [Rattus norvegicus]                                                                                                                                                                                                                                                            | 113 | 73 | 22 | 3  | 10 | 63 |
| 354 | tubulin tyrosine ligase-like family, member 12 (predicted) [Rattus norvegicus]                                                                                                                                                                                                             | 79  | 54 | 20 | 18 | 24 | 30 |
| 355 | Rtn3 protein [Rattus norvegicus]                                                                                                                                                                                                                                                           | 28  | 84 | 2  | 5  | 6  | 78 |
| 356 | eukaryotic translation initiation factor 3, subunit 6 interacting protein [Rattus norvegicus]                                                                                                                                                                                              | 67  | 78 | 0  | 25 | 25 | 53 |
| 357 | RecName: Full=Aspartate aminotransferase, cytoplasmic; AltName: Full=Transaminase A; AltName: Full=Glutamate oxaloacetate transaminase 1, gi 345752 pir S29028 aspartate transaminase (EC 2.6.1.1) (clone 8C7) - human, gi 38197390 gb AAH61877.1  Glutamic-ox                             | 46  | 59 | 51 | 0  | 16 | 43 |
| 358 | RAB1B, member RAS oncogene family [Rattus norvegicus], gi 109463007 ref XP_001052971.1  PREDICTED: similar to Ras-related protein Rab-1B [Rattus norvegicus], gi 149042337 gb EDL96044.1  rCG63295 [Rattus norvegicus], gi 149062037 gb EDM12460.1  rCG48149, 1                            | 22  | 76 | 11 | 11 | 14 | 62 |
| 359 | RAD23 homolog B [Rattus norvegicus], gi 123789085 sp Q4KMA2.1 RD23B_RAT RecName: Full=UV excision repair protein RAD23 homolog B, gi 68534740 gb AAH98674.1  RAD23 homolog B (S. cerevisiae) [Rattus norvegicus], gi 149037170 gb EDL91701.1  RAD23b homolog (S                            | 43  | 75 | 24 | 2  | 10 | 65 |
| 360 | culin 5 [Rattus norvegicus], gi 13124593 sp Q9J31.3 CUL5_RAT RecName: Full=Culin-5; Short=CUL-5; AltName: Full=Vasopressin-activated calcium-mobilizing receptor; AltName: Full=VACM-1, gi 7381163 gb AAF61416.1 AF135115_1 vasopressin-activated calcium-mo                               | 91  | 71 | 11 | 14 | 17 | 54 |
| 361 | basic transcription factor 3 isoform B [Homo sapiens], gi 56605700 ref NP_001008310.1  basic transcription factor 3 [Rattus norvegicus], gi 109077568 ref XP_001100502.1  PREDICTED: basic transcription factor 3 isoform 3 [Macaca mulatta], gi 114599709 ref                             | 18  | 78 | 34 | 0  | 11 | 67 |
| 362 | nucleoside diphosphate kinase B [Rattus norvegicus], gi 127984 sp P19804.1 NDKB_RAT RecName: Full=Nucleoside diphosphate kinase B; Short=NDP kinase B; Short=NDK B; AltName: Full=P18, gi 205662 gb AAA41684.1  nucleoside diphosphate kinase, gi 55778652 gb A                            | 17  | 66 | 37 | 0  | 12 | 54 |
| 363 | casein kinase 2, alpha 1 polypeptide [Rattus norvegicus], gi 729878 sp P19139.2 CSK2.1_RAT RecName: Full=Casein kinase II subunit alpha; Short=CK II, gi 415716 gb AAA74462.1  casein kinase II alpha subunit, gi 60551761 gb AAH91130.1  Csnk2a1 protein [Rattu                           | 45  | 65 | 13 | 19 | 23 | 42 |
| 364 | importin 4 [Rattus norvegicus], gi 149063984 gb EDM14254.1  importin 4 (predicted), isoform CRA_b [Rattus norvegicus]                                                                                                                                                                      | 119 | 87 | 11 | 6  | 9  | 78 |
| 365 | phosphoribosylglycinamide formyltransferase [Rattus norvegicus], gi 62657641 ref XP_573258.1  PREDICTED: similar to Trifunctional purine biosynthetic protein adenosine-3 [Rattus norvegicus], gi 109493898 ref XP_001068637.1  PREDICTED: similar to Trifuncti                            | 108 | 57 | 22 | 14 | 21 | 36 |
| 366 | phosphoribosylaminoimidazole carboxylase, phosphoribosylaminoimidazole succinocarboxamide synthetase [Rattus norvegicus], gi 1709928 sp P51583.3 PUR6_RAT RecName: Full=Multifunctional protein ADE2; Includes: RecName: Full=Phosphoribosylaminoimidazole-succ                            | 47  | 86 | 4  | 11 | 12 | 74 |
| 367 | SAR1a gene homolog [Mus musculus], gi 56090263 ref NP_001007740.1  SAR1a gene homolog 1 [Rattus norvegicus], gi 13542685 gb AAH05549.1  SAR1 gene homolog A (S. cerevisiae) [Mus musculus], gi 50925795 gb AAH79228.1  SAR1 homolog A (S. cerevisiae) [Rattus n                            | 22  | 82 | 19 | 0  | 6  | 76 |
| 368 | Aldehyde dehydrogenase 1 family, member L1 [Rattus norvegicus]                                                                                                                                                                                                                             | 99  | 60 | 17 | 23 | 28 | 32 |
| 369 | Obg-like ATPase 1 [Rattus norvegicus], gi 215275692 sp A0JPJ7.1 OLA1_RAT RecName: Full=Obg-like ATPase 1, gi 117558623 gb AAI27458.1  Obg-like ATPase 1 [Rattus norvegicus]                                                                                                                | 45  | 67 | 19 | 24 | 30 | 37 |
| 370 | cytoplasmic FMR1 interacting protein 1 [Rattus norvegicus], gi 149031480 gb EDL86460.1  cytoplasmic FMR1 interacting protein 1 (predicted) [Rattus norvegicus]                                                                                                                             | 145 | 74 | 6  | 17 | 19 | 55 |
| 371 | PREDICTED: hypothetical protein [Rattus norvegicus], gi 109489722 ref XP_001079214.1  PREDICTED: hypothetical protein [Rattus norvegicus]                                                                                                                                                  | 33  | 63 | 37 | 6  | 18 | 45 |
| 372 | erythrocyte protein band 4.1-like 1 isoform L [Rattus norvegicus], gi 4587120 dbj BAA76625.1  rat brain 4.1(L) [Rattus norvegicus]                                                                                                                                                         | 171 | 57 | 20 | 15 | 21 | 36 |
| 373 | Proteasome (prosome, macropain) subunit, beta type 1 [Rattus norvegicus], gi 149047099 gb EDL99819.1  proteasome (prosome, macropain) subunit, beta type 1, isoform CRA_a [Rattus norvegicus]                                                                                              | 26  | 76 | 22 | 0  | 7  | 69 |
| 374 | tumor protein, translationally-controlled 1 [Mus musculus], gi 16758734 ref NP_446319.1  tumor protein, translationally-controlled 1 [Rattus norvegicus], gi 149255389 ref XP_001480708.1  PREDICTED: hypothetical protein [Mus musculus], gi 149255783 ref XP_                            | 19  | 84 | 16 | 4  | 9  | 75 |
| 375 | tropomyosin 4 [Rattus norvegicus], gi 136081 sp P09495.3 TM4_RAT RecName: Full=Tropomyosin alpha-4 chain; AltName: Full=Tropomyosin-4; Short=TM-4, gi 207504 gb AAA42291.1  tropomyosin TM4, gi 763182 emb CAA68360.1  fibroblast tropomyosin 4 [Rattus norveg                             | 29  | 51 | 45 | 0  | 14 | 37 |
| 376 | glypican, gi 38181579 gb AAH61572.1  Gpc1 protein [Rattus norvegicus]                                                                                                                                                                                                                      | 62  | 95 | 0  | 0  | 0  | 95 |
| 377 | PREDICTED: similar to low density lipoprotein receptor-related protein 1 [Rattus norvegicus], gi 109482078 ref XP_001056970.1  PREDICTED: similar to low density lipoprotein receptor-related protein 1 [Rattus norvegicus], gi 149066587 gb EDM16460.1  rCG595                            | 505 | 86 | 0  | 0  | 0  | 86 |
| 378 | contactin 1 [Rattus norvegicus], gi 17432928 sp Q63198.2 CNTN1_RAT RecName: Full=Contactin-1; AltName: Full=Neural cell surface protein F3; Flags: Precursor, gi 1498194 dbj BAA07504.1  F3 [Rattus norvegicus], gi 149017608 gb EDL76612.1  contactin 1 [Rattu                            | 113 | 83 | 4  | 4  | 5  | 78 |
| 379 | guanine nucleotide binding protein (G protein), beta polypeptide 2-like 1 [Homo sapiens], gi 6680047 ref NP_032169.1  guanine nucleotide binding protein (G protein), beta polypeptide 2 like 1 [Mus musculus], gi 28461223 ref NP_786996.1  guanine nucleotide                            | 35  | 81 | 7  | 12 | 14 | 67 |
| 380 | nascent-polypeptide-associated complex alpha polypeptide (predicted), isoform CRA_c [Rattus norvegicus]                                                                                                                                                                                    | 15  | 52 | 45 | 8  | 22 | 30 |
| 381 | similar to Dendritic cell protein GA17 (predicted) [Rattus norvegicus]                                                                                                                                                                                                                     | 43  | 65 | 0  | 35 | 35 | 30 |
| 382 | proteasome (prosome, macropain) subunit, alpha type 5 [Mus musculus], gi 23110942 ref NP_002781.2  proteasome alpha 5 subunit [Homo sapiens], gi 62751982 ref NP_001015566.1  proteasome (prosome, macropain) subunit, alpha type, 5 [Bos taurus], gi 222136590                            | 26  | 66 | 17 | 4  | 9  | 57 |
| 383 | serine/threonine kinase receptor associated protein [Rattus norvegicus], gi 81883769 sp Q5XIG8.1 STRAP_RAT RecName: Full=Serine-threonine kinase receptor-associated protein; AltName: Full=UNR-interacting protein, gi 53733514 gb AAH83714.1  Serine/threonin                            | 38  | 57 | 17 | 16 | 21 | 36 |
| 384 | glutathione S-transferase mu 5 [Rattus norvegicus], gi 81917962 sp Q9Z1B2.3 GSTM5_RAT RecName: Full=Glutathione S-transferase Mu 5; AltName: Full=GST class-mu 5, gi 4099365 gb AAD00603.1  glutathione S-transferase M5 [Rattus norvegicus], gi 149025650 gb E                            | 27  | 50 | 23 | 7  | 14 | 36 |





|     |                                                                                                                                                                                                                                                                  |                   |     |    |    |    |    |    |
|-----|------------------------------------------------------------------------------------------------------------------------------------------------------------------------------------------------------------------------------------------------------------------|-------------------|-----|----|----|----|----|----|
| 440 | cullin 1 [Mus musculus], gi 157820743 ref NP_001102097.1  cullin 1 [Rattus norvegicus], gi 224044991 ref XP_002198372.1  PREDICTED: hypothetical protein [Taeniopygia guttata], gi 13124104 sp Q9W7X6.1 CUL1_MOUSE RecName: Full=Cullin-1; Short=CUL-1, gi 5815  | gi 7549752        | 90  | 67 | 7  | 12 | 14 | 53 |
| 441 | rCG41048, isoform CRA_a [Rattus norvegicus]                                                                                                                                                                                                                      | gi 149029060      | 441 | 54 | 4  | 22 | 23 | 31 |
| 442 | ribosomal protein S3 [Mus musculus], gi 57164151 ref NP_001009239.1  ribosomal protein S3 [Rattus norvegicus], gi 57102362 ref XP_534008.1  PREDICTED: similar to 40S ribosomal protein S3 isoform 1 [Canis familiaris], gi 73987935 ref XP_849947.1  PREDICTED  | gi 6755372        | 27  | 62 | 8  | 12 | 15 | 47 |
| 443 | hypothetical protein LOC23601 [Mus musculus], gi 187282120 ref NP_001119739.1  hypothetical protein LOC299909 [Rattus norvegicus], gi 52782789 sp Q921M7.1 FA49B_MOUSE RecName: Full=Protein FAM49B, gi 15030175 gb AAH11343.1  Fam49b protein [Mus musculus]    | gi 21450053       | 37  | 34 | 50 | 2  | 18 | 16 |
| 444 | proteasome (prosome, macropain) subunit, beta type 5 [Rattus norvegicus], gi 149063910 gb EDM14180.1  proteasome (prosome, macropain) subunit, beta type 5, isoform CRA_a [Rattus norvegicus]                                                                    | gi 160333293      | 29  | 76 | 9  | 0  | 3  | 73 |
| 445 | COP9 constitutive photomorphogenic homolog subunit 6 [Rattus norvegicus], gi 149028519 gb EDL83891.1  COP9 (constitutive photomorphogenic) homolog, subunit 6 (Arabidopsis thaliana) (predicted), isoform CRA_a [Rattus norvegicus]                              | gi 157821399      | 38  | 61 | 7  | 14 | 16 | 45 |
| 446 | Chain A, Annexin V Complex With Heparin Oligosaccharides, gi 126030730 pdb 2IE6 A Chain A, Annexin V Under 2.0 Mpa Pressure Of Xenon, gi 126030731 pdb 2IE7 A Chain A, Annexin V Under 2.0 Mpa Pressure Of Nitrous Oxide, gi 157829732 pdb 1A8A A Chain A, Rat   | gi 14488466 (+2)  | 36  | 48 | 11 | 21 | 24 | 24 |
| 447 | cullin-associated and neddylation-dissociated 2 (putative), isoform CRA_c [Rattus norvegicus]                                                                                                                                                                    | gi 149049691 (+1) | 136 | 37 | 33 | 6  | 16 | 21 |
| 448 | proteasome (prosome, macropain) subunit, alpha type 1 [Rattus norvegicus], gi 130849 sp P18420.2 PSA1_RAT RecName: Full=Proteasome subunit alpha type-1; AltName: Full=Proteasome component C2; AltName: Full=Macropain subunit C2; AltName: Full=Multicatalyti  | gi 8394060        | 30  | 62 | 16 | 0  | 5  | 57 |
| 449 | PREDICTED: similar to Histone deacetylase 6 (HD6) (Histone deacetylase mHDA2) [Rattus norvegicus], gi 109511550 ref XP_001057931.1  PREDICTED: similar to Histone deacetylase 6 (HD6) (Histone deacetylase mHDA2) [Rattus norvegicus]                            | gi 109510484      | 125 | 62 | 14 | 6  | 10 | 52 |
| 450 | hypothetical protein LOC681996 [Rattus norvegicus], gi 149025274 gb EDL81641.1  rCG20659, isoform CRA_b [Rattus norvegicus], gi 165970860 gb AAI58699.1  LOC681996 protein [Rattus norvegicus]                                                                   | gi 169234816      | 38  | 53 | 22 | 7  | 14 | 39 |
| 451 | moesin, isoform CRA_a [Rattus norvegicus]                                                                                                                                                                                                                        | gi 149042266      | 68  | 55 | 18 | 2  | 8  | 47 |
| 452 | RecName: Full=6-phosphogluconate dehydrogenase, decarboxylating, gi 149024656 gb EDL81153.1  rCG31394, isoform CRA_a [Rattus norvegicus]                                                                                                                         | gi 205686170      | 53  | 53 | 26 | 3  | 11 | 42 |
| 453 | proteasome (prosome, macropain) subunit, alpha type 6 [Rattus norvegicus], gi 23110944 ref NP_002782.1  proteasome alpha 6 subunit [Homo sapiens], gi 114053135 ref NP_001039422.1  proteasome (prosome, macropain) subunit, alpha type, 6 [Bos taurus], gi 556  | gi 8394076        | 27  | 75 | 3  | 2  | 3  | 72 |
| 454 | chloride intracellular channel 1 [Rattus norvegicus], gi 81911115 sp Q6MG61.1 CLIC1_RAT RecName: Full=Chloride intracellular channel protein 1, gi 46237607 emb CAE83985.1  chloride intracellular channel 1 [Rattus norvegicus], gi 17122383 gb AAH99823.1  Ch  | gi 50657380       | 27  | 43 | 32 | 6  | 16 | 27 |
| 455 | eukaryotic translation initiation factor 2, subunit 1 alpha [Rattus norvegicus], gi 13385624 ref NP_080390.1  eukaryotic translation initiation factor 2, subunit 1 alpha [Mus musculus], gi 28461253 ref NP_787007.1  eukaryotic translation initiation factor  | gi 9506571        | 36  | 59 | 21 | 3  | 10 | 49 |
| 456 | synaptotagmin 1, isoform CRA_a [Rattus norvegicus]                                                                                                                                                                                                               | gi 149059817 (+3) | 145 | 45 | 21 | 6  | 13 | 32 |
| 457 | ATP synthase, H+ transporting, mitochondrial F1 complex, beta polypeptide, isoform CRA_a [Rattus norvegicus]                                                                                                                                                     | gi 149029718 (+1) | 56  | 58 | 2  | 10 | 11 | 47 |
| 458 | hypothetical protein LOC364073 [Rattus norvegicus], gi 149040979 gb EDL94936.1  rCG20177 [Rattus norvegicus]                                                                                                                                                     | gi 157819755      | 73  | 56 | 6  | 22 | 24 | 32 |
| 459 | heat shock protein 5 [Rattus norvegicus], gi 121574 sp P06761.1 GRP78_RAT RecName: Full=78 kDa glucose-regulated protein; AltName: Full=GRP 78; AltName: Full=Heat shock 70 kDa protein 5; AltName: Full=Immunoglobulin heavy chain-binding protein; Short=BiP;  | gi 25742763       | 72  | 78 | 0  | 0  | 0  | 78 |
| 460 | F-actin capping protein alpha-1 subunit [Rattus norvegicus], gi 109467357 ref XP_001068917.1  PREDICTED: similar to capping protein (actin filament) muscle Z-line, alpha 1 [Rattus norvegicus], gi 205690878 sp B2GUZ5.1 CAZA1_RAT RecName: Full=F-actin-cappi  | gi 161086978      | 33  | 45 | 28 | 4  | 13 | 32 |
| 461 | RecName: Full=Protein disulfide-isomerase A3; AltName: Full=Disulfide isomerase ER-60; AltName: Full=ERp60; AltName: Full=58 kDa microsomal protein; AltName: Full=p58; AltName: Full=ERp57; AltName: Full=HIP-70; AltName: Full=Q-2; Flags: Precursor, gi 3838  | gi 1352384 (+1)   | 57  | 70 | 2  | 0  | 1  | 69 |
| 462 | Dcps protein [Rattus norvegicus]                                                                                                                                                                                                                                 | gi 59808733 (+1)  | 38  | 44 | 21 | 19 | 26 | 18 |
| 463 | calnexin [Rattus norvegicus], gi 543922 sp P35565.1 CALX_RAT RecName: Full=Calnexin; Flags: Precursor, gi 310085 gb AAA21015.1  calnexin [Rattus sp.], gi 149052451 gb EDM04268.1  calnexin, isoform CRA_a [Rattus norvegicus], gi 149052452 gb EDM04269.1  cal  | gi 25282419       | 67  | 69 | 2  | 8  | 9  | 60 |
| 464 | rCG25653, isoform CRA_g [Rattus norvegicus]                                                                                                                                                                                                                      | gi 149018243 (+1) | 28  | 74 | 2  | 14 | 15 | 59 |
| 465 | hypothetical protein LOC301742 [Rattus norvegicus], gi 149065190 gb EDM15266.1  similar to Coatomer gamma-2 subunit (Gamma-2 coat protein) (Gamma-2 COP) (predicted) [Rattus norvegicus]                                                                         | gi 157817775      | 98  | 63 | 2  | 13 | 14 | 49 |
| 466 | Phosphofructokinase, muscle [Rattus norvegicus], gi 149032171 gb EDL87083.1  phosphofructokinase, muscle, isoform CRA_a [Rattus norvegicus], gi 149032172 gb EDL87084.1  phosphofructokinase, muscle, isoform CRA_a [Rattus norvegicus], gi 149032173 gb EDL870  | gi 62825891       | 85  | 74 | 2  | 4  | 5  | 69 |
| 467 | CDC23 (cell division cycle 23, yeast, homolog), isoform CRA_b [Rattus norvegicus]                                                                                                                                                                                | gi 149017186 (+1) | 66  | 49 | 0  | 26 | 26 | 23 |
| 468 | proteasome (prosome, macropain) 26S subunit, non-ATPase, 5 (predicted), isoform CRA_a [Rattus norvegicus]                                                                                                                                                        | gi 149038941      | 56  | 61 | 6  | 12 | 14 | 47 |
| 469 | adenosine monophosphate deaminase 2 (isoform L) [Rattus norvegicus], gi 226801521 sp Q02356.2 AMPD2_RAT RecName: Full=AMP deaminase 2; AltName: Full=AMP deaminase isoform L, gi 149025670 gb EDL81913.1  similar to adenosine monophosphate deaminase 2 (isofo  | gi 156119591      | 95  | 52 | 4  | 12 | 13 | 39 |
| 470 | translin [Rattus norvegicus], gi 6136059 sp P97891.1 TSN_CRIGR RecName: Full=Translin, gi 9652067 gb AAF91387.1 AF262356_1 translin [Rattus norvegicus], gi 1770102 emb CAA66669.1  translin [Cricetus griseus], gi 149033085 gb EDL87903.1  translin [Rattus    | gi 11120712 (+1)  | 26  | 45 | 28 | 0  | 9  | 36 |
| 471 | actin, beta-like 2 [Rattus norvegicus], gi 149059329 gb EDM10336.1  similar to cytoplasmic beta-actin (predicted) [Rattus norvegicus]                                                                                                                            | gi 157823033      | 42  | 16 | 12 | 2  | 6  | 10 |
| 472 | rCG61772, isoform CRA_a [Rattus norvegicus]                                                                                                                                                                                                                      | gi 149051518 (+3) | 84  | 71 | 3  | 2  | 3  | 68 |
| 473 | cytosolic branched chain aminotransferase [Rattus norvegicus], gi 149048991 gb EDM01445.1  branched chain aminotransferase 1, cytosolic, isoform CRA_a [Rattus norvegicus]                                                                                       | gi 13374912 (+4)  | 45  | 53 | 16 | 8  | 13 | 40 |
| 474 | rCG38907, isoform CRA_b [Rattus norvegicus]                                                                                                                                                                                                                      | gi 149031314      | 94  | 45 | 9  | 21 | 24 | 21 |
| 475 | Arhgef7 protein [Rattus norvegicus]                                                                                                                                                                                                                              | gi 126362051      | 82  | 45 | 0  | 17 | 17 | 28 |
| 476 | RecName: Full=Farnesyl pyrophosphate synthetase; Short=FPP synthetase; Short=FPS; AltName: Full=Farnesyl diphosphate synthetase; AltName: Full=Cholesterol-regulated 39 kDa protein; Short=CR 39; Includes: RecName: Full=Dimethylallyltransferase; Includ       | gi 120478 (+2)    | 41  | 36 | 48 | 0  | 15 | 21 |
| 477 | RAB5A, member RAS oncogene family [Rattus norvegicus], gi 3309068 gb AAC26004.1  small GTP-binding protein rab5 [Rattus norvegicus], gi 149027113 gb EDL82849.1  RAB5A, member RAS oncogene family [Rattus norvegicus], gi 171847366 gb AAI61848.1  Rab5a prote  | gi 12083645       | 24  | 61 | 18 | 3  | 9  | 52 |
| 478 | RAP1, GTP-GDP dissociation stimulator 1 (predicted), isoform CRA_a [Rattus norvegicus]                                                                                                                                                                           | gi 149026086 (+1) | 58  | 46 | 11 | 15 | 18 | 28 |
| 479 | vesicle-fusing ATPase [Rattus norvegicus], gi 81917630 sp Q9QUL6.1 NSF_RAT RecName: Full=Vesicle-fusing ATPase; AltName: Full=N-ethylmaleimide-sensitive fusion protein; Short=NEM-sensitive fusion protein; AltName: Full=Vesicular-fusion protein NSF, gi 508  | gi 13489067 (+2)  | 83  | 58 | 0  | 10 | 10 | 48 |
| 480 | COP9 (constitutive photomorphogenic) homolog, subunit 7a (Arabidopsis thaliana) (predicted) [Rattus norvegicus]                                                                                                                                                  | gi 149049450      | 30  | 66 | 5  | 14 | 16 | 50 |
| 481 | Cdc42 effector, short isoform [Rattus norvegicus]                                                                                                                                                                                                                | gi 87299586       | 64  | 70 | 0  | 4  | 4  | 66 |
| 482 | myosin Ib [Rattus norvegicus], gi 13431669 sp Q05096.1 MYO1B_RAT RecName: Full=Myosin-Ib; AltName: Full=Myosin I alpha; AltName: Full=MMI-alpha; Short=MMIA; AltName: Full=Myosin heavy chain myr 1, gi 567333 emb CAA48287.1  myosin I heavy chain [Rattus norv | gi 16758890 (+1)  | 132 | 46 | 20 | 11 | 17 | 29 |
| 483 | MAP-kinase activating death domain [Rattus norvegicus], gi 81861041 sp O08873.1 MADD_RAT RecName: Full=MAP kinase-activating death domain protein; AltName: Full=Rab3 GDP/GTP exchange factor, gi 1947050 gb AAC53149.1  Rab3 GDP/GTP exchange protein [Rattus   | gi 16758360       | 178 | 28 | 27 | 12 | 21 | 7  |
| 484 | RAB3C, member RAS oncogene family [Mus musculus], gi 51338595 sp P62824.1 RAB3C_RAT RecName: Full=Ras-related protein Rab-3C, gi 51338605 sp P62823.1 RAB3C_MOUSE RecName: Full=Ras-related protein Rab-3C, gi 12597437 gb AAG60047.1 AF312037_1 small GTP bind  | gi 13470090 (+1)  | 26  | 61 | 10 | 0  | 3  | 58 |
| 485 | hemoglobin beta chain complex [Rattus norvegicus], gi 122514 sp P02091.3 HBB1_RAT RecName: Full=Hemoglobin subunit beta-1; AltName: Full=Hemoglobin beta-1 chain; AltName: Full=Beta-1-globin; AltName: Full=Hemoglobin beta chain, major-form, gi 55823 emb CA  | gi 17985949       | 16  | 54 | 15 | 0  | 5  | 49 |
| 486 | rCG27987, isoform CRA_a [Rattus norvegicus]                                                                                                                                                                                                                      | gi 149065081 (+3) | 176 | 69 | 1  | 0  | 0  | 69 |
| 487 | heat shock protein 4 like [Rattus norvegicus], gi 149048788 gb EDM01329.1  heat shock 70kDa protein 4-like (predicted), isoform CRA_b [Rattus norvegicus], gi 195539870 gb AAI68157.1  Hspa4l protein [Rattus norvegicus]                                        | gi 197927441      | 94  | 32 | 40 | 6  | 19 | 13 |
| 488 | ATP-binding cassette, sub-family E (OABP), member 1 [Rattus norvegicus], gi 197098652 ref NP_001126534.1  ATP-binding cassette, sub-family E (OABP), member 1 [Pongo abelii], gi 55731829 emb CAH92618.1  hypothetical protein [Pongo abelii], gi 149037946 gb   | gi 157823309      | 67  | 58 | 1  | 20 | 20 | 38 |
| 489 | ribosomal protein S4                                                                                                                                                                                                                                             | gi 227229 (+1)    | 30  | 49 | 0  | 17 | 17 | 32 |
| 490 | eukaryotic translation elongation factor 1 delta [Rattus norvegicus], gi 51259466 gb AAH79391.1  Eukaryotic translation elongation factor 1 delta (guanine nucleotide exchange protein) [Rattus norvegicus]                                                      | gi 61556967       | 72  | 52 | 6  | 16 | 18 | 34 |
| 491 | acidic (leucine-rich) nuclear phosphoprotein 32 family, member B [Rattus norvegicus], gi 81917438 sp Q9EST6.1 AN32B_RAT RecName: Full=Acidic leucine-rich nuclear phosphoprotein 32 family member B; AltName: Full=Proliferation-related acidic leucine-rich pr  | gi 18777770       | 31  | 45 | 22 | 3  | 10 | 35 |
| 492 | COP9 constitutive photomorphogenic homolog subunit 8 [Rattus norvegicus], gi 55976171 sp Q6P429.1 CSN8_RAT RecName: Full=COP9 signalosome complex subunit 8; Short=Signalosome subunit 8; Short=SGN8; AltName: Full=JAB1-containing signalosome subunit 8; AltN  | gi 61557351       | 23  | 59 | 9  | 4  | 7  | 52 |
| 493 | sterile alpha and TIR motif containing 1 [Rattus norvegicus], gi 149053540 gb EDM05357.1  sterile alpha and TIR motif containing 1 (predicted) [Rattus norvegicus]                                                                                               | gi 157786658      | 80  | 64 | 1  | 16 | 16 | 48 |
| 494 | neuroblastoma ras oncogene [Rattus norvegicus], gi 464551 sp Q04970.1 RASN_RAT RecName: Full=GTPase NRas; AltName: Full=Transforming protein N-Ras; Flags: Precursor, gi 56769 emb CAA48460.1  p21 protein [Rattus norvegicus], gi 68534734 gb AAH98659.1  Neur  | gi 18158431       | 21  | 71 | 1  | 2  | 2  | 69 |



|     |                                                                                                                                                                                                                                                                       |                   |     |    |    |    |    |    |
|-----|-----------------------------------------------------------------------------------------------------------------------------------------------------------------------------------------------------------------------------------------------------------------------|-------------------|-----|----|----|----|----|----|
| 551 | cofilin 2, muscle [Mus musculus], gi 1168994 sp P45591.1 COF2_MOUSE RecName: Full=Cofilin-2; AltName: Full=Cofilin, muscle isoform, gi 498017 gb AAA37433.1  cofilin, gi 13938044 gb AAH07138.1  Cofilin 2, muscle [Mus musculus], gi 74151236 dbj BAE27737.1]        | gi 6671746        | 19  | 32 | 32 | 0  | 10 | 22 |
| 552 | RecName: Full=Matrin-3; AltName: Full=Nuclear scaffold protein p130/MAT3, gi 2276402 gb AAB63955.1  matrin 3 [Rattus norvegicus]                                                                                                                                      | gi 12643398 (+1)  | 94  | 43 | 4  | 11 | 12 | 31 |
| 553 | PREDICTED: similar to Filamin-C (Gamma-filamin) (Filamin-2) (Protein FLNc) (Actin-binding-like protein) (ABP-L) (ABP-280-like protein) isoform 3 [Rattus norvegicus]                                                                                                  | gi 109473203 (+1) | 287 | 25 | 33 | 5  | 15 | 10 |
| 554 | PREDICTED: similar to Ubiquitin carboxyl-terminal hydrolase 24 (Ubiquitin thioesterase 24) (Ubiquitin-specific-processing protease 24) (Deubiquitinating enzyme 24) [Rattus norvegicus], gi 109476934 ref XP_001064937.1  PREDICTED: similar to Ubiquitin carb        | gi 109475211      | 235 | 36 | 13 | 12 | 16 | 20 |
| 555 | nuclear receptor binding protein [Rattus norvegicus], gi 74356247 gb AAI04695.1  Nuclear receptor binding protein [Rattus norvegicus], gi 149050746 gb EDM02919.1  nuclear receptor binding protein [Rattus norvegicus]                                               | gi 78042609       | 60  | 31 | 16 | 15 | 20 | 11 |
| 556 | PREDICTED: similar to Hook-related protein 1 [Rattus norvegicus]                                                                                                                                                                                                      | gi 109501126      | 212 | 28 | 23 | 3  | 10 | 18 |
| 557 | ADP-ribosylation factor-like 2 [Rattus norvegicus], gi 3182914 sp O08697.1 ARL2_RAT RecName: Full=ADP-ribosylation factor-like protein 2, gi 2062133 emb CAA73245.1  ADP-ribosylation factor-like protein [Rattus norvegicus]                                         | gi 13928996 (+1)  | 21  | 41 | 25 | 0  | 8  | 33 |
| 558 | anaphase-promoting complex subunit 5 (predicted) [Rattus norvegicus]                                                                                                                                                                                                  | gi 149063341      | 83  | 37 | 4  | 18 | 19 | 18 |
| 559 | UDP-glucose pyrophosphorylase 2 [Rattus norvegicus], gi 66910575 gb AAH97369.1  UDP-glucose pyrophosphorylase 2 [Rattus norvegicus], gi 149044770 gb EDL97956.1  UDP-glucose pyrophosphorylase 2, isoform CRA_b [Rattus norvegicus]                                   | gi 67078526       | 57  | 55 | 5  | 2  | 4  | 51 |
| 560 | RAB5B, member RAS oncogene family [Rattus norvegicus], gi 120537414 gb AAI29102.1  RAB5B, member RAS oncogene family [Rattus norvegicus], gi 149029654 gb EDL84825.1  RAB5B, member RAS oncogene family (predicted), isoform CRA_c [Rattus norvegicus]                | gi 121583768      | 24  | 50 | 15 | 4  | 9  | 41 |
| 561 | glutathione transferase zeta 1 [Rattus norvegicus], gi 149025260 gb EDL81627.1  rCG20683, isoform CRA_b [Rattus norvegicus], gi 165971039 gb AAI58834.1  Glutathione transferase zeta 1 [Rattus norvegicus], gi 208969735 gb ACI32127.1  glutathione S-transfer       | gi 157822229      | 24  | 41 | 20 | 7  | 13 | 28 |
| 562 | calcium channel, voltage-dependent, alpha2/delta subunit 1 isoform 2 [Rattus norvegicus], gi 27450704 gb AAO14652.1 AF486276_1 calcium channel alpha-2 delta-1 subunit isoform e [Rattus norvegicus]                                                                  | gi 161086906 (+1) | 123 | 61 | 0  | 5  | 5  | 56 |
| 563 | N-ethylmaleimide-sensitive factor attachment protein, alpha [Rattus norvegicus], gi 6094309 sp P54921.2 SNAAT_RAT RecName: Full=Alpha-soluble NSF attachment protein; Short=SNAP-alpha; AltName: Full=N-ethylmaleimide-sensitive factor attachment protein alpha      | gi 18034791       | 33  | 52 | 2  | 8  | 9  | 43 |
| 564 | proteasome (prosome, macropain) subunit, beta type 7 [Rattus norvegicus], gi 17380238 sp Q9JH00.1 PSB7_RAT RecName: Full=Proteasome subunit beta type-7; AltName: Full=Proteasome subunit Z; AltName: Full=Macropain chain Z; AltName: Full=Multicatalytic endo       | gi 16758298       | 30  | 56 | 9  | 3  | 6  | 50 |
| 565 | rCG26466, isoform CRA_b [Rattus norvegicus]                                                                                                                                                                                                                           | gi 149023210      | 143 | 44 | 0  | 10 | 10 | 34 |
| 566 | adaptor protein complex AP-2, mu1 [Mus musculus], gi 14917109 ref NP_004059.2  adaptor-related protein complex 2, mu 1 subunit isoform a [Homo sapiens], gi 16758938 ref NP_446289.1  adaptor-related protein complex 2, mu 1 subunit [Rattus norvegicus], gi 17      | gi 6753074        | 50  | 48 | 6  | 6  | 8  | 40 |
| 567 | lysophospholipase 2 [Rattus norvegicus], gi 41017253 sp Q9QYL8.1 LYPA2_RAT RecName: Full=Acyl-protein thioesterase 2; AltName: Full=Lysophospholipase II; AltName: Full=Lysophospholipase 2, gi 6518521 db BAA87911.1  lysophospholipase II [Rattus norvegicus]       | gi 13786178       | 25  | 23 | 28 | 4  | 13 | 10 |
| 568 | laminin, gamma 1 [Rattus norvegicus]                                                                                                                                                                                                                                  | gi 149058392 (+1) | 171 | 59 | 0  | 7  | 7  | 52 |
| 569 | aldo-keto reductase family 1, member B1 [Rattus norvegicus], gi 1168407 sp P07943.3 ALDR_RAT RecName: Full=Aldose reductase; Short=AR; AltName: Full=Aldehyde reductase, gi 155759 emb CAA29308.1  unnamed protein product [Rattus norvegicus], gi 202852 gb AAA      | gi 6978491        | 36  | 32 | 20 | 0  | 6  | 26 |
| 570 | ARPI actin-related protein 1 homolog B, centractin beta [Mus musculus], gi 166157502 ref NP_001034117.2  ARP1 actin-related protein 1 homolog B [Rattus norvegicus], gi 47115849 sp Q8R5C5.1 ACTY_MOUSE RecName: Full=Beta-centractin; AltName: Full=Actin-rela       | gi 22122615       | 42  | 47 | 0  | 13 | 13 | 34 |
| 571 | RAN binding protein 1 [Rattus norvegicus], gi 149019779 gb EDL77927.1  rCG36598 [Rattus norvegicus]                                                                                                                                                                   | gi 157820113      | 24  | 34 | 12 | 0  | 4  | 30 |
| 572 | small glutamine-rich tetratricopeptide repeat (TPR)-containing, alpha [Rattus norvegicus], gi 8134664 sp O70593.1 SGTA_RAT RecName: Full=Small glutamine-rich tetratricopeptide repeat-containing protein alpha; AltName: Full=Alpha-SGT; AltName: Full=Small g       | gi 12083667       | 24  | 43 | 24 | 0  | 8  | 35 |
| 573 | eukaryotic translation elongation factor 1 epsilon 1 [Rattus norvegicus], gi 149045165 gb EDL98251.1  rCG43901 [Rattus norvegicus], gi 187469479 gb AAI66841.1  Eukaryotic translation elongation factor 1 epsilon 1 [Rattus norvegicus]                              | gi 157816879      | 20  | 54 | 3  | 0  | 1  | 53 |
| 574 | anaphase promoting complex subunit 4 [Rattus norvegicus], gi 149047211 gb EDL99880.1  anaphase promoting complex subunit 4, isoform CRA_a [Rattus norvegicus]                                                                                                         | gi 157821679      | 92  | 49 | 0  | 9  | 9  | 40 |
| 575 | ADP-ribosylation factor-like 1 [Rattus norvegicus], gi 153792526 ref NP_080135.2  ADP-ribosylation factor-like 1 [Mus musculus], gi 47117641 sp P61212.1 ARL1_RAT RecName: Full=ADP-ribosylation factor-like protein 1, gi 47117662 sp P61211.1 ARL1_MOUSE RecN       | gi 11693150 (+2)  | 20  | 41 | 21 | 0  | 7  | 34 |
| 576 | Rab6 interacting protein 2, isoform CRA_c [Rattus norvegicus]                                                                                                                                                                                                         | gi 149049598      | 125 | 48 | 5  | 1  | 3  | 45 |
| 577 | glycoprotein m6a [Rattus norvegicus], gi 28201133 dbj BAC56699.1  glycoprotein m6a [Rattus norvegicus], gi 57032815 gb AAH88862.1  Glycoprotein m6a [Rattus norvegicus], gi 149021493 gb EDL78956.1  glycoprotein m6a, isoform CRA_b [Rattus norvegicus]              | gi 30017437       | 31  | 56 | 6  | 0  | 2  | 54 |
| 578 | vacuolar protein sorting 53 homolog [Rattus norvegicus], gi 149053432 gb EDM05249.1  vacuolar protein sorting 53 (yeast) (predicted), isoform CRA_a [Rattus norvegicus]                                                                                               | gi 157786652      | 94  | 46 | 0  | 13 | 13 | 33 |
| 579 | Vdac1 protein [Rattus norvegicus]                                                                                                                                                                                                                                     | gi 38051979 (+1)  | 32  | 49 | 2  | 6  | 7  | 42 |
| 580 | phenylalanyl-tRNA synthetase, alpha subunit [Rattus norvegicus], gi 81887353 sp Q505J8.1 SYFA_RAT RecName: Full=Phenylalanyl-tRNA synthetase alpha chain; AltName: Full=Phenylalanine--tRNA ligase alpha chain; Short=PheRS, gi 63101487 gb AAH94515.1  Phenyla       | gi 66730413       | 58  | 37 | 0  | 19 | 19 | 18 |
| 581 | hemoglobin alpha 2 chain [Rattus norvegicus], gi 1304381 gb AAA99054.1  hemoglobin alpha chain, gi 3367720 emb CAA46476.1  alpha-2-globin chain [Rattus norvegicus], gi 3367722 emb CAA39764.1  2-alpha-globin [Rattus norvegicus], gi 60688619 gb AAH91567.1]        | gi 60678292 (+1)  | 15  | 62 | 1  | 0  | 0  | 62 |
| 582 | transportin 3 [Rattus norvegicus], gi 149065154 gb EDM15230.1  transportin 3 [Rattus norvegicus]                                                                                                                                                                      | gi 157819279      | 104 | 30 | 16 | 6  | 11 | 19 |
| 583 | WAS protein family, member 1 [Rattus norvegicus], gi 81882530 sp Q5BJU7.1 WASF1_RAT RecName: Full=Wiskott-Aldrich syndrome protein family member 1; Short=WASP family protein member 1; AltName: Full=Protein WAVE-1, gi 60551504 gb AAH91322.1  WAS protein fa       | gi 68341973       | 62  | 50 | 1  | 9  | 9  | 41 |
| 584 | rCG59652, isoform CRA_b [Rattus norvegicus]                                                                                                                                                                                                                           | gi 149065835      | 63  | 32 | 31 | 1  | 11 | 21 |
| 585 | spermidine synthase [Rattus norvegicus], gi 13384156 gb AAK21288.1 AF337636_1 spermidine synthase [Rattus norvegicus], gi 118763718 gb AAI28734.1  Spermidine synthase [Rattus norvegicus]                                                                            | gi 16758208       | 34  | 23 | 31 | 2  | 12 | 11 |
| 586 | aminopeptidase-B [Rattus norvegicus]                                                                                                                                                                                                                                  | gi 1754515 (+1)   | 73  | 45 | 15 | 0  | 5  | 40 |
| 587 | DEAD (Asp-Glu-Ala-Asp) box polypeptide 1 [Rattus norvegicus], gi 76364171 sp Q641Y8.1 DDX1_RAT RecName: Full=ATP-dependent RNA helicase DDX1; AltName: Full=DEAD box protein 1, gi 51980333 gb AAH82049.1  DEAD (Asp-Glu-Ala-Asp) box polypeptide 1 [Rattus nor       | gi 61097941       | 82  | 33 | 2  | 15 | 16 | 17 |
| 588 | ribosomal protein S7 [Homo sapiens], gi 6755376 ref NP_035430.1  ribosomal protein S7 [Mus musculus], gi 57618938 ref NP_001009832.1  ribosomal protein S7 [Felis catus], gi 149642623 ref NP_001092344.1  ribosomal protein S7 [Bos taurus], gi 201862122 ref        | gi 4506741        | 22  | 44 | 0  | 8  | 8  | 36 |
| 589 | prenylcysteine oxidase 1 [Rattus norvegicus], gi 62286984 sp Q99ML5.1 PCYOX_RAT RecName: Full=Prenylcysteine oxidase; AltName: Full=Chloride ion pump-associated 55 kDa protein; Flags: Precursor, gi 13242075 gb IAAK16548.1 AF332142_1 chloride ion pump-assoc      | gi 21489987       | 56  | 62 | 0  | 0  | 0  | 62 |
| 590 | SEC13 homolog [Rattus norvegicus], gi 81910340 sp Q5XFW8.1 SEC13_RAT RecName: Full=Protein SEC13 homolog; AltName: Full=SEC13-like protein 1, gi 54261633 gb AAH84705.1  SEC13 homolog (S. cerevisiae) [Rattus norvegicus], gi 149036942 gb EDL91560.1  SEC13-1       | gi 55741774       | 36  | 33 | 11 | 12 | 15 | 18 |
| 591 | poly(A) binding protein, cytoplasmic 1 [Rattus norvegicus], gi 47605941 sp Q9EPH8.1 PABP1_RAT RecName: Full=Polyadenylate-binding protein 1; Short=Poly(A)-binding protein 1; Short=PABP_1, gi 12188891 emb CAC21554.1  poly(A) binding protein [Rattus norvegicus]   | gi 19705459       | 71  | 52 | 4  | 6  | 7  | 45 |
| 592 | RecName: Full=UMP-CMP kinase; AltName: Full=Cytidylylate kinase; AltName: Full=Deoxycytidylylate kinase; AltName: Full=Cytidine monophosphate kinase; AltName: Full=Uridine monophosphate kinase; AltName: Full=Uridine monophosphate/cytidine monophosphate kinase   | gi 150383503      | 22  | 36 | 21 | 0  | 7  | 29 |
| 593 | glypican 4 [Rattus norvegicus], gi 51980590 gb AAH81962.1  Glypican 4 [Rattus norvegicus]                                                                                                                                                                             | gi 62078949       | 63  | 53 | 0  | 5  | 5  | 48 |
| 594 | ezzrin [Rattus norvegicus], gi 68067388 sp P31977.3 EZRI_RAT RecName: Full=Ezrin; AltName: Full=p81; AltName: Full=Cytovillin; AltName: Full=Villin-2, gi 51858695 gb AAH81958.1  Ezrin [Rattus norvegicus], gi 149028296 gb EDL83712.1  villin 2 [Rattus norvegicus] | gi 52138521       | 69  | 44 | 12 | 0  | 4  | 40 |
| 595 | PREDICTED: similar to Ubiquitin-protein ligase EDD1 (Hyperplastic discs protein homolog) [Rattus norvegicus]                                                                                                                                                          | gi 109480712 (+1) | 307 | 43 | 1  | 13 | 13 | 30 |
| 596 | PREDICTED: similar to talin 2 isoform 2 [Rattus norvegicus]                                                                                                                                                                                                           | gi 109484980 (+2) | 272 | 33 | 14 | 7  | 11 | 22 |
| 597 | acidic ribosomal phosphoprotein P0 [Rattus norvegicus], gi 730581 sp P19945.2 RLA0_RAT RecName: Full=60S acidic ribosomal protein P0; AltName: Full=L10E, gi 450370 emb CAA82647.1  acidic ribosomal protein P0 [Rattus norvegicus], gi 38541406 gb AAH62028.1]       | gi 11693176       | 34  | 35 | 10 | 16 | 19 | 16 |
| 598 | biliverdin reductase A [Rattus norvegicus], gi 1168674 sp P46844.1 BIEA_RAT RecName: Full=Biliverdin reductase A; Short=BVR A; AltName: Full=Biliverdin-IX alpha-reductase; Flags: Precursor, gi 13096101 pdb 1GCU A Chain A, Crystal Structure Of Rat Biliverd       | gi 16758714 (+1)  | 34  | 27 | 22 | 6  | 13 | 14 |
| 599 | amphiphysin [Rattus norvegicus], gi 14916529 sp O08838.1 AMPH_RAT RecName: Full=Amphiphysin, gi 2145467 emb CAA73808.1  amphiphysin [Rattus norvegicus]                                                                                                               | gi 11560002       | 75  | 48 | 2  | 10 | 11 | 37 |
| 600 | dynein cytoplasmic 1 intermediate chain 1, isoform CRA_a [Rattus norvegicus]                                                                                                                                                                                          | gi 149064950 (+2) | 71  | 45 | 2  | 10 | 11 | 34 |
| 601 | PREDICTED: similar to Heterogeneous nuclear ribonucleoprotein L-like [Rattus norvegicus], gi 109478941 ref XP_001063027.1  PREDICTED: similar to Heterogeneous nuclear ribonucleoprotein L-like [Rattus norvegicus]                                                   | gi 109477851      | 85  | 36 | 3  | 14 | 15 | 21 |
| 602 | nuclear distribution gene C homolog [Rattus norvegicus], gi 62286960 sp Q63525.1 NUDC_RAT RecName: Full=Nuclear migration protein nudC; AltName: Full=Nuclear distribution protein C homolog; AltName: Full=c15, gi 619907 emb CAA57825.1  RnudC [Rattus norvegicus]  | gi 8394272        | 38  | 37 | 28 | 1  | 10 | 27 |
| 603 | enolase 2, gamma, neuronal [Rattus norvegicus], gi 119349 sp P07323.2 ENOG_RAT RecName: Full=Gamma-enolase; AltName: Full=2-phospho-D-glycerate hydro-lyase; AltName: Full=Neural enolase; AltName: Full=Neuron-specific enolase; Short=NSE; AltName: Full=Enol       | gi 26023949       | 47  | 51 | 8  | 0  | 3  | 48 |



|     |                                                                                                                                                                                                                                                                          |                   |     |    |    |    |    |    |
|-----|--------------------------------------------------------------------------------------------------------------------------------------------------------------------------------------------------------------------------------------------------------------------------|-------------------|-----|----|----|----|----|----|
| 659 | GTP binding protein 1 (predicted), isoform CRA_a [Rattus norvegicus]                                                                                                                                                                                                     | gi 149065914      | 72  | 30 | 8  | 11 | 14 | 16 |
| 660 | biliverdin reductase B (flavin reductase (NADPH)) [Rattus norvegicus], gi 149056526 gb EDM07957.1  biliverdin reductase B (flavin reductase (NADPH)) (predicted), isoform CRA_b [Rattus norvegicus], gi 197246855 gb AAI68943.1  Biliverdin reductase B (flavin          | gi 157819619      | 22  | 29 | 19 | 6  | 12 | 17 |
| 661 | rCG51764, isoform CRA_d [Rattus norvegicus]                                                                                                                                                                                                                              | gi 149030542      | 284 | 32 | 0  | 3  | 3  | 29 |
| 662 | hook homolog 3 [Rattus norvegicus], gi 149057834 gb EDM09077.1  hook homolog 3 (Drosophila) [Rattus norvegicus]                                                                                                                                                          | gi 209869999      | 83  | 40 | 4  | 11 | 12 | 28 |
| 663 | Sjogren's syndrome/scleroderma autoantigen 1 homolog [Rattus norvegicus], gi 109463401 ref XP_001074570.1  PREDICTED: similar to C184L-22 [Rattus norvegicus], gi 149062103 gb EDM12526.1  mammary tumor virus receptor 2, isoform CRA_a [Rattus norvegicus], g          | gi 157817574      | 21  | 30 | 8  | 12 | 15 | 15 |
| 664 | microtubule-associated protein 1A, isoform CRA_c [Rattus norvegicus]                                                                                                                                                                                                     | gi 149023090      | 300 | 27 | 0  | 17 | 17 | 10 |
| 665 | histone cluster 3, H2ba [Mus musculus], gi 162138978 ref NP_001104597.1  histone cluster 3, H2ba [Rattus norvegicus], gi 109490813 ref XP_001076753.1  PREDICTED: similar to histone 3, H2ba [Rattus norvegicus], gi 81881288 sp Q9D2U9.3 H2B3A_MOUSE RecName:           | gi 13386452       | 14  | 43 | 10 | 0  | 3  | 40 |
| 666 | ribosomal protein S10 [Mus musculus], gi 13592069 ref NP_112371.1  ribosomal protein S10 [Rattus norvegicus], gi 54039307 sp P63326.1 RS10_RAT RecName: Full=40S ribosomal protein S10, gi 54039315 sp P63325.1 RS10_MOUSE RecName: Full=40S ribosomal protein           | gi 13399310 (+1)  | 19  | 49 | 4  | 0  | 1  | 48 |
| 667 | adaptor-related protein complex 2, alpha 1 subunit [Rattus norvegicus], gi 149056010 gb EDM07441.1  adaptor protein complex AP-2, alpha 1 subunit (predicted) [Rattus norvegicus]                                                                                        | gi 157823677      | 108 | 43 | 1  | 8  | 8  | 35 |
| 668 | GNAS complex locus GNASL [Rattus norvegicus], gi 117959930 ref NP_963910.1  GNAS complex locus GNASL [Mus musculus], gi 52000956 sp P63095.1 GNAS2_RAT RecName: Full=Guanine nucleotide-binding protein G(s) subunit alpha isoforms short; AltName: Full=Adeny]          | gi 9506737        | 46  | 40 | 0  | 4  | 4  | 36 |
| 669 | karyopherin (importin) beta 1 [Rattus norvegicus]                                                                                                                                                                                                                        | gi 149054034      | 81  | 43 | 3  | 3  | 4  | 39 |
| 670 | WD repeat domain 47 [Rattus norvegicus], gi 149025707 gb EDL81950.1  rCG28460 [Rattus norvegicus]                                                                                                                                                                        | gi 215276960      | 102 | 24 | 7  | 12 | 14 | 10 |
| 671 | ubiquitin specific protease 14 [Rattus norvegicus], gi 55250780 gb AAH85947.1  Ubiquitin specific peptidase 14 [Rattus norvegicus], gi 149031713 gb EDL86663.1  ubiquitin specific protease 14 [Rattus norvegicus]                                                       | gi 56605688       | 56  | 45 | 1  | 6  | 6  | 39 |
| 672 | RecName: Full=Glutathione S-transferase omega-1; AltName: Full=GSTO 1-1; AltName: Full=Glutathione-dependent dehydroascorbate reductase, gi 208969725 gb ACI32122.1  glutathione S-transferase omega 1 [Rattus norvegicus]                                               | gi 12585231 (+1)  | 28  | 25 | 23 | 0  | 7  | 18 |
| 673 | glycoprotein, synaptic 2 [Rattus norvegicus], gi 20177913 sp Q64232.1 GPN2_RAT RecName: Full=Synaptic glycoprotein SC2; AltName: Full=Trans-2,3-enoyl-CoA reductase; Short=TER, gi 2144098 pir I156573 synaptic glycoprotein SC2 [imported] - rat, gi 256994 g           | gi 19924091 (+1)  | 36  | 13 | 0  | 4  | 4  | 9  |
| 674 | ADP-ribosylation factor 4 [Mus musculus], gi 13162343 ref NP_077065.1  ADP-ribosylation factor 4 [Rattus norvegicus], gi 48428789 sp P61751.2 ARF4_RAT RecName: Full=ADP-ribosylation factor 4, gi 48428790 sp P61750.2 ARF4_MOUSE RecName: Full=ADP-ribosylati          | gi 6680720        | 20  | 25 | 25 | 0  | 8  | 17 |
| 675 | vacuolar protein sorting 29 [Rattus norvegicus], gi 224493432 sp B2R278.2 VPS29_RAT RecName: Full=Vacuolar protein sorting-associated protein 29; AltName: Full=Vesicle protein sorting 29, gi 149063370 gb EDM13693.1  vacuolar protein sorting 29 (S. pombe)           | gi 157786944      | 20  | 46 | 4  | 0  | 1  | 45 |
| 676 | PREDICTED: similar to DNA-directed RNA polymerase II largest subunit (RPB1) [Rattus norvegicus], gi 109491096 ref XP_001079162.1  PREDICTED: similar to DNA-directed RNA polymerase II largest subunit (RPB1) [Rattus norvegicus]                                        | gi 109488292      | 217 | 40 | 0  | 16 | 16 | 24 |
| 677 | Abelson helper integration site 1 [Rattus norvegicus], gi 73921661 sp Q6DTM3.1 AH11_RAT RecName: Full=Jouberin; AltName: Full=Abelson helper integration site 1 protein homolog; Short=AH1-1, gi 49615316 gb AAT66919.1  AH11 [Rattus norvegicus]                        | gi 50511316       | 120 | 35 | 4  | 12 | 13 | 22 |
| 678 | ubiquitin-activating enzyme 3 [Rattus norvegicus], gi 50401223 sp Q99M17.1 UBA3_RAT RecName: Full=NEDD8-activating enzyme E1 catalytic subunit; AltName: Full=Ubiquitin-like modifier-activating enzyme 3; Short=Ubiquitin-activating enzyme 3; AltName: Full=N          | gi 17105358       | 52  | 35 | 11 | 7  | 10 | 25 |
| 679 | ubiquitin-like modifier activating enzyme 6 [Rattus norvegicus], gi 149035136 gb EDL89840.1  similar to RIKEN cDNA 5730469D23 (predicted) [Rattus norvegicus]                                                                                                            | gi 157821599      | 118 | 15 | 14 | 5  | 9  | 6  |
| 680 | RecName: Full=Purine nucleoside phosphorylase; Short=PNP; AltName: Full=Inosine phosphorylase, gi 149033633 gb EDL88431.1  nucleoside phosphorylase (mapped), isoform CRA_c [Rattus norvegicus]                                                                          | gi 205829287      | 32  | 30 | 20 | 4  | 10 | 20 |
| 681 | cyclin-dependent kinase 5 [Rattus norvegicus], gi 416783 sp Q03114.1 CDK5_RAT RecName: Full=Cell division protein kinase 5; AltName: Full=Cyclin-dependent kinase 5; AltName: Full=Tau protein kinase II catalytic subunit; Short=TPKII catalytic subunit; AltN          | gi 18266682       | 33  | 29 | 11 | 7  | 10 | 19 |
| 682 | PREDICTED: similar to plexin A1 [Rattus norvegicus]                                                                                                                                                                                                                      | gi 109473842 (+1) | 211 | 33 | 0  | 5  | 5  | 28 |
| 683 | RuvB-like protein 2 [Mus musculus], gi 149757860 ref XP_001490235.1  PREDICTED: similar to DNA helicase isoform 1 [Equus caballus], gi 30316329 sp Q9WTM5.3 RUVB2_MOUSE RecName: Full=RuvB-like 2; AltName: Full=p47 protein, gi 45122419 dbj BAA76297.1  DNA he         | gi 6755382 (+1)   | 51  | 35 | 9  | 5  | 8  | 27 |
| 684 | immunity-related GTPase family, Q (predicted) [Rattus norvegicus]                                                                                                                                                                                                        | gi 149056658      | 34  | 29 | 26 | 0  | 8  | 21 |
| 685 | keratin 2 [Rattus norvegicus], gi 81891699 sp Q6IG02.1 K22E_RAT RecName: Full=Keratin, type II cytoskeletal 2 epidermal; AltName: Full=Cytokeratin-2e; Short=CK 2e; Short=K2e; Short=keratin-2; AltName: Full=Type II keratin Kb2, gi 46485118 tpg DAA02228.1            | gi 57114290       | 69  | 24 | 24 | 0  | 8  | 16 |
| 686 | PREDICTED: similar to protein phosphatase methyltransferase 1 [Rattus norvegicus], gi 109462506 ref XP_001066863.1  PREDICTED: similar to protein phosphatase methyltransferase 1 [Rattus norvegicus], gi 149068800 gb EDM18352.1  protein phosphatase methyltransferase | gi 62641013       | 42  | 29 | 11 | 5  | 8  | 21 |
| 687 | triple functional domain (PTRF interacting) [Rattus norvegicus], gi 149026481 gb EDL82631.1  triple functional domain (PTRF interacting) [Rattus norvegicus]                                                                                                             | gi 157821177      | 176 | 33 | 9  | 6  | 9  | 24 |
| 688 | leucine rich repeat containing 47 (predicted) [Rattus norvegicus]                                                                                                                                                                                                        | gi 149024755      | 61  | 33 | 0  | 12 | 12 | 21 |
| 689 | mitogen-activated protein kinase kinase 6 [Rattus norvegicus], gi 14039930 gb AAK53428.1 AF369384_1 mitogen-activated protein kinase kinase 6 [Rattus norvegicus], gi 56270321 gb AAH87004.1  Mitogen-activated protein kinase kinase 6 [Rattus norvegicus], gi          | gi 16758520       | 37  | 16 | 17 | 5  | 10 | 6  |
| 690 | malignant T cell amplified sequence 1 [Rattus norvegicus], gi 123781859 sp Q4G009.1 MCT51_RAT RecName: Full=Malignant T cell amplified sequence 1; Short=MCT-1, gi 71051757 gb AAH98848.1  Malignant T cell amplified sequence 1 [Rattus norvegicus], gi 742105          | gi 112984244 (+1) | 21  | 38 | 10 | 0  | 3  | 35 |
| 691 | ubiquitin specific protease 47 (predicted), isoform CRA_b [Rattus norvegicus]                                                                                                                                                                                            | gi 149068273 (+1) | 91  | 19 | 26 | 10 | 18 | 1  |
| 692 | S-phase kinase-associated protein 1 [Rattus norvegicus], gi 158854016 ref NP_035673.3  S-phase kinase-associated protein 1A [Mus musculus], gi 213512347 ref NP_001134437.1  S-phase kinase-associated protein 1 [Salmo salar], gi 54036436 sp Q6PECA.3 SKP1_RA          | gi 56090425       | 19  | 28 | 19 | 0  | 6  | 27 |
| 693 | proteasome (prosome, macropain) subunit, beta type 4 [Rattus norvegicus]                                                                                                                                                                                                 | gi 149030731      | 29  | 37 | 13 | 0  | 4  | 33 |
| 694 | growth associated protein 43 [Rattus norvegicus], gi 128102 sp P07936.1 NEUM_RAT RecName: Full=Neuromodulin; AltName: Full=Axonal membrane protein GAP-43; AltName: Full=Growth-associated protein 43; AltName: Full=Protein F1, gi 56128 emb CAA29644.1  unnam          | gi 8393415        | 24  | 42 | 0  | 1  | 1  | 41 |
| 695 | rCG61105 [Rattus norvegicus]                                                                                                                                                                                                                                             | gi 149043586      | 35  | 27 | 14 | 1  | 5  | 22 |
| 696 | COP9 constitutive photomorphogenic homolog subunit 2 isoform 1 [Homo sapiens], gi 23463271 ref NP_695209.1  COP9 constitutive photomorphogenic homolog subunit 2 [Rattus norvegicus], gi 70909327 ref NP_034069.2  COP9 (constitutive photomorphogenic) homolog          | gi 4759264        | 52  | 41 | 0  | 3  | 3  | 38 |
| 697 | zinc responsive protein ZD10B [Rattus norvegicus], gi 51260031 gb AAH79094.1  DEAD (Asp-Glu-Ala-Asp) box polypeptide 19a [Rattus norvegicus]                                                                                                                             | gi 77628154       | 54  | 26 | 9  | 9  | 12 | 14 |
| 698 | minichromosome maintenance complex component 5 [Rattus norvegicus], gi 149032486 gb EDL87377.1  minichromosome maintenance deficient 5, cell division cycle 46 (S. cerevisiae) (predicted) [Rattus norvegicus]                                                           | gi 157823053      | 40  | 36 | 3  | 9  | 10 | 26 |
| 699 | eukaryotic translation initiation factor 3, subunit J [Rattus norvegicus], gi 109468723 ref XP_001080279.1  PREDICTED: similar to Eukaryotic translation initiation factor 3 subunit 1 (eIF-3 alpha) [Rattus norvegicus], gi 187471123 sp A0JPM9.1 EIF3J_RAT Re          | gi 117940021      | 29  | 44 | 5  | 0  | 2  | 42 |
| 700 | RecName: Full=Tryptophanyl-tRNA synthetase, cytoplasmic; AltName: Full=Tryptophan--tRNA ligase; Short=TrpRS                                                                                                                                                              | gi 125991198 (+1) | 54  | 22 | 28 | 0  | 9  | 13 |
| 701 | pannexin 1 [Rattus norvegicus], gi 45476996 sp P60570.1 PANX1_RAT RecName: Full=Pannexin-1, gi 39930152 emb CAD89522.1  Pannexin 1 [Rattus norvegicus], gi 149020650 gb EDL78455.1  Pannexin 1 [Rattus norvegicus]                                                       | gi 40786483       | 48  | 30 | 0  | 15 | 15 | 15 |
| 702 | mitogen-activated protein kinase kinase kinase 4 [Rattus norvegicus], gi 149046291 gb EDL99184.1  mitogen-activated protein kinase kinase kinase 4 (predicted) [Rattus norvegicus]                                                                                       | gi 157819181      | 135 | 16 | 11 | 7  | 10 | 6  |
| 703 | tropomodulin 2 [Rattus norvegicus], gi 23396879 sp P70566.1 TMOD2_RAT RecName: Full=Tropomodulin-2; AltName: Full=Neuronal tropomodulin; Short=N-Tmod, gi 1628559 gb AAC52854.1  N-tropomodulin, gi 149019141 gb EDL77782.1  tropomodulin 2, isoform CRA_a [Rat          | gi 13928838       | 39  | 29 | 17 | 3  | 8  | 21 |
| 704 | NEDD8 activating enzyme E1 subunit 1 [Rattus norvegicus]                                                                                                                                                                                                                 | gi 118850964 (+1) | 60  | 29 | 7  | 8  | 10 | 19 |
| 705 | fermitin family homolog 2 [Rattus norvegicus], gi 53733599 gb AAH83876.1  Fermitin family homolog 2 (Drosophila) [Rattus norvegicus], gi 149033509 gb EDL88307.1  rCG61183, isoform CRA_b [Rattus norvegicus]                                                            | gi 58865400       | 78  | 34 | 7  | 8  | 10 | 24 |
| 706 | DnaJ (Hsp40) homolog, subfamily A, member 1 [Mus musculus], gi 12621094 ref NP_075223.1  DnaJ-like protein 2 [Rattus norvegicus], gi 51702257 sp P63036.1 DNJA1_RAT RecName: Full=DnaJ homolog subfamily A member 1; AltName: Full=DnaJ-like protein 1, gi 5170          | gi 6680297        | 45  | 40 | 0  | 9  | 9  | 31 |
| 707 | cysteine-rich protein 2 [Rattus norvegicus], gi 544102 sp P36201.1 CRIP2_RAT RecName: Full=Cysteine-rich protein 2; Short=CRP2; AltName: Full=Protein ESP1, gi 487284 dbj BAA04464.1  cysteine-rich protein 2 [Rattus norvegicus], gi 38511602 gb AAH61774.1  C          | gi 11968068       | 23  | 30 | 12 | 7  | 11 | 19 |
| 708 | PREDICTED: similar to importin 11 isoform 2 [Rattus norvegicus]                                                                                                                                                                                                          | gi 109465901 (+1) | 113 | 40 | 4  | 5  | 6  | 34 |
| 709 | proteasome (prosome, macropain) subunit, beta type 2 [Rattus norvegicus], gi 730377 sp P40307.1 PSB2_RAT RecName: Full=Proteasome subunit beta type-2; AltName: Full=Proteasome component C7-1; AltName: Full=Macropain subunit C7-1; AltName: Full=Multicataly          | gi 8394079        | 23  | 39 | 4  | 0  | 1  | 38 |
| 710 | enolase-phosphatase 1 [Rattus norvegicus], gi 81883193 sp Q5PPH0.1 ENOPH_RAT RecName: Full=Enolase-phosphatase E1; AltName: Full=2,3-diketo-5-methylthio-1-phosphopentane phosphatase; AltName: Full=MASA homolog, gi 56388604 gb AAH87697.1  Enolase-phosphata          | gi 57164119       | 29  | 25 | 18 | 0  | 6  | 19 |
| 711 | glyceraldehyde 3-phosphate dehydrogenase [Rattus norvegicus]                                                                                                                                                                                                             | gi 1675349        | 9   | 22 | 4  | 0  | 1  | 21 |
| 712 | keratin 83 [Rattus norvegicus], gi 155676725 dbj BAF7513.1  LOC681126 [Rattus norvegicus]                                                                                                                                                                                | gi 156119593      | 55  | 41 | 4  | 0  | 1  | 40 |
| 713 | stathmin-like 2 [Rattus norvegicus], gi 46397776 sp P21818.2 STMN2_RAT RecName: Full=Stathmin-2; AltName: Full=Superior cervical ganglion-10 protein; Short=Protein SCG10, gi 11228978 gb AAG32320.1 AF306458_1 SCG10 [Rattus norvegicus], gi 56585174 gb AAH87          | gi 16758184       | 21  | 31 | 10 | 2  | 5  | 26 |



|     |                                                                                                                                                                                                                                                                              |     |    |    |    |    |    |
|-----|------------------------------------------------------------------------------------------------------------------------------------------------------------------------------------------------------------------------------------------------------------------------------|-----|----|----|----|----|----|
| 768 | crystallin, mu [Rattus norvegicus], gi 48474729 sp Q9YU4.1 CRYM_REC Name: Full=Mu-crystallin homolog; AltName: Full=CDK108, gi 5931745 emb CAB56625.1  mu crystallin [Rattus norvegicus], gi 56789444 gb AAH8812.1  Crystallin, mu [Rattus norvegicus], gi                   | 34  | 13 | 27 | 0  | 9  | 4  |
| 769 | hexokinase 1 [Rattus norvegicus], gi 6226638 sp P05708.4 HXK1_REC Name: Full=Hexokinase-1; AltName: Full=Hexokinase type I; Short=HK I; AltName: Full=Brain form hexokinase, gi 157838283 pdb 1BG3 A Chain A, Rat Brain Hexokinase Type I Complex With Gluco                 | 102 | 38 | 7  | 0  | 2  | 36 |
| 770 | prefoldin 5 [Rattus norvegicus], gi 149031935 gb EDL86847.1  prefoldin 5 (predicted), isoform CRA_a [Rattus norvegicus], gi 197246197 gb AAI69128.1  Prefoldin subunit 5 [Rattus norvegicus]                                                                                 | 17  | 30 | 14 | 0  | 4  | 26 |
| 771 | Pgm1 protein [Rattus norvegicus]                                                                                                                                                                                                                                             | 63  | 18 | 24 | 0  | 8  | 10 |
| 772 | PREDICTED: similar to spermine synthase [Rattus norvegicus], gi 109471106 ref XP_001062228.1  PREDICTED: similar to spermine synthase [Rattus norvegicus], gi 149030940 gb EDL85967.1  rCG63119 [Rattus norvegicus]                                                          | 41  | 25 | 13 | 5  | 9  | 16 |
| 773 | PREDICTED: similar to SLIT-ROBO Rho GTPase-activating protein 1 [Rattus norvegicus], gi 109482032 ref XP_001053311.1  PREDICTED: similar to SLIT-ROBO Rho GTPase-activating protein 1 [Rattus norvegicus]                                                                    | 124 | 33 | 3  | 7  | 8  | 25 |
| 774 | CaBP1 [Rattus norvegicus]                                                                                                                                                                                                                                                    | 47  | 41 | 2  | 1  | 2  | 39 |
| 775 | voltage dependent anion channel [Rattus norvegicus]                                                                                                                                                                                                                          | 30  | 37 | 0  | 3  | 3  | 34 |
| 776 | plexin B2 [Rattus norvegicus], gi 149017545 gb EDL76549.1  plexin B2 [Rattus norvegicus]                                                                                                                                                                                     | 206 | 29 | 0  | 3  | 3  | 26 |
| 777 | hypothetical protein LOC683630 [Rattus norvegicus], gi 81883481 sp Q5U2R0.1 MAT2B_REC Name: Full=Methionine adenosyltransferase 2 subunit beta; AltName: Full=Methionine adenosyltransferase II beta; Short=MAT II beta; AltName: Full=Methionine adenosyltr                 | 37  | 29 | 2  | 4  | 5  | 24 |
| 778 | similar to chromosome 11 open reading frame2 (predicted), isoform CRA_a [Rattus norvegicus]                                                                                                                                                                                  | 86  | 35 | 2  | 6  | 7  | 28 |
| 779 | actin related protein 2/3 complex, subunit 3 [Rattus norvegicus], gi 149063364 gb EDM13687.1  actin related protein 2/3 complex, subunit 3 (predicted), isoform CRA_b [Rattus norvegicus], gi 183986078 gb AAI66554.1  Actin related protein 2/3 complex, subun              | 21  | 23 | 17 | 0  | 5  | 18 |
| 780 | transgelin 3 [Rattus norvegicus], gi 78214339 ref NP_113864.2  transgelin 3 [Rattus norvegicus], gi 124056477 sp P37805.2 TAGL3_REC Name: Full=Transgelin-3; AltName: Full=Neuronal protein NP25; AltName: Full=Neuronal protein 22; Short=NP22, gi 18252579                 | 23  | 29 | 15 | 0  | 5  | 24 |
| 781 | similar to hypothetical protein FLI20331, isoform CRA_b [Rattus norvegicus]                                                                                                                                                                                                  | 68  | 30 | 7  | 4  | 6  | 24 |
| 782 | glutamyl-prolyl-tRNA synthetase [Rattus norvegicus], gi 37654316 gb AAQ96263.1  LRRGT00050 [Rattus norvegicus]                                                                                                                                                               | 167 | 29 | 6  | 9  | 11 | 18 |
| 783 | glucose-6-phosphate dehydrogenase [Rattus norvegicus], gi 120733 sp P05370.3 G6PD_REC Name: Full=Glucose-6-phosphate 1-dehydrogenase; Short=G6PD, gi 56196 emb CAA30355.1  unnamed protein product [Rattus norvegicus], gi 51980296 gb AAH81820.1  Glucose-6                 | 59  | 24 | 11 | 0  | 3  | 21 |
| 784 | CHMP family, member 7 [Rattus norvegicus], gi 149049867 gb EDM02191.1  CHMP family, member 7 (predicted), isoform CRA_a [Rattus norvegicus]                                                                                                                                  | 31  | 30 | 8  | 4  | 7  | 23 |
| 785 | v-src sarcoma (Schmidt-Ruppin A-2) viral oncogene homolog [Rattus norvegicus], gi 8885998 gb AAF80335.1 AF157016_n neuronal C-SRC tyrosine-specific protein kinase [Rattus norvegicus], gi 149043101 gb EDL96675.1  Rous sarcoma oncogene, isoform CRA_a [Rattus norvegicus] | 61  | 35 | 0  | 7  | 7  | 28 |
| 786 | secretory carrier membrane protein 1 [Rattus norvegicus]                                                                                                                                                                                                                     | 34  | 39 | 1  | 4  | 4  | 35 |
| 787 | calcium channel, voltage-dependent, alpha 2/delta subunit 2 [Rattus norvegicus]                                                                                                                                                                                              | 131 | 28 | 0  | 10 | 10 | 18 |
| 788 | APEX nuclease 1 [Rattus norvegicus], gi 1168468 sp P43138.2 APEX1_REC Name: Full=DNA-(apurinic or pyrimidinic site) lyase; AltName: Full=Apurinic-apyrimidinic endonuclease 1; Short=AP endonuclease 1; AltName: Full=APEX nuclease; Short=APEN, gi 1187823                  | 36  | 6  | 31 | 3  | 13 | 0  |
| 789 | similar to receptor expression enhancing protein 2 [Rattus norvegicus], gi 111493967 gb AAI05631.1  Similar to receptor expression enhancing protein 2 [Rattus norvegicus]                                                                                                   | 28  | 37 | 0  | 8  | 8  | 29 |
| 790 | transaldolase [Rattus norvegicus]                                                                                                                                                                                                                                            | 37  | 10 | 32 | 0  | 10 | 0  |
| 791 | proline synthetase co-transcribed homolog [Rattus norvegicus], gi 149057846 gb EDM09089.1  proline synthetase co-transcribed (predicted) [Rattus norvegicus]                                                                                                                 | 30  | 25 | 13 | 4  | 8  | 17 |
| 792 | serine racemase [Rattus norvegicus], gi 81894104 sp Q76EQ0.1 SRR_REC Name: Full=Serine racemase, gi 34419178 db BAC84968.1  serine racemase [Rattus norvegicus], gi 51858725 gb AAH82014.1  Serine racemase [Rattus norvegicus], gi 149053378 gb EDM05195.1                  | 36  | 18 | 14 | 6  | 10 | 8  |
| 793 | Ras suppressor protein 1 [Mus musculus], gi 157821061 ref NP_00102874.1  Ras suppressor protein 1 [Rattus norvegicus], gi 109506192 ref XP_001072534.1  PREDICTED: similar to Ras suppressor protein 1 [Rattus norvegicus], gi 12848246 db BAB27884.1  unname                | 32  | 21 | 8  | 4  | 7  | 14 |
| 794 | Coenzyme A synthase [Rattus norvegicus], gi 54035300 gb AAH83781.1  Coenzyme A synthase [Rattus norvegicus]                                                                                                                                                                  | 61  | 15 | 7  | 4  | 6  | 9  |
| 795 | RecName: Full=Neogenin; Flags: Precursor, gi 1785999 gb AAB41100.1  neogenin [Rattus norvegicus]                                                                                                                                                                             | 151 | 29 | 4  | 0  | 1  | 28 |
| 796 | tripartite motif protein 3, isoform CRA_a [Rattus norvegicus], gi 149068479 gb EDM18031.1  tripartite motif protein 3, isoform CRA_a [Rattus norvegicus], gi 149068480 gb EDM18032.1  tripartite motif protein 3, isoform CRA_a [Rattus norvegicus], gi 1490684              | 81  | 23 | 4  | 10 | 11 | 12 |
| 797 | cell division cycle 42 isoform 2 [Homo sapiens], gi 56118450 ref NP_001008027.1  cell division cycle 42 (GTP binding protein, 25kDa) [Xenopus (Silurana) tropicalis], gi 108998912 ref XP_001100002.1  PREDICTED: similar to Cell division control protein 42 h              | 21  | 27 | 11 | 2  | 5  | 22 |
| 798 | PREDICTED: similar to proteasome (prosome, macropain) activator subunit 4 [Rattus norvegicus], gi 109501140 ref XP_001066053.1  PREDICTED: similar to proteasome (prosome, macropain) activator subunit 4 [Rattus norvegicus]                                                | 229 | 31 | 2  | 2  | 3  | 28 |
| 799 | Eph receptor B2 (predicted) [Rattus norvegicus]                                                                                                                                                                                                                              | 103 | 31 | 0  | 12 | 12 | 19 |
| 800 | growth factor receptor-bound protein 2 isoform 1 [Homo sapiens], gi 77539774 ref NP_110473.2  growth factor receptor bound protein 2 [Rattus norvegicus], gi 17736207 ref NP_001029802.1  growth factor receptor-bound protein 2 [Bos taurus], gi 197097744 ref              | 25  | 11 | 21 | 0  | 7  | 4  |
| 801 | v-crk sarcoma virus CT10 oncogene homolog [Rattus norvegicus], gi 2842661 sp Q63768.1 CRK_REC Name: Full=Proto-oncogene C-crk; AltName: Full=p38; AltName: Full=Adapter molecule crk, gi 119389392 pdb 2EY2 A Chain A, Ct10-Regulated Kinase Isoform Ii, gi                  | 34  | 15 | 25 | 0  | 8  | 7  |
| 802 | ADP-ribosylation-like factor 6 interacting protein 5 [Rattus norvegicus], gi 57012987 sp Q9E540.1 PRAF3_REC Name: Full=PRAF1 family protein 3; AltName: Full=ADP-ribosylation factor-like protein 6-interacting protein 5; Short=ARL-6-interacting protein 5;                | 22  | 39 | 1  | 0  | 0  | 39 |
| 803 | vesicle-associated membrane protein 2, isoform CRA_b [Rattus norvegicus]                                                                                                                                                                                                     | 15  | 44 | 0  | 0  | 0  | 44 |
| 804 | protein tyrosine phosphatase                                                                                                                                                                                                                                                 | 68  | 29 | 5  | 1  | 3  | 26 |
| 805 | eukaryotic translation initiation factor 6 [Rattus norvegicus], gi 76780089 gb AAI05765.1  Eukaryotic translation initiation factor 6 [Rattus norvegicus], gi 149030867 gb EDL85894.1  rCG37307, isoform CRA_b [Rattus norvegicus]                                           | 27  | 17 | 16 | 2  | 7  | 10 |
| 806 | chromatin modifying protein 5 [Mus musculus], gi 70912368 ref NP_001020581.1  chromatin modifying protein 5 [Rattus norvegicus], gi 51702143 sp Q9D7S9.1 CHMP5_MOUSE RecName: Full=Charged multivesicular body protein 5; AltName: Full=Chromatin-modifying pro              | 25  | 22 | 10 | 4  | 7  | 10 |
| 807 | oxidative-stress responsive 1 [Rattus norvegicus], gi 149018277 gb EDL76918.1  oxidative-stress responsive 1 (predicted) [Rattus norvegicus]                                                                                                                                 | 58  | 29 | 5  | 5  | 7  | 22 |
| 808 | v-crk sarcoma virus CT10 oncogene homolog (avian)-like [Rattus norvegicus], gi 81889657 sp Q5U2U2.1 CRKL_REC Name: Full=Crk-like protein, gi 55249763 gb AAH85865.1  V-crk sarcoma virus CT10 oncogene homolog (avian)-like [Rattus norvegicus], gi 14901974                 | 34  | 28 | 13 | 0  | 4  | 24 |
| 809 | septin 2 [Rattus norvegicus], gi 81902430 sp Q91Y81.1 SEPT2_REC Name: Full=Septin-2; AltName: Full=Vascular endothelial cell specific protein 11, gi 13928415 db BAB47151.1  vascular endothelial cell specific protein 11 [Rattus norvegicus], gi 51858574                  | 42  | 33 | 0  | 5  | 5  | 28 |
| 810 | PREDICTED: similar to coiled-coil domain containing 6 [Rattus norvegicus]                                                                                                                                                                                                    | 53  | 35 | 2  | 2  | 3  | 32 |
| 811 | suppression of tumorigenicity 13 [Rattus norvegicus], gi 226501346 ref NP_001141128.1  hypothetical protein LOC100273214 [Zea mays], gi 1708200 sp P50503.1 F10A1_REC Name: Full=Hsc70-interacting protein; Short=Hip; AltName: Full=Protein ST13 homolog; A                 | 41  | 22 | 13 | 0  | 4  | 18 |
| 812 | cullin 4B [Rattus norvegicus], gi 149060051 gb EDM10867.1  cullin 4B (predicted) [Rattus norvegicus]                                                                                                                                                                         | 111 | 29 | 2  | 9  | 10 | 19 |
| 813 | ubiquilin 1 [Rattus norvegicus], gi 47939201 gb AAH72477.1  Ubiquilin 1 [Rattus norvegicus], gi 149039802 gb EDL93918.1  ubiquilin 1, isoform CRA_a [Rattus norvegicus]                                                                                                      | 62  | 34 | 7  | 0  | 2  | 32 |
| 814 | WD-repeat protein [Mus musculus], gi 84000227 ref NP_001033214.1  WD repeat domain 68 [Bos taurus], gi 108936958 ref NP_005819.3  WD-repeat protein [Homo sapiens], gi 118405186 ref NP_001072972.1  WD repeat domain 68 [Gallus gallus], gi 157817648 ref NP_0              | 39  | 27 | 0  | 12 | 12 | 15 |
| 815 | nuclear cap binding protein subunit 1, 80kDa [Rattus norvegicus], gi 81882418 sp Q56A27.1 NCBP1_REC Name: Full=Nuclear cap-binding protein subunit 1, gi 62089490 gb AAH92199.1  Nuclear cap binding protein subunit 1, 80kDa [Rattus norvegicus], gi 149045                 | 92  | 42 | 1  | 0  | 0  | 42 |
| 816 | eukaryotic translation initiation factor 4 gamma, 2 [Rattus norvegicus]                                                                                                                                                                                                      | 102 | 31 | 0  | 8  | 8  | 23 |
| 817 | protein phosphatase 4, catalytic subunit [Homo sapiens], gi 9790175 ref NP_062648.1  protein phosphatase 4, catalytic subunit [Mus musculus], gi 154707914 ref NP_001092578.1  protein phosphatase 4, catalytic subunit [Bos taurus], gi 197101625 ref NP_00112              | 35  | 23 | 6  | 6  | 8  | 15 |
| 818 | PREDICTED: similar to Nucleolar phosphoprotein p130 (Nucleolar 130 kDa protein) (140 kDa nucleolar phosphoprotein) (Nopp140) (Nucleolar and coiled-body phosphoprotein 1) [Rattus norvegicus], gi 109500535 ref XP_001076105.1  PREDICTED: similar to Nucleolar              | 151 | 8  | 21 | 2  | 9  | 0  |
| 819 | signal recognition particle 68 [Rattus norvegicus], gi 149054841 gb EDM06658.1  signal recognition particle 68 (predicted) [Rattus norvegicus], gi 187469045 gb AAI66787.1  Signal recognition particle 68 [Rattus norvegicus]                                               | 70  | 25 | 2  | 7  | 8  | 17 |
| 820 | RecName: Full=Estradiol 17-beta-dehydrogenase 12; AltName: Full=17-beta-hydroxysteroid dehydrogenase 12; Short=17-beta-HSD 12; AltName: Full=3-ketoacyl-CoA reductase; Short=KAR, gi 38494210 gb AAH61543.1  Hsd17b12 protein [Rattus norvegicus], gi 149022712              | 35  | 31 | 0  | 6  | 6  | 25 |
| 821 | tyrosine hydroxylase [Rattus norvegicus], gi 136577 sp P04177.3 TYRH_REC Name: Full=Tyrosine 3-monoxygenase; AltName: Full=Tyrosine 3-hydroxylase; Short=TH, gi 207409 gb AAA42257.1  tyrosine hydroxylase (EC 1.14.16.2), gi 349098 gb AAA42258.1  tyrosin                  | 56  | 25 | 2  | 12 | 13 | 12 |
| 822 | rCG56483, isoform CRA_a [Rattus norvegicus]                                                                                                                                                                                                                                  | 47  | 30 | 1  | 7  | 7  | 23 |
| 823 | rCG57672 [Rattus norvegicus]                                                                                                                                                                                                                                                 | 77  | 32 | 0  | 7  | 7  | 25 |
| 824 | PDGF associated protein, gi 1589641 prf 2211382A platelet-derived growth factor-associated protein                                                                                                                                                                           | 21  | 29 | 10 | 0  | 3  | 26 |

|     |                                                                                                                                                                                                                                                                      |                   |     |    |    |    |    |    |
|-----|----------------------------------------------------------------------------------------------------------------------------------------------------------------------------------------------------------------------------------------------------------------------|-------------------|-----|----|----|----|----|----|
| 825 | RAB6B, member RAS oncogene family [Rattus norvegicus], gi 194221614 ref XP_001496020.2  PREDICTED: similar to RAB6B, member RAS oncogene family [Equus caballus], gi 149018752 gb EDL77393.1  RAB6B, member RAS oncogene family (predicted) [Rattus norvegicus]      | gi 157817539      | 20  | 32 | 6  | 0  | 2  | 30 |
| 826 | cell division cycle 37 homolog [Rattus norvegicus], gi 1197180 dbj BAA05618.1  unnamed protein product [Rattus norvegicus]                                                                                                                                           | gi 16758750 (+1)  | 44  | 31 | 9  | 0  | 3  | 28 |
| 827 | protein phosphatase 1, regulatory (inhibitor) subunit 14B [Rattus norvegicus], gi 62122946 ref NP_032915.2  protein phosphatase 1, regulatory (inhibitor) subunit 14B [Mus musculus], gi 55583766 sp Q8K3F3.1 PP14B_RAT RecName: Full=Protein phosphatase 1 reg      | gi 25282423       | 16  | 30 | 10 | 0  | 3  | 27 |
| 828 | RecName: Full=Neurexin-1-alpha; AltName: Full=Neurexin I-alpha; Flags: Precursor                                                                                                                                                                                     | gi 124106288 (+1) | 168 | 28 | 2  | 0  | 1  | 27 |
| 829 | WW domain binding protein 2, isoform CRA_b [Rattus norvegicus]                                                                                                                                                                                                       | gi 149054826      | 28  | 12 | 22 | 0  | 7  | 5  |
| 830 | RecName: Full=Glycogen synthase kinase-3 beta; Short=GSK-3 beta; AltName: Full=Factor A; Short=FA, gi 56334 emb CAA37519.1  unnamed protein product [Rattus norvegicus]                                                                                              | gi 125374 (+1)    | 47  | 31 | 1  | 7  | 7  | 24 |
| 831 | PREDICTED: similar to Signal recognition particle 72 kDa protein (SRP72) isoform 1 [Rattus norvegicus]                                                                                                                                                               | gi 109500449      | 66  | 17 | 1  | 9  | 9  | 8  |
| 832 | dipeptidylpeptidase 6 [Rattus norvegicus], gi 1169415 sp P46101.1 DPP6_RAT RecName: Full=Dipeptidyl aminopeptidase-like protein 6; AltName: Full=Dipeptidylpeptidase VI; AltName: Full=Dipeptidylpeptidase 6; AltName: Full=Dipeptidyl peptidase IV-like protei      | gi 12408298 (+1)  | 97  | 33 | 0  | 4  | 4  | 29 |
| 833 | hypothetical protein LOC689074 [Rattus norvegicus], gi 149015556 gb EDL74937.1  rCG58914 [Rattus norvegicus]                                                                                                                                                         | gi 221325616      | 137 | 17 | 9  | 7  | 10 | 7  |
| 834 | PREDICTED: similar to E3 ubiquitin-protein ligase NEDD4-like protein (Nedd4-2) (NEDD4-2) [Rattus norvegicus]                                                                                                                                                         | gi 109506712 (+1) | 109 | 16 | 8  | 6  | 9  | 7  |
| 835 | rCG51062, isoform CRA_b [Rattus norvegicus]                                                                                                                                                                                                                          | gi 149038022 (+1) | 32  | 19 | 0  | 6  | 6  | 13 |
| 836 | plexin A2 [Rattus norvegicus], gi 149041088 gb EDL95045.1  plexin A2 (predicted) [Rattus norvegicus]                                                                                                                                                                 | gi 157787093      | 126 | 39 | 0  | 2  | 2  | 37 |
| 837 | chloride channel, nucleotide-sensitive, 1A [Rattus norvegicus], gi 431451 gb AAC37642.1  regulatory protein, gi 38014703 gb AAH60555.1  Clns1a protein [Rattus norvegicus], gi 149068915 gb EDM18467.1  chloride channel, nucleotide-sensitive, 1A [Rattus norv      | gi 13929008       | 27  | 33 | 8  | 0  | 3  | 30 |
| 838 | ADP-ribosylarginine hydrolase [Rattus norvegicus]                                                                                                                                                                                                                    | gi 202759 (+1)    | 40  | 19 | 13 | 5  | 9  | 10 |
| 839 | RecName: Full=Plasma membrane calcium-transporting ATPase 1; Short=PMCA1; AltName: Full=Plasma membrane calcium ATPase isoform 1; AltName: Full=Plasma membrane calcium pump isoform 1                                                                               | gi 14286099 (+3)  | 139 | 29 | 0  | 8  | 8  | 21 |
| 840 | ATPase, Ca++ transporting, slow switch 2 isoform b [Rattus norvegicus], gi 57303 emb CAA33645.1  sarcoplasmic reticulum 2+-Ca-ATPase [Rattus norvegicus], gi 203059 gb AAA40786.1  non-muscle ATPase                                                                 | gi 158635975 (+1) | 110 | 27 | 0  | 9  | 9  | 18 |
| 841 | PREDICTED: similar to Ras-GTPase-activating protein binding protein 1 (ATP-dependent DNA helicase VIII) (GAP SH3-domain binding protein 1) (G3BP-1) (HDH-VIII) [Rattus norvegicus]                                                                                   | gi 109488113      | 59  | 28 | 2  | 10 | 11 | 17 |
| 842 | PREDICTED: similar to golgi-specific brefeldin A-resistance factor 1 [Rattus norvegicus], gi 109464034 ref XP_001066196.1  PREDICTED: similar to golgi-specific brefeldin A-resistance factor 1 [Rattus norvegicus]                                                  | gi 109460176 (+1) | 207 | 25 | 4  | 6  | 7  | 18 |
| 843 | phosphofurin acidic cluster sorting protein 1 [Rattus norvegicus], gi 52000740 sp O88588.1 PACS1_RAT RecName: Full=Phosphofurin acidic cluster sorting protein 1; Short=PACS-1, gi 3347953 gb AAC31815.1  cytosolic sorting protein PACS-1a [Rattus norvegicus]      | gi 19705535       | 105 | 30 | 0  | 2  | 2  | 28 |
| 844 | rCG36369, isoform CRA_a [Rattus norvegicus]                                                                                                                                                                                                                          | gi 149042203 (+2) | 24  | 24 | 10 | 0  | 3  | 21 |
| 845 | casein kinase 1, alpha 1, isoform CRA_e [Mus musculus], gi 149064403 gb EDM14606.1  casein kinase 1, alpha 1, isoform CRA_b [Rattus norvegicus]                                                                                                                      | gi 148677820 (+5) | 39  | 25 | 2  | 9  | 10 | 15 |
| 846 | synaptophysin [Rattus norvegicus], gi 135163 sp P07825.1 SYPH_RAT RecName: Full=Synaptophysin; AltName: Full=Major synaptic vesicle protein p38, gi 57322 emb CAA29543.1  unnamed protein product [Rattus norvegicus], gi 57326 emb CAA29685.1  unnamed protei       | gi 6981622        | 33  | 25 | 2  | 11 | 12 | 13 |
| 847 | glutamine fructose-6-phosphate transaminase 1, isoform CRA_a [Rattus norvegicus], gi 149036650 gb EDL91268.1  glutamine fructose-6-phosphate transaminase 1, isoform CRA_a [Rattus norvegicus]                                                                       | gi 149036649 (+1) | 79  | 25 | 2  | 11 | 12 | 13 |
| 848 | filamin, beta [Rattus norvegicus], gi 149040087 gb EDL94171.1  filamin, beta (predicted) [Rattus norvegicus]                                                                                                                                                         | gi 157818975      | 275 | 6  | 29 | 2  | 11 | 0  |
| 849 | ubiquitin specific peptidase 11 [Rattus norvegicus], gi 60422774 gb AAH90333.1  Ubiquitin specific peptidase 11 [Rattus norvegicus], gi 149044387 gb EDL97708.1  ubiquitin specific protease 11 [Rattus norvegicus]                                                  | gi 76443681       | 105 | 22 | 5  | 3  | 5  | 17 |
| 850 | echinoderm microtubule associated protein like 4 (predicted), isoform CRA_b [Rattus norvegicus]                                                                                                                                                                      | gi 149050563 (+1) | 94  | 23 | 0  | 4  | 4  | 19 |
| 851 | family with sequence similarity 49, member A [Rattus norvegicus], gi 149050934 gb EDM03107.1  similar to hypothetical protein DKFZ566A1524 (predicted) [Rattus norvegicus], gi 165971268 gb AAI58701.1  Family with sequence similarity 49, member A [Rattus n       | gi 157821991      | 37  | 8  | 30 | 0  | 9  | 0  |
| 852 | acylpeptide hydrolase, isoform CRA_a [Rattus norvegicus]                                                                                                                                                                                                             | gi 149018550 (+2) | 81  | 18 | 16 | 0  | 5  | 13 |
| 853 | RAB21, member RAS oncogene family [Rattus norvegicus], gi 81884468 sp Q6AXT5.1 RAB21_RAT RecName: Full=Ras-related protein Rab-21, gi 50927400 gb AAH79323.1  RAB21, member RAS oncogene family [Rattus norvegicus], gi 149066960 gb EDM16693.1  RAB21, member       | gi 51948448       | 24  | 31 | 6  | 2  | 4  | 27 |
| 854 | ribosomal protein S5, isoform CRA_b [Rattus norvegicus], gi 149016578 gb EDL75779.1  ribosomal protein S5, isoform CRA_b [Rattus norvegicus], gi 149016579 gb EDL75780.1  ribosomal protein S5, isoform CRA_b [Rattus norvegicus], gi 165970894 gb AAI58719.1        | gi 149016577      | 23  | 31 | 2  | 6  | 7  | 24 |
| 855 | PREDICTED: similar to Liprin-alpha-3 (Protein tyrosine phosphatase receptor type f polypeptide-interacting protein alpha-3) (PTRF-interacting protein alpha-3) [Rattus norvegicus], gi 109461924 ref XP_001080725.1  PREDICTED: similar to Liprin-alpha-3 (Pro       | gi 109458729 (+1) | 150 | 21 | 12 | 4  | 8  | 13 |
| 856 | PREDICTED: similar to formin-like 2 isoform B [Rattus norvegicus]                                                                                                                                                                                                    | gi 109468179 (+1) | 122 | 22 | 3  | 10 | 11 | 11 |
| 857 | insulin-degrading enzyme [Rattus norvegicus], gi 547706 sp P35559.1 IDE_RAT RecName: Full=Insulin-degrading enzyme; AltName: Full=Insulin protease; Short=Insulinase; AltName: Full=Insulysin, gi 56492 emb CAA47689.1  insulin-degrading enzyme [Rattus norveg      | gi 6981076        | 118 | 21 | 5  | 6  | 8  | 13 |
| 858 | eukaryotic translation initiation factor 4H [Rattus norvegicus], gi 81910358 sp Q5X172.1 IF4H_RAT RecName: Full=Eukaryotic translation initiation factor 4H; Short=eIF-4H; AltName: Full=Williams-Beuren syndrome chromosomal region 1 protein homolog, gi 5403      | gi 55741853       | 27  | 24 | 9  | 2  | 5  | 19 |
| 859 | protein tyrosine phosphatase, non-receptor type 23 [Rattus norvegicus], gi 3598974 gb AAC62959.1  protein tyrosine phosphatase TD14 [Rattus norvegicus]                                                                                                              | gi 29789309 (+1)  | 163 | 21 | 11 | 2  | 5  | 16 |
| 860 | rCG54570, isoform CRA_b [Rattus norvegicus]                                                                                                                                                                                                                          | gi 149055917 (+1) | 21  | 6  | 31 | 0  | 10 | 0  |
| 861 | PREDICTED: similar to Programmed cell death 6-interacting protein (ALG-2-interacting protein X) (ALG-2-interacting protein) (E2F1-inducible protein) (Eig2) [Rattus norvegicus], gi 205371813 sp Q9QZ2.2 PDCC61_RAT RecName: Full=Programmed cell death 6-int        | gi 109485522 (+1) | 97  | 17 | 14 | 0  | 4  | 13 |
| 862 | asparagine synthetase [Rattus norvegicus], gi 91771192 sp P49088.3 ASNS_RAT RecName: Full=Asparagine synthetase [glutamine-hydrolyzing]; AltName: Full=Glutamine-dependent asparagine synthetase, gi 51859420 gb AAH81719.1  Asn protein [Rattus norvegicus]         | gi 148747576 (+1) | 64  | 19 | 5  | 10 | 12 | 7  |
| 863 | early endosome antigen 1 [Rattus norvegicus], gi 149067114 gb EDM16847.1  early endosome antigen 1 (predicted) [Rattus norvegicus]                                                                                                                                   | gi 157821387      | 161 | 10 | 20 | 0  | 6  | 4  |
| 864 | PREDICTED: similar to Protein FAM40A [Rattus norvegicus]                                                                                                                                                                                                             | gi 109465351 (+3) | 99  | 15 | 6  | 8  | 10 | 5  |
| 865 | PREDICTED: similar to Histidine triad nucleotide-binding protein 1 (Adenosine 5-monophosphoramidase) (Protein kinase C inhibitor 1) (Protein kinase C-interacting protein 1) (PKCI-1) [Rattus norvegicus]                                                            | gi 109490737 (+1) | 21  | 36 | 0  | 0  | 0  | 36 |
| 866 | toll interacting protein [Rattus norvegicus], gi 160184946 sp A2RUW1.1 TOLIP_RAT RecName: Full=Toll-interacting protein, gi 124481578 gb AAI33068.1  Toll interacting protein [Rattus norvegicus], gi 149061684 gb EDM12107.1  toll interacting protein (predic      | gi 157823763      | 30  | 26 | 6  | 5  | 7  | 19 |
| 867 | TBC1 domain family, member 17 [Rattus norvegicus], gi 149056024 gb EDM07455.1  TBC1 domain family, member 17 (predicted) [Rattus norvegicus], gi 169642259 gb AAI60880.1  TBC1 domain family, member 17 [Rattus norvegicus]                                          | gi 157820129      | 73  | 24 | 6  | 4  | 6  | 18 |
| 868 | phosphoribosyl pyrophosphate synthetase 2 [Rattus norvegicus], gi 125584 sp P09330.3 PRPS2_RAT RecName: Full=Ribose-phosphate pyrophosphokinase 2; AltName: Full=Pyrophosphoribosyl pyrophosphate synthetase II; Short=PRPS-II, gi 56979 emb CAA34556.1  unnamed pro | gi 6981418        | 35  | 28 | 3  | 2  | 3  | 25 |
| 869 | APC-binding protein EB2 [Mus musculus], gi 56090319 ref NP_001007657.1  microtubule-associated protein, RP/EB family, member 3 [Rattus norvegicus], gi 60389846 sp Q5X1T1.1 MARE3_RAT RecName: Full=Microtubule-associated protein RP/EB family member 3; AltNa      | gi 39930509       | 32  | 29 | 6  | 2  | 4  | 25 |
| 870 | neurofibromin 1 [Rattus norvegicus], gi 13959414 sp P97526.1 NF1_RAT RecName: Full=Neurofibromin; AltName: Full=Neurofibromatosis-related protein NF-1, gi 1841314 dbj BAA08141.1  neurofibromin [Rattus norvegicus]                                                 | gi 6981264        | 317 | 25 | 0  | 7  | 7  | 18 |
| 871 | coronin, actin-binding protein, 1B, isoform CRA_a [Rattus norvegicus]                                                                                                                                                                                                | gi 149061951 (+1) | 54  | 23 | 8  | 6  | 9  | 14 |
| 872 | visinin-like 1 [Mus musculus], gi 21361559 ref NP_003376.2  visinin-like 1 [Homo sapiens], gi 27806195 ref NP_776915.1  visinin-like 1 [Bos taurus], gi 45383948 ref NP_990586.1  visinin-like 1 [Gallus gallus], gi 114576253 ref XP_001135378.1  PREDICTED: s      | gi 6755983        | 22  | 27 | 11 | 0  | 3  | 24 |
| 873 | similar to fibronectin type 3 and SPRY domain-containing protein, isoform CRA_a [Rattus norvegicus], gi 169642779 gb AAI60924.1  Fsd1 protein [Rattus norvegicus]                                                                                                    | gi 149028240      | 56  | 25 | 3  | 8  | 9  | 16 |
| 874 | RecName: Full=Annexin A6; AltName: Full=Annexin-6; AltName: Full=Annexin VI; AltName: Full=Calcium-binding protein 65/67; Short=CBP 65/67, gi 763181 emb CAA60040.1  annexin VI [Rattus norvegicus]                                                                  | gi 1351943        | 76  | 23 | 2  | 6  | 7  | 16 |
| 875 | basic leucine zipper and W2 domains 1 [Mus musculus], gi 38454312 ref NP_942084.1  basic leucine zipper and W2 domains 1 [Rattus norvegicus], gi 57110923 ref XP_536025.1  PREDICTED: similar to basic leucine zipper and W2 domains 1 isoform 2 [Canis familia      | gi 13385296       | 48  | 31 | 0  | 2  | 2  | 29 |
| 876 | thyroid hormone receptor interactor 12 [Rattus norvegicus], gi 71681048 gb AAI00625.1  Thyroid hormone receptor interactor 12 [Rattus norvegicus]                                                                                                                    | gi 72535136       | 218 | 14 | 16 | 5  | 10 | 4  |
| 877 | lin 7 homolog c [Mus musculus], gi 8922944 ref NP_060832.1  lin-7 homolog c [Homo sapiens], gi 11177888 ref NP_068623.1  lin-7 homolog c [Rattus norvegicus], gi 115495593 ref NP_001068899.1  lin-7 homolog c [Bos taurus], gi 197100117 ref NP_001125773.1  l      | gi 6755923        | 22  | 24 | 2  | 0  | 1  | 23 |
| 878 | WD repeat domain 61 [Rattus norvegicus], gi 81907874 sp Q4V7A0.1 WDR61_RAT RecName: Full=WD repeat-containing protein 61, gi 66910939 gb AAH98059.1  WD repeat domain 61 [Rattus norvegicus], gi 149041708 gb EDL95549.1  WD repeat domain 61 [Rattus norvegicus]    | gi 71043902       | 34  | 26 | 3  | 9  | 10 | 16 |
| 879 | ras homolog gene family, member B [Homo sapiens], gi 6680726 ref NP_031509.1  ras homolog gene family, member B [Mus musculus], gi 11968136 ref NP_071987.1  ras homolog gene family, member B [Rattus norvegicus], gi 118150946 ref NP_001071390.1  ras homolo      | gi 4757764        | 22  | 33 | 2  | 0  | 1  | 32 |
| 880 | N-acetylglucosamine kinase [Rattus norvegicus], gi 119364611 sp P81799.4 NAGK_RAT RecName: Full=N-acetyl-D-glucosamine kinase; Short=N-                                                                                                                              | gi 83642834       | 37  | 14 | 17 | 6  | 11 | 3  |







|      |                                                                                                                                                                                                                                                                   |     |    |    |    |    |    |
|------|-------------------------------------------------------------------------------------------------------------------------------------------------------------------------------------------------------------------------------------------------------------------|-----|----|----|----|----|----|
| 995  | dynactin 3 [Rattus norvegicus], gi 149045686 gb EDL98686.1  rCG55152, isoform CRA_a [Rattus norvegicus]                                                                                                                                                           | 21  | 26 | 2  | 0  | 1  | 25 |
| 996  | PREDICTED: similar to rap2 interacting protein x [Rattus norvegicus]                                                                                                                                                                                              | 74  | 13 | 6  | 10 | 12 | 1  |
| 997  | valosin-containing protein (p97)/p47 complex-interacting protein p135 [Rattus norvegicus], gi 55977741 sp Q8CF97.2 VCIPI1_RAT RecName: Full=Deubiquitinating protein VCIPI135; AltName: Full=Valosin-containing protein p97/p47 complex-interacting protein p135; | 135 | 23 | 0  | 6  | 6  | 17 |
| 998  | PREDICTED: similar to breakpoint cluster region isoform 1 [Rattus norvegicus]                                                                                                                                                                                     | 135 | 15 | 5  | 7  | 9  | 6  |
| 999  | endoplasmic reticulum protein 29 [Rattus norvegicus], gi 2507015 sp P52555.2 ERP29_RAT RecName: Full=Endoplasmic reticulum protein ERp29; AltName: Full=Erp31; Flags: Precursor, gi 1772594 emb CAA11313.1  Erp29 precursor [Rattus norvegicus], gi 2317800 gb    | 29  | 26 | 3  | 0  | 1  | 25 |
| 1000 | RecName: Full=40S ribosomal protein S17, gi 37231603 gb AAH58484.1  Ribosomal protein S17 [Rattus norvegicus], gi 149057361 gb EDM08684.1  rCG24688, isoform CRA_d [Rattus norvegicus]                                                                            | 16  | 31 | 0  | 0  | 0  | 31 |
| 1001 | enabled homolog [Rattus norvegicus], gi 53733843 gb AAH83927.1  Enabled homolog (Drosophila) [Rattus norvegicus]                                                                                                                                                  | 59  | 30 | 0  | 0  | 0  | 30 |
| 1002 | RecName: Full=Mitogen-activated protein kinase 3; AltName: Full=Extracellular signal-regulated kinase 1; Short=ERK-1; AltName: Full=Insulin-stimulated MAP2 kinase; AltName: Full=MAP kinase 1; Short=MAPK 1; AltName: Full=p44-ERK1; AltName: Full=ERT2; AltName | 43  | 18 | 5  | 3  | 5  | 13 |
| 1003 | S-adenosylhomocysteine hydrolase-like 1 [Rattus norvegicus], gi 149025642 gb EDL81885.1  S-adenosylhomocysteine hydrolase-like 1 (predicted) [Rattus norvegicus]                                                                                                  | 53  | 19 | 3  | 3  | 4  | 15 |
| 1004 | RecName: Full=AP-3 complex subunit mu-1; AltName: Full=Adapter-related protein complex 3 mu-1 subunit; AltName: Full=AP-3 adapter complex mu3A subunit; AltName: Full=Mu-adaptin 3A; AltName: Full=Mu3A-adaptin; AltName: Full=Golgi adaptor AP-1 47 kDa protei   | 47  | 26 | 1  | 3  | 3  | 23 |
| 1005 | 3'(2'), 5'-bisphosphate nucleotidase 1 [Rattus norvegicus], gi 46395575 sp Q9Z1N4.1 BPNT1_RAT RecName: Full=3'(2'), 5'-bisphosphate nucleotidase 1; AltName: Full=Bisphosphate 3'-nucleotidase 1; AltName: Full=PAP-inositol-1, 4-phosphatase; Short=PIP; AltName | 33  | 15 | 14 | 0  | 4  | 11 |
| 1006 | polymerase (DNA directed), delta 1, catalytic subunit, isoform CRA_b [Rattus norvegicus]                                                                                                                                                                          | 123 | 15 | 12 | 2  | 6  | 9  |
| 1007 | AKT1 kinase [Rattus norvegicus], gi 1346401 sp P47196.1 AKT1_RAT RecName: Full=RAC-alpha serine/threonine-protein kinase; AltName: Full=RAC-PK-alpha; AltName: Full=Protein kinase B; Short=PKB; gi 485403 dbj BAA06279.1  RAC protein kinase alpha [Rattus nor   | 56  | 12 | 9  | 5  | 8  | 4  |
| 1008 | rCG22154, isoform CRA_a [Rattus norvegicus]                                                                                                                                                                                                                       | 115 | 13 | 10 | 3  | 6  | 7  |
| 1009 | peptidylprolyl isomerase B [Rattus norvegicus], gi 3288923 gb AAC25590.1  cyclophilin B [Rattus norvegicus]                                                                                                                                                       | 23  | 22 | 2  | 0  | 1  | 21 |
| 1010 | Vac14 homolog (S. cerevisiae), isoform CRA_a [Rattus norvegicus]                                                                                                                                                                                                  | 87  | 24 | 1  | 0  | 0  | 24 |
| 1011 | rCG51513 [Rattus norvegicus]                                                                                                                                                                                                                                      | 43  | 21 | 9  | 0  | 3  | 18 |
| 1012 | Chain A, Crystal Structure Of A Mu-Like Calpain, gi 42543460 pdb 1QXPIB Chain B, Crystal Structure Of A Mu-Like Calpain                                                                                                                                           | 103 | 16 | 8  | 1  | 4  | 12 |
| 1013 | PREDICTED: similar to nischarin [Rattus norvegicus], gi 109503762 ref XP_001058707.1  PREDICTED: similar to nischarin [Rattus norvegicus], gi 205829312 sp Q4G017.2 NISCH_RAT RecName: Full=Nischarin; AltName: Full=Imidazoline receptor 1; Short=IR1; Short=I   | 167 | 11 | 15 | 0  | 5  | 6  |
| 1014 | rCG23277 [Rattus norvegicus]                                                                                                                                                                                                                                      | 385 | 15 | 8  | 4  | 7  | 8  |
| 1015 | chromobox homolog 3 [Homo sapiens], gi 20544151 ref NP_057671.2  chromobox homolog 3 [Homo sapiens], gi 56799436 ref NP_001008314.2  chromobox homolog 3 [Rattus norvegicus], gi 108860695 ref NP_031650.3  chromobox homolog 3 [Mus musculus], gi 155372117      | 21  | 21 | 11 | 0  | 3  | 18 |
| 1016 | hippocalcin-like 1 [Mus musculus], gi 8393864 ref NP_059052.1  hippocalcin-like 1 [Rattus norvegicus], gi 51317363 sp P62749.2 HPCL1_RAT RecName: Full=Hippocalcin-like protein 1; AltName: Full=Visinin-like protein 3; Short=VILIP-3; AltName: Full=Neural vi   | 22  | 27 | 0  | 0  | 0  | 27 |
| 1017 | thioredoxin-related transmembrane protein 2 [Rattus norvegicus], gi 81883793 sp Q5XIK2.1 TXD14_RAT RecName: Full=Thioredoxin domain-containing protein 14; AltName: Full=Thioredoxin-related transmembrane protein 2; Flags: Precursor, gi 53733483 gb AAH83678   | 34  | 28 | 0  | 0  | 0  | 28 |
| 1018 | grp75 [Rattus sp.]                                                                                                                                                                                                                                                | 74  | 27 | 0  | 0  | 0  | 27 |
| 1019 | rCG42519, isoform CRA_a [Rattus norvegicus]                                                                                                                                                                                                                       | 52  | 27 | 0  | 0  | 0  | 27 |
| 1020 | RecName: Full=Alpha-2-HS-glycoprotein; AltName: Full=Fetuin-A; AltName: Full=Glycoprotein PP63; AltName: Full=59 kDa bone sialic acid-containing protein; Short=BSP; Flags: Precursor, gi 56140 emb CAA45042.1  fetuin precursor [Rattus norvegicus], gi 220676   | 38  | 1  | 26 | 0  | 8  | 0  |
| 1021 | X-linked eukaryotic translation initiation factor 1A [Homo sapiens], gi 31541824 ref NP_079713.2  eukaryotic translation initiation factor 1A, Y-linked [Mus musculus], gi 52345532 ref NP_001004814.1  intracisternal A particle-promoted polypeptide [Xenopus   | 16  | 19 | 0  | 0  | 0  | 19 |
| 1022 | Sjogren syndrome antigen B, isoform CRA_b [Rattus norvegicus], gi 149022179 gb EDL79073.1  Sjogren syndrome antigen B, isoform CRA_b [Rattus norvegicus]                                                                                                          | 46  | 18 | 8  | 2  | 5  | 13 |
| 1023 | Down syndrome critical region homolog 2 (human) (predicted), isoform CRA_b [Rattus norvegicus]                                                                                                                                                                    | 33  | 19 | 8  | 1  | 4  | 15 |
| 1024 | adenylosuccinate synthase [Rattus norvegicus], gi 149040836 gb EDL94793.1  adenylosuccinate synthetase, non muscle (predicted) [Rattus norvegicus]                                                                                                                | 50  | 17 | 6  | 6  | 8  | 9  |
| 1025 | putative MAGE-like protein [Rattus norvegicus]                                                                                                                                                                                                                    | 66  | 12 | 12 | 6  | 10 | 2  |
| 1026 | paralemmin, isoform CRA_b [Rattus norvegicus]                                                                                                                                                                                                                     | 37  | 21 | 1  | 6  | 6  | 15 |
| 1027 | proteasome inhibitor subunit 1 [Rattus norvegicus], gi 62510947 sp Q5XIU5.1 PSMF1_RAT RecName: Full=Proteasome inhibitor P131 subunit, gi 53734363 gb AAH83575.1  Similar to Proteasome inhibitor P131 subunit [Rattus norvegicus], gi 149031071 gb EDL86098.1    | 30  | 12 | 4  | 8  | 9  | 3  |
| 1028 | p21 (CDKN1A)-activated kinase 1 [Rattus norvegicus], gi 3915789 sp P35455.3 PAK1_RAT RecName: Full=Serine/threonine-protein kinase PAK 1; AltName: Full=p21-activated kinase 1; Short=PAK-1; AltName: Full=p68-PAK; AltName: Full=Alpha-PAK; AltName: Full=Prot   | 61  | 22 | 2  | 0  | 1  | 21 |
| 1029 | PREDICTED: similar to EH domain binding protein 1 [Rattus norvegicus]                                                                                                                                                                                             | 190 | 15 | 7  | 0  | 2  | 13 |
| 1030 | cytochrome c oxidase subunit II [Rattus norvegicus], gi 117043 sp P00406.2 COX2_RAT RecName: Full=Cytochrome c oxidase subunit 2; AltName: Full=Cytochrome c oxidase polypeptide II, gi 13481 emb CAA32957.1  cytochrome-c oxidase II [Rattus norvegicus], gi 1   | 26  | 21 | 1  | 7  | 7  | 14 |
| 1031 | PREDICTED: heterogeneous nuclear ribonucleoprotein A1 [Equus caballus], gi 74222222 dbj BAE26919.1  unnamed protein product [Mus musculus], gi 149031878 gb EDL86790.1  rCG50547, isoform CRA_b [Rattus norvegicus], gi 149031880 gb EDL86792.1  rCG50547, isof   | 39  | 15 | 3  | 6  | 7  | 8  |
| 1032 | exosome component 2 [Rattus norvegicus], gi 149039049 gb EDL93269.1  exosome component 2 (predicted) [Rattus norvegicus]                                                                                                                                          | 33  | 23 | 2  | 2  | 3  | 20 |
| 1033 | initiation factor eIF-2B gamma subunit                                                                                                                                                                                                                            | 50  | 20 | 0  | 3  | 3  | 17 |
| 1034 | Cdc42 binding protein kinase beta, isoform CRA_a [Rattus norvegicus]                                                                                                                                                                                              | 192 | 19 | 0  | 2  | 2  | 17 |
| 1035 | PREDICTED: similar to alveolar soft part sarcoma chromosome region, candidate 1 long isoform isoform 5 [Rattus norvegicus]                                                                                                                                        | 60  | 24 | 0  | 4  | 4  | 20 |
| 1036 | programmed cell death 6 [Rattus norvegicus], gi 149032826 gb EDL87681.1  programmed cell death 6 (predicted), isoform CRA_a [Rattus norvegicus]                                                                                                                   | 22  | 10 | 14 | 0  | 4  | 6  |
| 1037 | G protein-coupled receptor kinase interacting ArfGAP 1 [Rattus norvegicus], gi 18203659 sp Q9Z272.1 GIT1_RAT RecName: Full=ARF GTPase-activating protein GIT1; AltName: Full=G protein-coupled receptor kinase-interactor 1; AltName: Full=GRK-interacting prot   | 85  | 15 | 1  | 4  | 4  | 11 |
| 1038 | laminin, beta 1 [Rattus norvegicus], gi 149051074 gb EDM03247.1  laminin, beta 1 (predicted) [Rattus norvegicus]                                                                                                                                                  | 112 | 21 | 0  | 1  | 1  | 20 |
| 1039 | mitogen-activated protein kinase kinase 4 [Mus musculus], gi 71795640 ref NP_001025194.1  mitogen activated protein kinase kinase 4 [Rattus norvegicus], gi 2507202 sp P47809.2 IMP2K4_MOUSE RecName: Full=Dual specificity mitogen-activated protein kinase kin  | 44  | 12 | 4  | 9  | 10 | 2  |
| 1040 | PREDICTED: similar to SH3-domain GRB2-like 2 [Rattus norvegicus], gi 109476698 ref XP_001070855.1  PREDICTED: similar to SH3-domain GRB2-like 2 [Rattus norvegicus]                                                                                               | 52  | 23 | 5  | 0  | 2  | 21 |
| 1041 | polymerase (RNA) II (DNA directed) polypeptide E [Mus musculus], gi 157819761 ref NP_001103084.1  polymerase (RNA) II (DNA directed) polypeptide E, 25kDa [Rattus norvegicus], gi 109481606 ref XP_001076884.1  PREDICTED: similar to DNA-directed RNA polymera   | 25  | 24 | 3  | 2  | 3  | 21 |
| 1042 | Na+/K+-ATPase beta 1 subunit [Rattus norvegicus], gi 114395 sp P07340.1 AT1B1_RAT RecName: Full=Sodium/potassium-transporting ATPase subunit beta-1; AltName: Full=Sodium/potassium-dependent ATPase subunit beta-1, gi 2033041 gb AAA40781.1  Na-, K-ATPase b    | 35  | 27 | 0  | 2  | 2  | 25 |
| 1043 | PREDICTED: similar to SH2 domain binding protein 1 (tetrairicopeptide repeat containing) [Rattus norvegicus], gi 109462689 ref XP_001077817.1  PREDICTED: similar to SH2 domain binding protein 1 (tetrairicopeptide repeat containing) [Rattus norvegicus]       | 144 | 13 | 0  | 8  | 8  | 5  |
| 1044 | TPA: proteasome subunit alpha type 3-like [Rattus norvegicus]                                                                                                                                                                                                     | 28  | 25 | 2  | 0  | 1  | 24 |
| 1045 | rCG23030, isoform CRA_c [Rattus norvegicus]                                                                                                                                                                                                                       | 18  | 18 | 0  | 10 | 10 | 8  |
| 1046 | rCG24640, isoform CRA_a [Rattus norvegicus]                                                                                                                                                                                                                       | 26  | 20 | 4  | 0  | 1  | 19 |
| 1047 | RecName: Full=Carboxypeptidase E; Short=CPE; AltName: Full=Carboxypeptidase H; Short=CPH; AltName: Full=Enkephalin convertase; AltName: Full=Prohormone-processing carboxypeptidase; Flags: Precursor, gi 203304 gb AAA40875.1  carboxypeptidase H precursor (E   | 53  | 26 | 0  | 0  | 0  | 26 |
| 1048 | frequenin homolog (Drosophila), isoform CRA_a [Rattus norvegicus], gi 149039058 gb EDL93278.1  frequenin homolog (Drosophila), isoform CRA_a [Rattus norvegicus]                                                                                                  | 21  | 28 | 0  | 0  | 0  | 28 |
| 1049 | LanC-like 1 [Rattus norvegicus], gi 47115529 sp Q9QX69.2 LANC1_RAT RecName: Full=LanC-like protein 1; AltName: Full=40 kDa erythrocyte membrane protein; AltName: Full=p40, gi 6625487 emb CAB63943.1  lantionine synthetase C-like protein 1 [Rattus norveg      | 45  | 15 | 0  | 4  | 4  | 11 |
| 1050 | PREDICTED: similar to Coronin-7 (70 kDa WD repeat tumor rejection antigen homolog) [Rattus norvegicus]                                                                                                                                                            | 106 | 17 | 1  | 5  | 5  | 12 |
| 1051 | vacuolar ATPase subunit H, isoform CRA_a [Rattus norvegicus]                                                                                                                                                                                                      | 56  | 20 | 1  | 1  | 1  | 19 |
| 1052 | DNA directed RNA polymerase II polypeptide B [Homo sapiens], gi 157822127 ref NP_001099472.1  DNA directed RNA polymerase II polypeptide B [Rattus norvegicus], gi 114594586 ref XP_517275.2  PREDICTED: DNA directed RNA polymerase II polypeptide B isoform 2   | 134 | 16 | 6  | 3  | 5  | 11 |
| 1053 | Epsin 1 [Rattus norvegicus], gi 41016934 sp O88339.1 EPN1_RAT RecName: Full=Epsin-1; AltName: Full=EPS-15-interacting protein 1, gi 3249559 gb AAC33823.1  EH domain binding protein Epsin [Rattus norvegicus], gi 149016701 gb EDL75887.1  Epsin 1 [Rattus nor   | 60  | 16 | 11 | 1  | 4  | 12 |
| 1054 | putative breast adenocarcinoma marker [Mus musculus], gi 157821085 ref NP_001102376.1  chromatin modifying protein 2A [Rattus norvegicus], gi 73917741 sp Q9DB34.1 CHM2A_MOUSE RecName: Full=Charged multivesicular body protein 2a; AltName: Full=Chromatin-mo   | 25  | 12 | 5  | 2  | 4  | 8  |









|      |                                                                                                                                                                                                                                                                  |                   |     |    |    |   |   |    |
|------|------------------------------------------------------------------------------------------------------------------------------------------------------------------------------------------------------------------------------------------------------------------|-------------------|-----|----|----|---|---|----|
| 1283 | hypothetical protein LOC292139 [Rattus norvegicus], gi 156637367 sp A0MZ67.1 SHOT1_RAT RecName: Full=Shootin-1, gi 117667954 gb ABK56023.1  shootin2 [Rattus norvegicus], gi 149040514 gb EDL94552.1  similar to 4930506M07Rik protein (predicted), isoform CRA  | gi 119508806      | 71  | 14 | 0  | 0 | 0 | 14 |
| 1284 | hypothetical protein LOC289400 [Rattus norvegicus], gi 149058504 gb EDM09661.1  similar to KIAA1078 protein (predicted) [Rattus norvegicus]                                                                                                                      | gi 197386168      | 166 | 4  | 5  | 3 | 5 | 0  |
| 1285 | hypothetical protein LOC308568 [Rattus norvegicus], gi 38014715 gb AAH60592.1  Similar to RIKEN cDNA 2410002F23 [Rattus norvegicus]                                                                                                                              | gi 62078767       | 28  | 16 | 0  | 5 | 5 | 11 |
| 1286 | ribophorin II, isoform CRA_a [Rattus norvegicus]                                                                                                                                                                                                                 | gi 149043116 (+1) | 65  | 19 | 0  | 0 | 0 | 19 |
| 1287 | syntaxin 6 [Rattus norvegicus], gi 2501094 sp Q63635.1 STX6_RAT RecName: Full=Syntaxin-6, gi 1488683 gb AAC52709.1  syntaxin 6, gi 51858907 gb AAH81769.1  Syntaxin 6 [Rattus norvegicus]                                                                        | gi 13928922       | 29  | 16 | 0  | 4 | 4 | 12 |
| 1288 | malic enzyme 1 [Rattus norvegicus]                                                                                                                                                                                                                               | gi 149018984 (+2) | 55  | 18 | 0  | 0 | 0 | 18 |
| 1289 | PREDICTED: similar to TATA-binding protein-associated factor 172 (ATP-dependent helicase BTAF1) (TBP-associated factor 172) (TAF-172) (TAF(II)170) (B-TFIID transcription factor-associated 170 kDa subunit) [Rattus norvegicus], gi 109463837 ref XP_001080159  | gi 109460086      | 207 | 4  | 15 | 0 | 5 | 0  |
| 1290 | cell adhesion molecule 4 [Rattus norvegicus], gi 123778954 sp Q1W1M1.1 CADM4_RAT RecName: Full=Cell adhesion molecule 4; AltName: Full=Immunoglobulin superfamily member 4C; AltName: Full=Nectin-like protein 4; Flags: Precursor, gi 82619338 gb ABB85364.1    | gi 114052915      | 43  | 19 | 0  | 0 | 0 | 19 |
| 1291 | MOB1, Mps One Binder kinase activator-like 2A [Rattus norvegicus], gi 149034510 gb EDL89247.1  MOB1, Mps One Binder kinase activator-like 2B (yeast) (predicted), isoform CRA_a [Rattus norvegicus], gi 149034512 gb EDL89249.1  MOB1, Mps One Binder kinase ac  | gi 157823747      | 26  | 11 | 1  | 0 | 0 | 11 |
| 1292 | histone deacetylase 2 [Rattus norvegicus], gi 149032950 gb EDL87791.1  histone deacetylase 2 [Rattus norvegicus]                                                                                                                                                 | gi 208022663      | 55  | 12 | 0  | 7 | 7 | 5  |
| 1293 | FERM, RhoGEF (Arhgef) and pleckstrin domain protein 1 (chondrocyte-derived) [Rattus norvegicus], gi 149050235 gb EDM02559.1  FERM, RhoGEF (Arhgef) and pleckstrin domain protein 1 (chondrocyte-derived) (predicted) [Rattus norvegicus]                         | gi 157822917      | 119 | 9  | 0  | 3 | 3 | 6  |
| 1294 | Ras homolog enriched in brain [Rattus norvegicus], gi 57097443 ref XP_532768.1  PREDICTED: similar to GTP-binding protein Rheb (Ras homolog enriched in brain) [Canis familiaris], gi 194666609 ref XP_001787150.1  PREDICTED: hypothetical protein [Bos taurus] | gi 6981476        | 20  | 15 | 2  | 0 | 1 | 14 |
| 1295 | PRA1 domain family, member 2 [Rattus norvegicus], gi 149028448 gb EDL83833.1  PRA1 domain family 2 (predicted) [Rattus norvegicus]                                                                                                                               | gi 157823972      | 19  | 17 | 0  | 0 | 0 | 17 |
| 1296 | ubiquitin-conjugating enzyme E2N [Rattus norvegicus], gi 77417616 sp Q9QX9.1 UEE2N_RAT RecName: Full=Ubiquitin-conjugating enzyme E2 N; AltName: Full=Ubiquitin-protein ligase N; AltName: Full=Ubiquitin carrier protein N; AltName: Full=Bendless-like ubiq    | gi 16758810       | 17  | 8  | 6  | 0 | 2 | 6  |
| 1297 | RecName: Full=G-protein coupled receptor 56; Flags: Precursor, gi 22255986 gb AAM94855.1  G protein-coupled receptor 56 [Rattus norvegicus]                                                                                                                      | gi 45476764       | 77  | 20 | 0  | 0 | 0 | 20 |
| 1298 | isocitrate dehydrogenase 3 (NAD+) alpha, isoform CRA_a [Rattus norvegicus]                                                                                                                                                                                       | gi 149041699 (+4) | 41  | 19 | 0  | 0 | 0 | 19 |
| 1299 | BTB (POZ) domain containing 17 [Rattus norvegicus], gi 149054729 gb EDM06546.1  similar to CG1841-PA, isoform A (predicted), isoform CRA_b [Rattus norvegicus]                                                                                                   | gi 197385182      | 55  | 4  | 0  | 4 | 4 | 0  |
| 1300 | saccharopine dehydrogenase (putative) [Rattus norvegicus], gi 73919297 sp Q6AY30.1 SCPDH_RAT RecName: Full=Probable saccharopine dehydrogenase, gi 50925783 gb AAH79215.1  Saccharopine dehydrogenase (putative) [Rattus norvegicus], gi 149040855 gb EDL94812.  | gi 62078699       | 47  | 20 | 0  | 0 | 0 | 20 |
| 1301 | 5'-AMP-activated protein kinase, gamma-1 subunit                                                                                                                                                                                                                 | gi 1335860 (+2)   | 37  | 12 | 4  | 1 | 2 | 10 |
| 1302 | rCG47917, isoform CRA_b [Rattus norvegicus]                                                                                                                                                                                                                      | gi 149062107 (+1) | 82  | 12 | 4  | 2 | 3 | 9  |
| 1303 | dihydroxyacetone kinase 2 homolog [Rattus norvegicus], gi 85718638 sp Q4KLZ6.1 DHAK_RAT RecName: Full=Bifunctional ATP-dependent dihydroxyacetone kinase/FAD-AMP lyase (cyclizing); Includes: RecName: Full=ATP-dependent dihydroxyacetone kinase; Short=DHA ki  | gi 84781664       | 59  | 13 | 5  | 0 | 2 | 11 |
| 1304 | cofactor of BRCA1 [Rattus norvegicus], gi 149039415 gb EDL93635.1  similar to cofactor of BRCA1; negative elongation factor protein B (predicted), isoform CRA_b [Rattus norvegicus]                                                                             | gi 165377254      | 66  | 13 | 1  | 3 | 3 | 10 |
| 1305 | vacuolar protein sorting 37 homolog B [Rattus norvegicus], gi 149063285 gb EDM13608.1  vacuolar protein sorting 37B (yeast) (predicted), isoform CRA_b [Rattus norvegicus]                                                                                       | gi 157786918      | 31  | 15 | 2  | 3 | 4 | 11 |
| 1306 | RAB, member of RAS oncogene family-like 4 [Rattus norvegicus], gi 149066017 gb EDM15890.1  RAB, member of RAS oncogene family-like 4 (predicted) [Rattus norvegicus], gi 195539923 gb AAI68150.1  Rab14 protein [Rattus norvegicus]                              | gi 194473634      | 21  | 12 | 4  | 0 | 1 | 11 |
| 1307 | similar to KIAA2010 protein (predicted), isoform CRA_b [Rattus norvegicus]                                                                                                                                                                                       | gi 149025363      | 94  | 8  | 8  | 3 | 6 | 2  |
| 1308 | ribosomal protein L5 [Rattus norvegicus], gi 1173056 sp P09895.3 RLS5_RAT RecName: Full=60S ribosomal protein L5, gi 57125 emb CAA29506.1  unnamed protein product [Rattus norvegicus], gi 38014831 gb AAH60561.1  Ribosomal protein L5 [Rattus norvegicus], gi  | gi 13592051 (+1)  | 34  | 10 | 3  | 6 | 7 | 3  |
| 1309 | NOL1/NOP2/Sun domain family, member 2 [Rattus norvegicus], gi 149032756 gb EDL87611.1  NOL1/NOP2/Sun domain family, member 2 (predicted) [Rattus norvegicus]                                                                                                     | gi 157822221      | 88  | 7  | 4  | 4 | 5 | 2  |
| 1310 | ribophorin I, isoform CRA_a [Rattus norvegicus]                                                                                                                                                                                                                  | gi 149036687 (+2) | 68  | 16 | 0  | 1 | 1 | 15 |
| 1311 | guanine nucleotide binding protein (G protein), beta polypeptide 4 [Rattus norvegicus], gi 62906844 sp O35353.4 GBB4_RAT RecName: Full=Guanine nucleotide-binding protein subunit beta-4; AltName: Full=Transducin beta chain 4, gi 45359810 gb AAS59142.1  G-p  | gi 62078551       | 37  | 14 | 0  | 5 | 5 | 9  |
| 1312 | stromal cell derived factor receptor 1, isoform CRA_a [Rattus norvegicus]                                                                                                                                                                                        | gi 149041842 (+4) | 44  | 14 | 0  | 1 | 1 | 13 |
| 1313 | target of myb1-like 2 (chicken) (predicted), isoform CRA_b [Rattus norvegicus], gi 149052820 gb EDM04637.1  target of myb1-like 2 (chicken) (predicted), isoform CRA_b [Rattus norvegicus]                                                                       | gi 149052819 (+1) | 31  | 11 | 4  | 3 | 4 | 7  |
| 1314 | podocalyxin-like 2 [Rattus norvegicus], gi 149036702 gb EDL91320.1  podocalyxin-like 2 (predicted) [Rattus norvegicus], gi 171847413 gb AAI61970.1  Podocalyxin-like 2 [Rattus norvegicus]                                                                       | gi 157819739      | 65  | 16 | 1  | 1 | 1 | 15 |
| 1315 | heterogeneous nuclear ribonucleoprotein A/B [Rattus norvegicus], gi 6911221 gb AAF31437.1 AF216753.1 CarG-binding factor A [Rattus norvegicus], gi 6562847 emb CAB62554.1  heterogeneous nuclear ribonucleoprotein; type A/B hnRNP p38 [Rattus norvegicus], gi   | gi 140971918 (+3) | 31  | 9  | 10 | 0 | 3 | 6  |
| 1316 | PREDICTED: similar to calmodulin regulated spectrin-associated protein 1 [Rattus norvegicus], gi 109469613 ref XP_001078134.1  PREDICTED: similar to calmodulin regulated spectrin-associated protein 1 [Rattus norvegicus]                                      | gi 109467903      | 179 | 2  | 8  | 2 | 5 | 0  |
| 1317 | down-regulator of transcription 1 [Rattus norvegicus], gi 62900752 sp Q5XI68.1 NC2B_RAT RecName: Full=Protein Dr1; AltName: Full=Down-regulator of transcription 1; AltName: Full=TATA-binding protein-associated phosphoprotein; AltName: Full=Negative cofact  | gi 58865406       | 19  | 9  | 6  | 0 | 2 | 7  |
| 1318 | acyl-Coenzyme A binding domain containing 6 [Rattus norvegicus], gi 81889940 sp Q5RJX8.1 ACBDB6_RAT RecName: Full=Acyl-CoA-binding domain-containing protein 6, gi 55778318 gb AAH86598.1  Acyl-Coenzyme A binding domain containing 6 [Rattus norvegicus], gi 1 | gi 58865390       | 31  | 11 | 3  | 2 | 3 | 8  |
| 1319 | protein tyrosine phosphatase 4a1 [Rattus norvegicus]                                                                                                                                                                                                             | gi 17528929 (+3)  | 20  | 16 | 3  | 0 | 1 | 15 |
| 1320 | La ribonucleoprotein domain family, member 7 [Rattus norvegicus], gi 53733605 gb AAH83898.1  La ribonucleoprotein domain family, member 7 [Rattus norvegicus]                                                                                                    | gi 112983842 (+1) | 56  | 19 | 0  | 0 | 0 | 19 |
| 1321 | eukaryotic translation termination factor 1 [Homo sapiens], gi 56605766 ref NP_001008345.1  eukaryotic translation termination factor 1 [Rattus norvegicus], gi 115495753 ref NP_001069722.1  eukaryotic translation termination factor 1 [Bos taurus], gi 1242  | gi 4759034 (+1)   | 49  | 11 | 5  | 0 | 2 | 9  |
| 1322 | deleted in colorectal carcinoma, isoform CRA_b [Rattus norvegicus]                                                                                                                                                                                               | gi 149064590 (+1) | 150 | 14 | 4  | 0 | 1 | 13 |
| 1323 | AKT interacting protein [Rattus norvegicus], gi 58476597 gb AAH89985.1  Fused toes [Rattus norvegicus], gi 149032679 gb EDL87549.1  rCG44356, isoform CRA_b [Rattus norvegicus], gi 149032680 gb EDL87550.1  rCG44356, isoform CRA_b [Rattus norvegicus]         | gi 58865430       | 33  | 6  | 0  | 3 | 3 | 3  |
| 1324 | breast carcinoma amplified sequence 2 (predicted), isoform CRA_c [Rattus norvegicus]                                                                                                                                                                             | gi 149030454 (+1) | 24  | 16 | 0  | 4 | 4 | 12 |
| 1325 | YKT6 v-SNARE homolog [Rattus norvegicus], gi 81870672 sp Q5EGY4.1 YKT6_RAT RecName: Full=Synaptobrevin homolog YKT6, gi 58758764 gb AAW81771.1  SNARE protein Ykt6 [Rattus norvegicus], gi 149047657 gb EDM00327.1  rCG35885, isoform CRA_a [Rattus norvegicus]  | gi 162138924      | 22  | 12 | 6  | 0 | 2 | 10 |
| 1326 | ubiquitin specific protease 10 [Rattus norvegicus]                                                                                                                                                                                                               | gi 149038330 (+1) | 87  | 9  | 0  | 3 | 3 | 6  |
| 1327 | serine/threonine kinase 25 [Rattus norvegicus], gi 89337277 ref NP_067512.3  serine/threonine kinase 25 [Mus musculus], gi 33943091 gb AAQ55284.1  serine/threonine kinase 25 [Rattus norvegicus], gi 47937402 gb AAH71218.1  Serine/threonine kinase 25 (yeast  | gi 34576555       | 48  | 12 | 0  | 5 | 5 | 7  |
| 1328 | transmembrane emp24 protein transport domain containing 9 [Rattus norvegicus], gi 56970465 gb AAH88422.1  Transmembrane emp24 protein transport domain containing 9 [Rattus norvegicus], gi 149039848 gb EDL93964.1  transmembrane emp24 protein transport dom   | gi 57528337       | 27  | 17 | 2  | 0 | 1 | 16 |
| 1329 | strawberry notch homolog 1 [Rattus norvegicus], gi 149063266 gb EDM13589.1  sno, strawberry notch homolog 1 (Drosophila), isoform CRA_a [Rattus norvegicus]                                                                                                      | gi 157821077      | 137 | 2  | 11 | 2 | 5 | 0  |
| 1330 | ribosomal protein L10a [Rattus norvegicus], gi 15431288 ref NP_009035.3  ribosomal protein L10a [Homo sapiens], gi 62751847 ref NP_001015647.1  ribosomal protein L10a [Bos taurus], gi 73972648 ref XP_863955.1  PREDICTED: similar to ribosomal protein L10a   | gi 13592009       | 25  | 15 | 0  | 0 | 0 | 15 |
| 1331 | RecName: Full=Prothrombin; AltName: Full=Coagulation factor II; Contains: RecName: Full=Activation peptide fragment 1; Contains: RecName: Full=Activation peptide fragment 2; Contains: RecName: Full=Thrombin light chain; Contains: RecName: Full=Thrombin he  | gi 135809 (+1)    | 70  | 2  | 15 | 0 | 5 | 0  |
| 1332 | resistance to inhibitors of cholinesterase 8 homolog A [Rattus norvegicus], gi 149061518 gb EDM11941.1  resistance to inhibitors of cholinesterase 8 homolog A (C. elegans) [Rattus norvegicus], gi 169642109 gb AAI60852.1  Ric8a protein [Rattus norvegicus]   | gi 198278525      | 60  | 6  | 4  | 6 | 7 | 0  |
| 1333 | gelsolin, isoform CRA_a [Rattus norvegicus]                                                                                                                                                                                                                      | gi 149038928 (+2) | 86  | 2  | 13 | 0 | 4 | 0  |
| 1334 | cortactin, isoform CRA_c [Rattus norvegicus]                                                                                                                                                                                                                     | gi 149061813      | 61  | 16 | 1  | 0 | 0 | 16 |
| 1335 | protein kinase, interferon inducible double stranded RNA dependent activator, isoform CRA_b [Rattus norvegicus]                                                                                                                                                  | gi 149022336 (+1) | 34  | 10 | 0  | 6 | 6 | 4  |
| 1336 | protein kinase C, iota [Rattus norvegicus]                                                                                                                                                                                                                       | gi 149048611      | 56  | 7  | 0  | 4 | 4 | 3  |
| 1337 | CTNBP2 N-terminal like [Rattus norvegicus], gi 149030408 gb EDL85445.1  CTNBP2 N-terminal like (predicted), isoform CRA_a [Rattus norvegicus]                                                                                                                    | gi 164555360      | 70  | 16 | 0  | 0 | 0 | 16 |
| 1338 | unnamed protein product [Rattus norvegicus]                                                                                                                                                                                                                      | gi 55628          | 69  | 5  | 11 | 0 | 3 | 2  |
| 1339 | PREDICTED: similar to CG8379-PA, isoform A [Rattus norvegicus], gi 109463946 ref XP_001058595.1  PREDICTED: similar to CG8379-PA, isoform A [Rattus                                                                                                              | gi 109460219      | 79  | 13 | 0  | 2 | 2 | 11 |













|      |                                                                                                                                                                                                                                                                    |                     |     |    |    |   |   |    |
|------|--------------------------------------------------------------------------------------------------------------------------------------------------------------------------------------------------------------------------------------------------------------------|---------------------|-----|----|----|---|---|----|
| 1636 | LOC498793 protein [Rattus norvegicus]                                                                                                                                                                                                                              | gi 72679950         | 63  | 6  | 5  | 0 | 2 | 4  |
| 1637 | similar to RIKEN cDNA 0710008K08 (predicted), isoform CRA_a [Rattus norvegicus]                                                                                                                                                                                    | gi 149057580 (+1)   | 39  | 5  | 4  | 0 | 1 | 4  |
| 1638 | rCG22366, isoform CRA_a [Rattus norvegicus]                                                                                                                                                                                                                        | gi 149046039 (+2)   | 52  | 6  | 0  | 3 | 3 | 3  |
| 1639 | BRCA2 and CDKN1A interacting protein (predicted), isoform CRA_b [Rattus norvegicus]                                                                                                                                                                                | gi 149061343        | 36  | 9  | 2  | 0 | 1 | 8  |
| 1640 | PREDICTED: similar to jumonji domain containing 1B [Rattus norvegicus], gi 149017194 gb EDL76245.1  rCG49501 [Rattus norvegicus]                                                                                                                                   | gi 109507127        | 191 | 2  | 9  | 0 | 3 | 0  |
| 1641 | PREDICTED: similar to Peroxisomal targeting signal 1 receptor (Peroxisome receptor 1) (Peroxisomal C-terminal targeting signal import receptor) (PTS1-BP) (Peroxin-5) (PTS1 receptor) (PXR1P) (PTS1R) [Rattus norvegicus]                                          | gi 109474193 (+2)   | 81  | 5  | 2  | 0 | 1 | 4  |
| 1642 | PREDICTED: similar to tRNA nucleotidyl transferase, CCA-adding, 1 isoform 2 [Rattus norvegicus], gi 109462731 ref XP_001075311.1  PREDICTED: similar to tRNA nucleotidyl transferase, CCA-adding, 1 isoform 3 [Rattus norvegicus]                                  | gi 109462729 (+1)   | 50  | 3  | 5  | 0 | 2 | 1  |
| 1643 | exocyst complex component 5 [Rattus norvegicus], gi 24418658 sp P97878.1 EXOC5_RAT RecName: Full=Exocyst complex component 5; AltName: Full=Exocyst complex component Sec10; AltName: Full=71 kDa component of resc6/8 secretory complex; AltName: Full=p71, gi    | gi 11559976         | 82  | 6  | 0  | 2 | 2 | 4  |
| 1644 | N-myc downstream regulated gene 3 [Rattus norvegicus], gi 81884642 sp Q6AYR2.1 NDRG3_RAT RecName: Full=Protein NDRG3, gi 50926863 gb AAH78946.1  N-myc downstream regulated gene 3 [Rattus norvegicus]                                                             | gi 62078575         | 42  | 6  | 3  | 0 | 1 | 5  |
| 1645 | solute carrier family 1 (glutamate/neutral amino acid transporter), member 4 [Rattus norvegicus], gi 37718695 dbj BAC99093.1  neutral amino acid transporter ASCT1 [Rattus norvegicus], gi 149044752 gb EDL97938.1  solute carrier family 1 (glutamate/neutral     | gi 38454264         | 56  | 6  | 0  | 3 | 3 | 3  |
| 1646 | hypothetical protein LOC362676 [Rattus norvegicus], gi 149024781 gb EDL81278.1  similar to RIKEN cDNA 2810405K02 (predicted) [Rattus norvegicus]                                                                                                                   | gi 157822867        | 22  | 8  | 1  | 0 | 0 | 8  |
| 1647 | rCG39653, isoform CRA_e [Rattus norvegicus]                                                                                                                                                                                                                        | gi 149068166 (+1)   | 15  | 6  | 1  | 0 | 0 | 6  |
| 1648 | survival motor neuron 1 [Rattus norvegicus], gi 3024613 sp O35876.1 SMN_RAT RecName: Full=Survival motor neuron protein, gi 2393771 gb AAB96377.1  survival of motor neuron [Rattus norvegicus]                                                                    | gi 11968084 (+3)    | 31  | 5  | 0  | 3 | 3 | 2  |
| 1649 | neuropilin [Rattus norvegicus]                                                                                                                                                                                                                                     | gi 2407643 (+1)     | 103 | 10 | 0  | 0 | 0 | 10 |
| 1650 | gi 109483673-R                                                                                                                                                                                                                                                     | gi 109483673-R (+1) | ?   | 6  | 1  | 0 | 0 | 6  |
| 1651 | PREDICTED: similar to RIKEN cDNA 1110018J12 [Rattus norvegicus]                                                                                                                                                                                                    | gi 109478862 (+1)   | 94  | 10 | 0  | 0 | 0 | 10 |
| 1652 | PREDICTED: similar to Versican core protein precursor (Large fibroblast proteoglycan) (Chondroitin sulfate proteoglycan core protein 2) (PG-M) [Rattus norvegicus]                                                                                                 | gi 109465804 (+3)   | 367 | 10 | 0  | 0 | 0 | 10 |
| 1653 | RecName: Full=Mitochondrial fission 1 protein; AltName: Full=Fis1 homolog; Short=rFis1; AltName: Full=Tetratricopeptide repeat protein 11; AltName: Full=TPR repeat protein 11, gi 149062977 gb EDM13300.1  fission 1 (mitochondrial outer membrane) homolog (y    | gi 94711371         | 17  | 9  | 2  | 0 | 1 | 8  |
| 1654 | engulfment and cell motility 1 isoform 1 [Mus musculus], gi 157822513 ref NP_001101885.1  engulfment and cell motility 1 [Rattus norvegicus], gi 30913074 sp Q88PU7.2 ELMO1_MOUSE RecName: Full=Engulfment and cell motility protein 1; AltName: Full=CED-12 ho    | gi 17933766 (+1)    | 84  | 4  | 0  | 3 | 3 | 1  |
| 1655 | rCG32197, isoform CRA_a [Rattus norvegicus]                                                                                                                                                                                                                        | gi 149042757        | 15  | 9  | 1  | 0 | 0 | 9  |
| 1656 | N-myc downstream regulated gene 1 [Rattus norvegicus], gi 81884862 sp Q6JE36.1 NDRG1_RAT RecName: Full=Protein NDRG1; AltName: Full=N-myc downstream-regulated gene 1 protein; Short=Protein Ndr1, gi 45861619 gb AAS78638.1  N-myc downstream regulated 1 [Rat    | gi 58865550         | 43  | 10 | 1  | 0 | 0 | 10 |
| 1657 | RWD domain containing 1 [Rattus norvegicus], gi 34098350 sp Q99ND9.1 RWDD1_RAT RecName: Full=RWD domain-containing protein 1; AltName: Full=Small androgen receptor-interacting protein, gi 12331287 emb CAC24710.1  small androgen receptor-interacting protei    | gi 22129753         | 28  | 10 | 2  | 0 | 1 | 9  |
| 1658 | glycolipid transfer protein [Rattus norvegicus], gi 20579849 sp B0BNM9.1 GLTP_RAT RecName: Full=Glycolipid transfer protein; Short=GLTP, gi 149063607 gb EDM13930.1  glycolipid transfer protein (predicted) [Rattus norvegicus], gi 165971328 gb AAI58885.1       | gi 197313643        | 24  | 2  | 10 | 0 | 3 | 0  |
| 1659 | SAPS domain family, member 1 [Rattus norvegicus], gi 149016659 gb EDL75845.1  SAPS domain family, member 1 (predicted) [Rattus norvegicus]                                                                                                                         | gi 209529660        | 95  | 10 | 0  | 0 | 0 | 10 |
| 1660 | uridine-cytidine kinase 2 [Mus musculus], gi 109498991 ref XP_001076056.1  PREDICTED: similar to uridine-cytidine kinase 2 [Rattus norvegicus], gi 20455355 sp Q99PM9.1 UCK2_MOUSE RecName: Full=Uridine-cytidine kinase 2; Short=UCK 2; AltName: Full=Uridine     | gi 13507680 (+1)    | 29  | 7  | 3  | 0 | 1 | 6  |
| 1661 | 107 kDa sialoglycoprotein [Rattus norvegicus]                                                                                                                                                                                                                      | gi 56578            | 42  | 8  | 0  | 0 | 0 | 8  |
| 1662 | PREDICTED: similar to cyclin-dependent kinase 6 [Rattus norvegicus], gi 109473069 ref XP_001068770.1  PREDICTED: similar to cyclin-dependent kinase 6 [Rattus norvegicus], gi 149029083 gb EDL84377.1  cyclin-dependent kinase 6 [Rattus norvegicus]               | gi 62646797         | 37  | 6  | 4  | 0 | 1 | 5  |
| 1663 | hypothetical protein LOC304285 [Rattus norvegicus], gi 123785689 sp Q3ZBA0.1 TCPR1_RAT RecName: Full=Tectonin beta-propeller repeat-containing protein 1, gi 73695308 gb AAI03479.1  Similar to RIKEN cDNA 2210010N04 gene [Rattus norvegicus]                     | gi 81295339         | 130 | 8  | 0  | 0 | 0 | 8  |
| 1664 | polymerase (RNA) III (DNA directed) polypeptide F, 39 kDa [Rattus norvegicus], gi 149041225 gb EDL95158.1  polymerase (RNA) III (DNA directed) polypeptide F (predicted), isoform CRA_a [Rattus norvegicus]                                                        | gi 157821329        | 42  | 9  | 0  | 0 | 0 | 9  |
| 1665 | anti-NGF30 antibody light-chain [Rattus norvegicus]                                                                                                                                                                                                                | gi 4096754          | 24  | 0  | 11 | 0 | 3 | 0  |
| 1666 | PREDICTED: similar to chloride ion pump-associated 55 kDa protein [Rattus norvegicus]                                                                                                                                                                              | gi 109507428        | 41  | 11 | 0  | 0 | 0 | 11 |
| 1667 | sodium-dependent high affinity glutamate transporter GLT-1A [Rattus norvegicus]                                                                                                                                                                                    | gi 10121878 (+9)    | 62  | 5  | 0  | 5 | 5 | 0  |
| 1668 | globin, alpha [Rattus norvegicus], gi 1778047 gb AAB40623.1  alpha globin, gi 149052190 gb EDM04007.1  rCG33691 [Rattus norvegicus]                                                                                                                                | gi 62078447         | 16  | 11 | 0  | 0 | 0 | 11 |
| 1669 | phosphoserine phosphatase [Rattus norvegicus], gi 62900749 sp Q5M819.1 SERB_RAT RecName: Full=Phosphoserine phosphatase; Short=PSase; Short=PSP; AltName: Full=O-phosphoserine phosphohydrolase, gi 56789499 gb AAH88310.1  Phosphoserine phosphatase [Rattus      | gi 57527332         | 25  | 2  | 9  | 0 | 3 | 0  |
| 1670 | transcription elongation factor B (SIII), polypeptide 2 [Mus musculus], gi 13592105 ref NP_112391.1  transcription elongation factor B (SIII), polypeptide 2 [Rattus norvegicus], gi 51317294 sp P62870.1 ELOB_RAT RecName: Full=Transcription elongation factor   | gi 13385800         | 13  | 9  | 0  | 0 | 0 | 9  |
| 1671 | electron-transfer-flavoprotein, alpha polypeptide [Rattus norvegicus], gi 122065179 sp P13803.4 ETFFA_RAT RecName: Full=Electron transfer flavoprotein subunit alpha, mitochondrial; Short=Alpha-ETF; Flags: Precursor, gi 56789726 gb AAH88412.1  Electron-tran   | gi 57527204         | 35  | 10 | 1  | 0 | 0 | 10 |
| 1672 | ion peptidase 1, mitochondrial [Rattus norvegicus], gi 81916424 sp Q92455.1 LONM_RAT RecName: Full=Lon protease homolog, mitochondrial; AltName: Full=Lon protease-like protein; Short=LONP; AltName: Full=Mitochondrial ATP-dependent protease Lon; AltName: F    | gi 19173766         | 106 | 10 | 0  | 0 | 0 | 10 |
| 1673 | rCG57161 [Rattus norvegicus]                                                                                                                                                                                                                                       | gi 149035271        | 300 | 5  | 3  | 1 | 2 | 3  |
| 1674 | RAN binding protein 6 [Rattus norvegicus], gi 149062682 gb EDM13105.1  rCG47920 [Rattus norvegicus]                                                                                                                                                                | gi 157821101        | 125 | 8  | 1  | 2 | 2 | 6  |
| 1675 | rCG62367, isoform CRA_b [Rattus norvegicus]                                                                                                                                                                                                                        | gi 149051499 (+1)   | 61  | 6  | 2  | 1 | 2 | 4  |
| 1676 | similar to hypothetical protein (predicted) [Rattus norvegicus]                                                                                                                                                                                                    | gi 149055579 (+1)   | 32  | 5  | 1  | 2 | 2 | 3  |
| 1677 | PREDICTED: similar to Myosin-6 (Myosin VI) [Rattus norvegicus]                                                                                                                                                                                                     | gi 109483723 (+1)   | 148 | 3  | 4  | 1 | 2 | 1  |
| 1678 | PREDICTED: similar to ribosomal protein S6 kinase polypeptide 3 [Rattus norvegicus], gi 109511791 ref XP_001054840.1  PREDICTED: similar to ribosomal protein S6 kinase polypeptide 3 [Rattus norvegicus]                                                          | gi 109510713 (+1)   | 97  | 5  | 1  | 2 | 2 | 3  |
| 1679 | FYN oncogene related to SRC, FGR, YES [Rattus norvegicus], gi 126310436 ref XP_001368891.1  PREDICTED: similar to FYN oncogene related to SRC, FGR, YES isoform 2 [Monodelphis domestica], gi 81863183 sp Q62844.1 FYN_RAT RecName: Full=Proto-oncogene tyrosin    | gi 6978863          | 61  | 6  | 0  | 0 | 0 | 6  |
| 1680 | coiled-coil domain containing 22 (predicted) [Rattus norvegicus]                                                                                                                                                                                                   | gi 149028461 (+1)   | 72  | 5  | 0  | 2 | 2 | 3  |
| 1681 | ribonuclease/angiogenin inhibitor 1, isoform CRA_b [Rattus norvegicus]                                                                                                                                                                                             | gi 149061561 (+1)   | 54  | 5  | 5  | 0 | 2 | 3  |
| 1682 | rCG55996 [Rattus norvegicus]                                                                                                                                                                                                                                       | gi 149036645        | 96  | 4  | 1  | 0 | 0 | 4  |
| 1683 | interleukin enhancer binding factor 2 [Mus musculus], gi 24234747 ref NP_004506.2  interleukin enhancer binding factor 2 [Homo sapiens], gi 207079937 ref NP_001128737.1  DKFP469C1132 protein [Pongo abelii], gi 57089135 ref XP_537263.1  PREDICTED: similar     | gi 13385872         | 43  | 7  | 0  | 4 | 4 | 3  |
| 1684 | PREDICTED: similar to glycogen synthase 1, muscle isoform 3 [Rattus norvegicus]                                                                                                                                                                                    | gi 109461930 (+3)   | 84  | 5  | 0  | 4 | 4 | 1  |
| 1685 | phosphodiesterase 12 [Rattus norvegicus], gi 37361834 gb AAQ91030.1  LRRGT00074 [Rattus norvegicus]                                                                                                                                                                | gi 148539973 (+1)   | 79  | 7  | 0  | 0 | 0 | 7  |
| 1686 | PREDICTED: similar to germinal histone H4 gene [Rattus norvegicus]                                                                                                                                                                                                 | gi 109504921 (+1)   | 11  | 2  | 7  | 0 | 2 | 0  |
| 1687 | rCG30986, isoform CRA_a [Rattus norvegicus]                                                                                                                                                                                                                        | gi 149024626        | 101 | 3  | 0  | 2 | 2 | 1  |
| 1688 | RAB9B, member RAS oncogene family [Rattus norvegicus], gi 149033183 gb EDL87990.1  rCG56886 [Rattus norvegicus]                                                                                                                                                    | gi 157824109        | 23  | 8  | 0  | 0 | 0 | 8  |
| 1689 | ASF1 anti-silencing function 1 homolog A [Rattus norvegicus], gi 149038636 gb EDL92925.1  ASF1 anti-silencing function 1 homolog A (S. cerevisiae) (predicted), isoform CRA_a [Rattus norvegicus]                                                                  | gi 213512016        | 23  | 6  | 0  | 0 | 0 | 6  |
| 1690 | regulator of G-protein signalling 3, isoform CRA_c [Rattus norvegicus]                                                                                                                                                                                             | gi 149059606 (+1)   | 106 | 6  | 4  | 0 | 1 | 5  |
| 1691 | ErbB3-binding protein 1 [Rattus norvegicus], gi 50925681 gb AAH79095.1  Proliferation-associated 2G4 [Rattus norvegicus], gi 149029665 gb EDL84836.1  proliferation-associated 2G4, isoform CRA_a [Rattus norvegicus]                                              | gi 51948384         | 44  | 11 | 0  | 0 | 0 | 11 |
| 1692 | rCG25584 [Rattus norvegicus]                                                                                                                                                                                                                                       | gi 149018515        | 122 | 6  | 0  | 3 | 3 | 3  |
| 1693 | hypothetical protein LOC682999 [Rattus norvegicus], gi 74196430 dbj BAE34358.1  unnamed protein product [Mus musculus], gi 149040933 gb EDL94890.1  rCG20102, isoform CRA_a [Rattus norvegicus], gi 171846582 gb AAI61899.1  LOC682999 protein [Rattus norvegicus] | gi 189027115        | 35  | 7  | 0  | 3 | 3 | 4  |
| 1694 | PREDICTED: similar to GCN1 general control of amino-acid synthesis 1-like 1 isoform 2 [Rattus norvegicus]                                                                                                                                                          | gi 109496005 (+1)   | 293 | 7  | 2  | 0 | 1 | 6  |
| 1695 | alpha-internexin [Rattus norvegicus]                                                                                                                                                                                                                               | gi 55622 (+1)       | 56  | 6  | 0  | 5 | 5 | 0  |
| 1696 | exportin, tRNA (nuclear export receptor for tRNAs) (predicted), isoform CRA_b [Rattus norvegicus]                                                                                                                                                                  | gi 149066813 (+1)   | 79  | 0  | 5  | 0 | 2 | 0  |
| 1697 | PREDICTED: similar to Transcription elongation factor SPT6 [Rattus norvegicus], gi 109491416 ref XP_001080796.1  PREDICTED: similar to Transcription elongation factor SPT6 [Rattus norvegicus]                                                                    | gi 62656585         | 199 | 3  | 5  | 0 | 2 | 1  |













|      |                                                                                                                                                                                                                                                                  |                   |     |   |   |   |   |   |
|------|------------------------------------------------------------------------------------------------------------------------------------------------------------------------------------------------------------------------------------------------------------------|-------------------|-----|---|---|---|---|---|
| 1994 | vitamin D binding protein prepeptide                                                                                                                                                                                                                             | gi 203927 (+3)    | 54  | 0 | 6 | 0 | 2 | 0 |
| 1995 | PREDICTED: similar to SET binding factor 2 [Rattus norvegicus]                                                                                                                                                                                                   | gi 109462683 (+1) | 221 | 3 | 0 | 1 | 1 | 2 |
| 1996 | 5'-3' exoribonuclease 2 (predicted), isoform CRA_a [Rattus norvegicus]                                                                                                                                                                                           | gi 149041185      | 109 | 1 | 4 | 0 | 1 | 0 |
| 1997 | nuclear receptor coactivator 1 (predicted), isoform CRA_b [Rattus norvegicus]                                                                                                                                                                                    | gi 149050860 (+1) | 152 | 1 | 3 | 0 | 1 | 0 |
| 1998 | PREDICTED: similar to Myotubularin-related protein 1 [Rattus norvegicus], gi 109506891[ref XP_001059230.1] PREDICTED: similar to Myotubularin-related protein 1 [Rattus norvegicus]                                                                              | gi 109506273      | 75  | 4 | 0 | 1 | 1 | 3 |
| 1999 | inositol polyphosphate-5-phosphatase F [Rattus norvegicus], gi 149067614[gb EDM17166.1] inositol polyphosphate-5-phosphatase F (predicted), isoform CRA_c [Rattus norvegicus]                                                                                    | gi 198442866      | 127 | 2 | 1 | 0 | 0 | 2 |
| 2000 | cct-5 protein [Rattus norvegicus]                                                                                                                                                                                                                                | gi 51012386       | 17  | 3 | 1 | 0 | 0 | 3 |
| 2001 | dynein cytoplasmic 2 heavy chain 1 [Rattus norvegicus], gi 81917503[sp Q9J79.1 DYHC2_RAT RecName: Full=Cytoplasmic dynein 2 heavy chain 1; AltName: Full=Cytoplasmic dynein 2 heavy chain; AltName: Full=Dynein cytoplasmic heavy chain 2; AltName: Full=Dynein] | gi 12711694       | 492 | 3 | 0 | 0 | 0 | 3 |
| 2002 | PREDICTED: similar to Nonsyndromic hearing impairment protein 5 homolog [Rattus norvegicus]                                                                                                                                                                      | gi 109472039 (+1) | 58  | 0 | 4 | 0 | 1 | 0 |
| 2003 | post-synaptic density protein 95 [Rattus norvegicus], gi 400891[sp P31016.1 DLG4_RAT RecName: Full=Disks large homolog 4; AltName: Full=Postsynaptic density protein 95; Short=PSD-95; AltName: Full=Synapse-associated protein 90; Short=SAP90, gi 2064551[gb A | gi 96655227       | 80  | 4 | 0 | 0 | 0 | 4 |
| 2004 | ribosomal protein S23 [Homo sapiens], gi 13195604[ref NP_077137.1] ribosomal protein S23 [Mus musculus], gi 17530965[ref NP_511172.1] ribosomal protein S23 [Rattus norvegicus], gi 77736325[ref NP_001029862.1] ribosomal protein S23 [Bos taurus], gi 1547592  | gi 4506701 (+1)   | 16  | 4 | 0 | 0 | 0 | 4 |
| 2005 | rab acceptor 1 (prenylated) [Rattus norvegicus], gi 56404679[sp O35394.1 PRAF1_RAT RecName: Full=Prenylated Rab acceptor protein 1; AltName: Full=PRA1 family protein 1, gi 2564205[gb AAB81721.1] prenylated rab acceptor 1 [Rattus norvegicus], gi 55562836[   | gi 13929090 (+1)  | 21  | 3 | 1 | 0 | 0 | 3 |
| 2006 | Rho guanine nucleotide exchange factor (GEF) 12 [Rattus norvegicus], gi 60549645[gb IAAX24128.1] leukemia-associated Rho guanine nucleotide exchange factor [Rattus norvegicus]                                                                                  | gi 61557421       | 173 | 1 | 3 | 0 | 1 | 0 |
| 2007 | PREDICTED: similar to Casitas B-lineage lymphoma [Rattus norvegicus], gi 109484591[ref XP_001066453.1] PREDICTED: similar to Casitas B-lineage lymphoma [Rattus norvegicus]                                                                                      | gi 109483387 (+1) | 112 | 3 | 0 | 0 | 0 | 3 |
| 2008 | PREDICTED: similar to Protein C9orf126 homolog [Rattus norvegicus]                                                                                                                                                                                               | gi 109468136 (+3) | 78  | 2 | 0 | 0 | 0 | 2 |
| 2009 | Smdnc1 protein [Rattus norvegicus]                                                                                                                                                                                                                               | gi 68533649 (+1)  | 14  | 4 | 0 | 0 | 0 | 4 |
| 2010 | PREDICTED: similar to jumonji, AT rich interactive domain 1C (Rbp2 like) [Rattus norvegicus]                                                                                                                                                                     | gi 109511645 (+2) | 175 | 0 | 5 | 0 | 2 | 0 |
| 2011 | aldehyde dehydrogenase 1A2 [Rattus norvegicus], gi 92087021[sp Q63639.2 AL1A2_RAT RecName: Full=Retinal dehydrogenase 2; Short=RALDH2; Short=RaLDH2; AltName: Full=Aldehyde dehydrogenase family 1 member A2; AltName: Full=Retinaldehyde-specific dehydrogena   | gi 225735575      | 57  | 0 | 5 | 0 | 2 | 0 |
| 2012 | RecName: Full=Brevican core protein; AltName: Full=Brain-enriched hyaluronan-binding protein; Short=Protein BEHAV; Contains: RecName: Full=Brevican core protein isoform 1; Contains: RecName: Full=Brevican core protein isoform 2; Flags: Precursor, gi 50939  | gi 2506815 (+1)   | 96  | 5 | 0 | 0 | 0 | 5 |
| 2013 | RecName: Full=Echinoderm microtubule-associated protein-like 1; Short=EMAP-1                                                                                                                                                                                     | gi 145558904 (+3) | 90  | 5 | 0 | 0 | 0 | 5 |
| 2014 | RGM domain family, member A (predicted), isoform CRA_b [Rattus norvegicus], gi 149057182[gb EDM08505.1] RGM domain family, member A (predicted), isoform CRA_b [Rattus norvegicus]                                                                               | gi 149057181 (+1) | 47  | 4 | 0 | 0 | 0 | 4 |
| 2015 | hypothetical protein LOC498100 [Rattus norvegicus], gi 149019987[gb EDL78135.1] rCG36622, isoform CRA_a [Rattus norvegicus]                                                                                                                                      | gi 197333822      | 56  | 4 | 0 | 0 | 0 | 4 |
| 2016 | HEAT repeat containing 6 [Rattus norvegicus], gi 189042487[sp AIJC95.1 HEAT6_RAT RecName: Full=HEAT repeat-containing protein 6, gi 119351091[gb ABL63441.1] 2700008B19Rik-like protein [Rattus norvegicus], gi 119351093[gb ABL63442.1] 2700008B19Rik-like pro  | gi 120586991 (+1) | 137 | 1 | 4 | 0 | 1 | 0 |
| 2017 | biogenesis of lysosome-related organelles complex-1, subunit 2 isoform 2 [Homo sapiens], gi 109090245[ref XP_001107659.1] PREDICTED: similar to biogenesis of lysosome-related organelles complex-1, subunit 2 isoform 3 [Macaca mulatta], gi 18088217[gb AAH20  | gi 47717129 (+1)  | 11  | 5 | 0 | 0 | 0 | 5 |
| 2018 | BH3 interacting domain death agonist [Rattus norvegicus], gi 88909592[sp Q9JL76.2 BID_RAT RecName: Full=BH3-interacting domain death agonist; AltName: Full=p22 BID; Short=BID; Contains: RecName: Full=BH3-interacting domain death agonist p15; AltName: Full  | gi 12083631       | 22  | 2 | 3 | 0 | 1 | 1 |
| 2019 | similar to hypothetical protein FLJ21103, isoform CRA_b [Rattus norvegicus]                                                                                                                                                                                      | gi 149027815 (+1) | 31  | 2 | 2 | 0 | 1 | 1 |
| 2020 | similar to hypothetical protein FLJ30656 (predicted), isoform CRA_a [Rattus norvegicus]                                                                                                                                                                          | gi 149054357 (+1) | 20  | 5 | 0 | 0 | 0 | 5 |
| 2021 | nucleoporin 205 [Rattus norvegicus], gi 149065249[gb EDM15325.1] nucleoporin 205kDa (predicted) [Rattus norvegicus]                                                                                                                                              | gi 157820537      | 227 | 5 | 0 | 0 | 0 | 5 |
| 2022 | transmembrane protein 111 [Mus musculus], gi 56605786[ref NP_001008356.1] transmembrane protein 111 [Rattus norvegicus], gi 71153384[sp Q99K13.3 TM111_MOUSE RecName: Full=Transmembrane protein 111, gi 71153386[sp Q5U2V8.3 TM111_RAT RecName: Full=Transmemb  | gi 28827824       | 30  | 4 | 0 | 0 | 0 | 4 |
| 2023 | serine (or cysteine) peptidase inhibitor, clade B (ovalbumin), member 6 [Rattus norvegicus], gi 38014574[gb AAH60594.1] Serine (or cysteine) peptidase inhibitor, clade B, member 6a [Rattus norvegicus], gi 149045246[gb EDL98332.1] serine (or cysteine) pep   | gi 40018548       | 43  | 1 | 3 | 0 | 1 | 0 |
| 2024 | glyoxylate reductase/hydroxypyruvate reductase [Rattus norvegicus], gi 149045798[gb EDL98798.1] rCG54768, isoform CRA_a [Rattus norvegicus], gi 165971635[gb AAI58681.1] Grhpr protein [Rattus norvegicus]                                                       | gi 166091519      | 36  | 0 | 5 | 0 | 2 | 0 |
| 2025 | similar to RIKEN cDNA 1810060J02 [Rattus norvegicus]                                                                                                                                                                                                             | gi 149048939 (+1) | 46  | 3 | 1 | 0 | 0 | 3 |
| 2026 | copper metabolism (Murr1) domain containing 1 [Rattus norvegicus], gi 149044792[gb EDL97978.1] rCG23272, isoform CRA_b [Rattus norvegicus], gi 165970730[gb AAI58753.1] Comm1 protein [Rattus norvegicus]                                                        | gi 169234820      | 21  | 4 | 1 | 0 | 0 | 4 |
| 2027 | rCG31475, isoform CRA_a [Rattus norvegicus]                                                                                                                                                                                                                      | gi 149023878 (+1) | 72  | 3 | 0 | 0 | 0 | 3 |
| 2028 | similar to hypothetical protein FLJ20546, isoform CRA_a [Rattus norvegicus]                                                                                                                                                                                      | gi 149052342 (+1) | 25  | 5 | 0 | 0 | 0 | 5 |
| 2029 | phosphoglucomutase 3 (predicted), isoform CRA_b [Rattus norvegicus], gi 187469167[gb AAI66838.1] Pgm3 protein [Rattus norvegicus]                                                                                                                                | gi 149018988 (+1) | 60  | 0 | 4 | 0 | 1 | 0 |
| 2030 | RecName: Full=Sodium/potassium-transporting ATPase subunit beta-2; AltName: Full=Sodium/potassium-dependent ATPase subunit beta-2, gi 203043[gb AAA40782.1] (Na+, K+)-ATPase-beta-2 subunit, gi 1314365[gb AAC52918.1] Na,K-ATPase beta-2 subunit                | gi 114400 (+2)    | 33  | 4 | 0 | 0 | 0 | 4 |
| 2031 | deoxyhypusine synthase [Rattus norvegicus], gi 54035741[sp Q6AY53.1 DHYS_RAT RecName: Full=Deoxyhypusine synthase; Short=DHS, gi 50927729[gb AAH79188.1] Deoxyhypusine synthase [Rattus norvegicus], gi 14903798[gb EDL92158.1] deoxyhypusine synthase, isofor   | gi 51948386       | 41  | 0 | 5 | 0 | 2 | 0 |
| 2032 | ATPase, H transporting, lysosomal V1 subunit G1 [Rattus norvegicus], gi 149059584[gb EDM10522.1] rCG55259, isoform CRA_c [Rattus norvegicus], gi 183985826[gb AAI66422.1] ATPase, H transporting, lysosomal V1 subunit G1 [Rattus norvegicus]                    | gi 157820847      | 14  | 4 | 0 | 0 | 0 | 4 |
| 2033 | dedicator of cyto-kinesis 3 [Rattus norvegicus], gi 149018624[gb EDL77265.1] dedicator of cyto-kinesis 3 (predicted) [Rattus norvegicus]                                                                                                                         | gi 157823849      | 153 | 5 | 0 | 0 | 0 | 5 |
| 2034 | RecName: Full=Cysteine and glycine-rich protein 2; Short=Cysteine-rich protein 2; Short=CRP2; AltName: Full=Smooth muscle cell LIM protein; Short=SmlIM, gi 1314351[gb AAC52554.1] smooth muscle cell LIM protein, gi 3184549[gb AAC18966.1] smooth muscle LIM   | gi 2497675 (+1)   | 21  | 5 | 0 | 0 | 0 | 5 |
| 2035 | PREDICTED: similar to 60S ribosomal protein L27a [Rattus norvegicus], gi 109461766[ref XP_001079874.1] PREDICTED: similar to 60S ribosomal protein L27a [Rattus norvegicus]                                                                                      | gi 62639430 (+3)  | 17  | 5 | 0 | 0 | 0 | 5 |
| 2036 | RER1 homolog [Mus musculus], gi 84781666[ref NP_001034101.1] RER1 retention in endoplasmic reticulum 1 homolog [Rattus norvegicus], gi 76363869[sp Q9CQU3.1]RER1_MOUSE RecName: Full=Protein RER1, gi 118573308[sp Q498C8.1]RER1_RAT RecName: Full=Protein RER1  | gi 13385882       | 23  | 5 | 0 | 0 | 0 | 5 |
| 2037 | DPPY splice variant c [Rattus norvegicus]                                                                                                                                                                                                                        | gi 112363659 (+2) | 91  | 4 | 0 | 0 | 0 | 4 |
| 2038 | immunoglobulin light chain [Rattus sp.]                                                                                                                                                                                                                          | gi 243868 (+1)    | 26  | 3 | 0 | 0 | 0 | 3 |
| 2039 | PREDICTED: similar to slit homolog 1 [Rattus norvegicus]                                                                                                                                                                                                         | gi 109484799 (+1) | 81  | 4 | 0 | 0 | 0 | 4 |
| 2040 | PREDICTED: similar to periodic tryptophan protein 1 homolog [Rattus norvegicus], gi 109481734[ref XP_001075998.1] PREDICTED: similar to periodic tryptophan protein 1 homolog [Rattus norvegicus]                                                                | gi 34862412       | 56  | 3 | 0 | 0 | 0 | 3 |
| 2041 | RecName: Full=Glutaminase kidney isoform, mitochondrial; Short=GLS; AltName: Full=L-glutamine amidohydrolase; AltName: Full=K-glutaminase; Contains: RecName: Full=Glutaminase kidney isoform 68 kDa chain; Contains: RecName: Full=Glutaminase kidney isoform   | gi 121447 (+3)    | 74  | 5 | 0 | 0 | 0 | 5 |
| 2042 | PREDICTED: similar to ribosomal protein L22 like 1 [Rattus norvegicus], gi 109470813[ref XP_001081142.1] PREDICTED: similar to ribosomal protein L22 like 1 [Rattus norvegicus]                                                                                  | gi 109468809 (+1) | 14  | 5 | 0 | 0 | 0 | 5 |
| 2043 | rCG38662, isoform CRA_a [Rattus norvegicus]                                                                                                                                                                                                                      | gi 149036085 (+2) | 26  | 4 | 0 | 0 | 0 | 4 |
| 2044 | isocitrate dehydrogenase 3 (NAD), gamma, isoform CRA_a [Rattus norvegicus]                                                                                                                                                                                       | gi 149029905 (+4) | 37  | 5 | 0 | 0 | 0 | 5 |
| 2045 | homolog of zebrafish ES1 [Rattus norvegicus]                                                                                                                                                                                                                     | gi 149043607 (+1) | 25  | 5 | 0 | 0 | 0 | 5 |
| 2046 | ATP synthase, H+ transporting, mitochondrial F1 complex, delta subunit, isoform CRA_b [Rattus norvegicus]                                                                                                                                                        | gi 149034587      | 18  | 3 | 0 | 0 | 0 | 3 |
| 2047 | acyl-Coenzyme A dehydrogenase family, member 9, isoform CRA_c [Rattus norvegicus]                                                                                                                                                                                | gi 149048722 (+2) | 69  | 5 | 0 | 0 | 0 | 5 |
| 2048 | signal recognition particle 19 [Rattus norvegicus], gi 149017170[gb EDL76221.1] signal recognition particle 19 (predicted), isoform CRA_a [Rattus norvegicus], gi 187469798[gb AAI67043.1] Signal recognition particle 19 [Rattus norvegicus]                    | gi 157817949      | 16  | 5 | 0 | 0 | 0 | 5 |
| 2049 | beta-glo [Rattus norvegicus], gi 34849742[gb AAH58502.1] Beta-glo [Rattus norvegicus]                                                                                                                                                                            | gi 40445397 (+1)  | 16  | 5 | 0 | 0 | 0 | 5 |
| 2050 | PREDICTED: similar to ubiquitin protein ligase E3 component n-recognin 2 isoform 3 [Rattus norvegicus]                                                                                                                                                           | gi 109486657 (+1) | 199 | 0 | 4 | 0 | 1 | 0 |
| 2051 | PREDICTED: similar to WD repeat and FYVE domain containing 3 [Rattus norvegicus]                                                                                                                                                                                 | gi 109499467      | 396 | 3 | 0 | 1 | 1 | 2 |
| 2052 | vacuolar protein sorting 33 homolog B [Rattus norvegicus], gi 23396894[sp Q63616.1 VP33B_RAT RecName: Full=Vacuolar protein sorting-associated protein 33B; Short=r-vps33b, gi 14774701[gb AAC52986.1] vacuolar protein sorting homolog r-vps33b, gi 51859108[gb | gi 25742586       | 71  | 3 | 0 | 1 | 1 | 2 |
| 2053 | ankyrin repeat and sterile alpha motif domain containing 1A [Rattus norvegicus], gi 149043458[gb EDL96909.1] ankyrin repeat and SAM domain containing 1 (predicted) [Rattus norvegicus]                                                                          | gi 157820667      | 122 | 1 | 2 | 0 | 1 | 0 |

|      |                                                                                                                                                                                                                                                                  |                   |     |   |   |   |   |   |
|------|------------------------------------------------------------------------------------------------------------------------------------------------------------------------------------------------------------------------------------------------------------------|-------------------|-----|---|---|---|---|---|
| 2054 | Surfeit 2 [Rattus norvegicus]                                                                                                                                                                                                                                    | gil37747910 (+1)  | 29  | 3 | 1 | 0 | 0 | 3 |
| 2055 | similar to RIKEN cDNA 1190002C06, isoform CRA_a [Rattus norvegicus]                                                                                                                                                                                              | gil149064303 (+1) | 46  | 3 | 0 | 0 | 0 | 3 |
| 2056 | PREDICTED: similar to KARP-1 binding protein 1 [Rattus norvegicus]                                                                                                                                                                                               | gil109478779 (+1) | 203 | 2 | 2 | 0 | 1 | 1 |
| 2057 | NADH dehydrogenase (ubiquinone) 1 alpha subcomplex, 8 [Rattus norvegicus]                                                                                                                                                                                        | gil149038913      | 20  | 4 | 0 | 0 | 0 | 4 |
| 2058 | PREDICTED: hypothetical protein [Rattus norvegicus], gil109492384[ref XP_001081787.1] PREDICTED: hypothetical protein [Rattus norvegicus]                                                                                                                        | gil109489500 (+1) | 95  | 3 | 0 | 0 | 0 | 3 |
| 2059 | similar to 5730405I09RIK protein (predicted), isoform CRA_a [Rattus norvegicus]                                                                                                                                                                                  | gil149028381 (+3) | 24  | 4 | 0 | 0 | 0 | 4 |
| 2060 | MON1 homolog b (yeast) (predicted), isoform CRA_a [Rattus norvegicus]                                                                                                                                                                                            | gil149038249 (+1) | 63  | 3 | 0 | 0 | 0 | 3 |
| 2061 | RecName: Full=Lysosome-associated membrane glycoprotein 2; Short=LAMP-2; AltName: Full=Lysosomal membrane glycoprotein type B; Short=LGP-B; AltName: Full=LGP-96; AltName: Full=LGP-110; AltName: Full=CD107 antigen-like family member B; AltName: CD_antigen=  | gil126382 (+5)    | 45  | 4 | 0 | 0 | 0 | 4 |
| 2062 | signal recognition particle 54 [Rattus norvegicus]                                                                                                                                                                                                               | gil149051248 (+1) | 30  | 3 | 0 | 0 | 0 | 3 |
| 2063 | BCL2-associated athanogene 5 [Rattus norvegicus], gil226509196[ref NP_001140774.1] hypothetical protein LOC100272849 [Zea mays], gil68051940[sp Q5QJC9.1]BAG5_RAT RecName: Full=BAG5 family molecular chaperone regulator 5; Short=BAG-5; AltName: Full=Bcl-2-as | gil56606102       | 51  | 3 | 0 | 0 | 0 | 3 |
| 2064 | PREDICTED: similar to CG13957-PA [Rattus norvegicus], gil109481736[ref XP_001076152.1] PREDICTED: similar to CG13957-PA [Rattus norvegicus]                                                                                                                      | gil62651891       | 136 | 4 | 0 | 0 | 0 | 4 |
| 2065 | PREDICTED: similar to Thiopurine S-methyltransferase (Thiopurine methyltransferase) [Rattus norvegicus], gil12585364[sp Q9Z0T0.1]TPMT_RAT RecName: Full=Thiopurine S-methyltransferase; AltName: Full=Thiopurine methyltransferase, gil4325177[gb AAID1293.1] t  | gil109505576 (+2) | 28  | 2 | 2 | 0 | 1 | 1 |
| 2066 | RecName: Full=PDZ and LIM domain protein 1; AltName: Full=Elfin; AltName: Full=LIM domain protein CLP-36; AltName: Full=C-terminal LIM domain protein 1, gil47940150[gb IAAH72465.1] PDZ and LIM domain 1 [Rattus norvegicus], gil149040142[gb EDL94180.1] PDZ a | gil78099788 (+1)  | 36  | 2 | 0 | 0 | 0 | 2 |
| 2067 | oxidation resistance 1, isoform CRA_a [Rattus norvegicus]                                                                                                                                                                                                        | gil149066454 (+1) | 87  | 0 | 3 | 0 | 1 | 0 |
| 2068 | NHL repeat containing 2 [Rattus norvegicus], gil149040462[gb EDL94500.1] NHL repeat containing 2 (predicted) [Rattus norvegicus]                                                                                                                                 | gil157818439      | 79  | 0 | 4 | 0 | 1 | 0 |
| 2069 | F-box protein 22 [Rattus norvegicus], gil78394960[gb AAI07671.1] F-box protein 22 [Rattus norvegicus], gil149041725[gb EDL95566.1] rCG58340, isoform CRA_b [Rattus norvegicus]                                                                                   | gil83642814       | 44  | 0 | 4 | 0 | 1 | 0 |
| 2070 | DnaJ (Hsp40) homolog, subfamily B, member 11 [Rattus norvegicus], gil81885840[sp Q6TUG0.1]DJB11_RAT RecName: Full=DnaJ homolog subfamily B member 11; AltName: Full=ER-associated dnaJ protein 3; AltName: Full=ERj3p; AltName: Full=ERdj3; AltName: Full=ER-as  | gil62543491       | 40  | 3 | 0 | 0 | 0 | 3 |
| 2071 | 5'-nucleotidase domain containing 3 [Rattus norvegicus], gil109481805[ref XP_001079805.1] PREDICTED: similar to CG1814-PA, isoform A [Rattus norvegicus]                                                                                                         | gil199562203      | 63  | 3 | 0 | 0 | 0 | 3 |
| 2072 | calcium channel, voltage-dependent, beta 1 subunit, isoform CRA_c [Mus musculus], gil149054083[gb EDM05900.1] calcium channel, voltage-dependent, beta 1 subunit, isoform CRA_c [Rattus norvegicus]                                                              | gil148684164 (+4) | 28  | 2 | 0 | 0 | 0 | 2 |
| 2073 | PREDICTED: similar to Dystroglycan precursor (Dystrophin-associated glycoprotein 1) [Rattus norvegicus]                                                                                                                                                          | gil34865933       | 97  | 3 | 0 | 0 | 0 | 3 |
| 2074 | RecName: Full=Iq gamma-2A chain C region                                                                                                                                                                                                                         | gil121052 (+11)   | 35  | 0 | 4 | 0 | 1 | 0 |
| 2075 | rCG38922 [Rattus norvegicus]                                                                                                                                                                                                                                     | gil149031320      | 186 | 0 | 4 | 0 | 1 | 0 |
| 2076 | glucosidase, alpha, acid, isoform CRA_a [Rattus norvegicus], gil149054965[gb EDM06782.1] glucosidase, alpha, acid, isoform CRA_a [Rattus norvegicus]                                                                                                             | gil149054964      | 106 | 3 | 0 | 0 | 0 | 3 |
| 2077 | histone H2B [Bos taurus], gil114605792[ref XP_001172848.1] PREDICTED: similar to histone H2B isoform 1 [Pan troglodytes], gil67968669[dbj BAE00693.1] unnamed protein product [Macaca fascicularis], gil149029303[gb EDL84570.1] rCG63091 [Rattus norvegicus]    | gil157785601      | 7   | 0 | 4 | 0 | 1 | 0 |
| 2078 | potassium channel tetramerisation domain containing 5 [Rattus norvegicus], gil149051987[gb EDM03804.1] potassium channel tetramerisation domain containing 5 (predicted) [Rattus norvegicus], gil197246769[gb AAI68712.1] Potassium channel tetramerisation dom  | gil157786778      | 26  | 4 | 0 | 0 | 0 | 4 |
| 2079 | PREDICTED: similar to hematopoietic stem/progenitor cells 176 [Rattus norvegicus], gil109513532[ref XP_001075285.1] PREDICTED: similar to hematopoietic stem/progenitor cells 176 [Rattus norvegicus]                                                            | gil109507775 (+2) | 18  | 4 | 0 | 0 | 0 | 4 |
| 2080 | NADH dehydrogenase (ubiquinone) 1 beta subcomplex, 6 [Rattus norvegicus], gil149045633[gb EDL98633.1] NADH dehydrogenase (ubiquinone) 1 beta subcomplex, 6 (predicted) [Rattus norvegicus]                                                                       | gil157820465      | 16  | 4 | 0 | 0 | 0 | 4 |
| 2081 | Chain A, 1.7 Angstrom Crystal Structure Of The Rat Vap-A Msp Homology Domain                                                                                                                                                                                     | gil73535844       | 14  | 4 | 0 | 0 | 0 | 4 |
| 2082 | RecName: Full=Sigma 1-type opioid receptor; Short=Sigma1-receptor; Short=Sigma1R, gil6434855[gb AAF08342.1]AF067769.1 sigma1 receptor [Rattus norvegicus], gil38541101[gb AAH61978.1] Opioid receptor, sigma 1 [Rattus norvegicus], gil149045689[gb EDL98689.1]  | gil81882051       | 25  | 3 | 0 | 0 | 0 | 3 |
| 2083 | mitochondrial trifunctional protein, alpha subunit [Rattus norvegicus], gil172045972[sp Q64428.2]ECHA_RAT RecName: Full=Trifunctional enzyme subunit alpha, mitochondrial; AltName: Full=TP-alpha; Includes: RecName: Full=Long-chain enoyl-CoA hydratase; Incl  | gil148747393 (+1) | 83  | 4 | 0 | 0 | 0 | 4 |
| 2084 | cystatin C, isoform CRA_a [Rattus norvegicus]                                                                                                                                                                                                                    | gil149041145 (+4) | 17  | 0 | 4 | 0 | 1 | 0 |
| 2085 | similar to adipocyte-specific protein 4 [Rattus norvegicus]                                                                                                                                                                                                      | gil149054551 (+1) | 56  | 3 | 0 | 0 | 0 | 3 |
| 2086 | RN protein [Rattus norvegicus], gil119371017[sp Q2TA68.1]OPA1_RAT RecName: Full=Dynamin-like 120 kDa protein, mitochondrial; AltName: Full=Optic atrophy protein 1 homolog; Contains: RecName: Full=Dynamin-like 120 kDa protein, form S1; Flags: Precursor, gi  | gil148747459 (+2) | 111 | 4 | 0 | 0 | 0 | 4 |
| 2087 | PREDICTED: similar to 60S ribosomal protein L32 [Rattus norvegicus], gil109476925[ref XP_001064496.1] PREDICTED: similar to 60S ribosomal protein L32 [Rattus norvegicus]                                                                                        | gil109475208 (+1) | 15  | 3 | 0 | 0 | 0 | 3 |
| 2088 | similar to chromosome 9 open reading frame 5 (predicted) [Rattus norvegicus]                                                                                                                                                                                     | gil149037154 (+1) | 88  | 4 | 0 | 0 | 0 | 4 |
| 2089 | similar to oxoglutarate dehydrogenase (lipoamide), isoform CRA_d [Rattus norvegicus]                                                                                                                                                                             | gil149047673 (+1) | 118 | 4 | 0 | 0 | 0 | 4 |
| 2090 | myosin light chain, regulatory B-like [Mus musculus], gil203097140[ref NP_001128489.1] similar to Myosin regulatory light chain 2-A, smooth muscle isoform (Myosin RLC-A) [Rattus norvegicus], gil127170[sp P13832.2]MRLCA_RAT RecName: Full=Myosin regulatory   | gil71037403       | 20  | 4 | 0 | 0 | 0 | 4 |
| 2091 | rCG33672, isoform CRA_c [Rattus norvegicus]                                                                                                                                                                                                                      | gil149052162 (+1) | 21  | 0 | 4 | 0 | 1 | 0 |
| 2092 | Enah/Vasp-like [Rattus norvegicus], gil25090259[sp O08719.1]EVL_RAT RecName: Full=Ena/VASP-like protein; AltName: Full=Ena/vasodilator-stimulated phosphoprotein-like, gil2058462[gb AAC53322.1] RNB6 [Rattus norvegicus]                                        | gil13162335 (+2)  | 42  | 2 | 1 | 0 | 0 | 2 |
| 2093 | adapter protein RUK-m1 [Rattus norvegicus], gil149042433[gb EDL96140.1] SH3-domain kinase binding protein 1, isoform CRA_f [Rattus norvegicus]                                                                                                                   | gil14009486 (+9)  | 44  | 3 | 0 | 0 | 0 | 3 |
| 2094 | serine/threonine kinase 32C [Rattus norvegicus], gil149061417[gb EDM11840.1] serine/threonine kinase 32C (predicted) [Rattus norvegicus]                                                                                                                         | gil157821485      | 55  | 2 | 1 | 0 | 0 | 2 |
| 2095 | protein-tyrosine-phosphatase (EC 3.1.3.48), receptor-linked form P1 precursor - rat                                                                                                                                                                              | gil1083771 (+5)   | 168 | 2 | 0 | 0 | 0 | 2 |
| 2096 | PREDICTED: similar to transformation related protein 53 binding protein 1 [Rattus norvegicus]                                                                                                                                                                    | gil109470711      | 177 | 0 | 2 | 0 | 1 | 0 |
| 2097 | coagulation factor XIII, A1 subunit [Rattus norvegicus], gil149045192[gb EDL98278.1] coagulation factor XIII, A1 subunit, isoform CRA_a [Rattus norvegicus], gil149045193[gb EDL98279.1] coagulation factor XIII, A1 subunit, isoform CRA_a [Rattus norvegicus]  | gil158186711 (+1) | 83  | 3 | 0 | 0 | 0 | 3 |
| 2098 | cyclic nucleotide phosphodiesterase 1, isoform CRA_b [Rattus norvegicus], gil149054232[gb EDM06049.1] cyclic nucleotide phosphodiesterase 1, isoform CRA_b [Rattus norvegicus]                                                                                   | gil149054231 (+2) | 45  | 3 | 0 | 0 | 0 | 3 |
| 2099 | PREDICTED: hypothetical protein [Rattus norvegicus], gil109508796[ref XP_001075785.1] PREDICTED: hypothetical protein [Rattus norvegicus]                                                                                                                        | gil109508061 (+2) | 144 | 2 | 0 | 0 | 0 | 2 |
| 2100 | sortilin 1, isoform CRA_a [Rattus norvegicus]                                                                                                                                                                                                                    | gil149025687 (+3) | 73  | 2 | 0 | 0 | 0 | 2 |
| 2101 | calcium/calmodulin-dependent protein kinase I [Rattus norvegicus], gil3122310[sp Q63450.2]KCC1A_RAT RecName: Full=Calcium/calmodulin-dependent protein kinase type 1; AltName: Full=CaM kinase I; Short=CaM-KI; AltName: Full=CaM kinase I alpha; Short=CaMKI-a  | gil19745200 (+1)  | 42  | 3 | 0 | 0 | 0 | 3 |
| 2102 | poly(A) polymerase alpha [Rattus norvegicus], gil149044213[gb EDL97595.1] poly (A) polymerase alpha (predicted), isoform CRA_a [Rattus norvegicus]                                                                                                               | gil157820829 (+1) | 82  | 0 | 3 | 0 | 1 | 0 |
| 2103 | small nuclear ribonucleoprotein D2 isoform 1 [Homo sapiens], gil58037145[ref NP_081219.1] small nuclear ribonucleoprotein D2 [Mus musculus], gil77735903[ref NP_001029648.1] small nuclear ribonucleoprotein D2 [Bos taurus], gil157820925[ref NP_001102869.1]   | gil47591538       | 14  | 3 | 0 | 0 | 0 | 3 |
| 2104 | transmembrane protein 85 [Mus musculus], gil157817408[ref NP_001099965.1] transmembrane protein 85 [Rattus norvegicus], gil81904578[sp Q9C2X9.1]TMM85_MOUSE RecName: Full=Transmembrane protein 85, gil12848544[dbj BAB27992.1] unnamed protein product [Mus mu  | gil13386014       | 20  | 3 | 0 | 0 | 0 | 3 |
| 2105 | fibulin 1 [Rattus norvegicus], gil149065711[gb EDM15584.1] fibulin 1 (predicted) [Rattus norvegicus]                                                                                                                                                             | gil189011620      | 78  | 0 | 3 | 0 | 1 | 0 |
| 2106 | neuron derived neurotrophic factor, isoform CRA_a [Rattus norvegicus]                                                                                                                                                                                            | gil149041043 (+1) | 16  | 3 | 0 | 0 | 0 | 3 |
| 2107 | mesoderm development candidate 2 [Rattus norvegicus], gil81883487[sp Q5U2R7.1]MESD2_RAT RecName: Full=Mesoderm development candidate 2, gil55250764[gb IAAH85892.1] Mesoderm development candidate 2 [Rattus norvegicus], gil149057436[gb EDM08759.1] mesoderm d | gil56605768       | 25  | 2 | 0 | 0 | 0 | 2 |
| 2108 | rCG42593, isoform CRA_b [Rattus norvegicus]                                                                                                                                                                                                                      | gil149034849      | 15  | 3 | 0 | 0 | 0 | 3 |
| 2109 | rCG22435 [Rattus norvegicus]                                                                                                                                                                                                                                     | gil149046424      | 17  | 3 | 0 | 0 | 0 | 3 |
| 2110 | hypothetical protein LOC287929 [Rattus norvegicus], gil149019693[gb EDL77841.1] similar to RIKEN cDNA 2610001E06 (predicted), isoform CRA_a [Rattus norvegicus], gil149019694[gb EDL77842.1] similar to RIKEN cDNA 2610001E06 (predicted), isoform CRA_a [Rattu  | gil157786734      | 16  | 3 | 0 | 0 | 0 | 3 |
| 2111 | retinoblastoma binding protein 5 [Rattus norvegicus], gil149058638[gb EDM09795.1] retinoblastoma binding protein 5 (predicted) [Rattus norvegicus]                                                                                                               | gil157820961      | 59  | 3 | 0 | 0 | 0 | 3 |
| 2112 | zinc finger, FYVE domain containing 1 [Rattus norvegicus], gil149025078[gb EDL81445.1] zinc finger, FYVE domain containing 1 (predicted), isoform CRA_a [Rattus norvegicus]                                                                                      | gil157822531      | 87  | 3 | 0 | 0 | 0 | 3 |
| 2113 | coiled-coil domain containing 124 [Rattus norvegicus], gil149036079[gb EDL90745.1] similar to hypothetical protein BC013949 (predicted), isoform CRA_a [Rattus norvegicus], gil149036080[gb EDL90746.1] similar to hypothetical protein BC013949 (predicted), i  | gil157823579      | 25  | 2 | 0 | 0 | 0 | 2 |
| 2114 | tropomyosin alpha isoform [Rattus norvegicus]                                                                                                                                                                                                                    | gil14134101 (+6)  | 29  | 0 | 3 | 0 | 1 | 0 |
| 2115 | RecName: Full=Cold shock domain-containing protein C2; AltName: Full=RNA-binding protein PIPPin, gil149065816[gb EDM15689.1] cold shock domain containing C2, RNA binding [Rattus norvegicus]                                                                    | gil32129826       | 17  | 0 | 2 | 0 | 1 | 0 |
